# Supplementary material for: Synthesis of sulfone-based nucleotide isosteres: identification of CMP-sialic acid synthetase inhibitors
Source: Royal Society of Chemistry journal article supplement (doi:10.1039/b819155g), 2008-11-18
Supplement: b819155g.pdf [file b819155g.pdf]

## Electronic Supplementary Information (ESI) for

# Synthesis of Sulfone-based Nucleotide Isosteres: Identification of CMP-Synthetase Inhibitors

Jessica H. Wong,<sup>‡</sup> Urvashi Sahni, Yanhong Li, Xi Chen, and Jacquelyn Gervay-Hague<sup>a</sup>

<sup>a</sup> Department of Chemistry, University of California, Davis, One Shields Avenue, Davis, CA, U.S.A.. Fax: 530 752- 8995; Tel: 530 754 9577; E-mail: gervay@chem.ucdavis.edu.

<sup>‡</sup> Recipient of the ACS Glaxo Smith-Kline Fellowship 2008.

### Table of Contents

| Contents                                     | Page Number |
|----------------------------------------------|-------------|
| General Experimental Techniques.....         | 4           |
| Experimental Procedure for compound 4.....   | 5           |
| Experimental Procedure for compound 5.....   | 6           |
| Experimental Procedure for compound 7.....   | 7-8         |
| Experimental Procedure for compound 8.....   | 8-9         |
| Experimental Procedure for compound 9.....   | 10          |
| Experimental Procedure for compound 10.....  | 11-12       |
| Experimental Procedure for compound 11.....  | 12-13       |
| Experimental Procedure for compound 12.....  | 13-14       |
| Experimental Procedure for compound 14 ..... | 14-15       |
| Experimental Procedure for compound 15.....  | 15-16       |
| Experimental Procedure for compound 16.....  | 16-17       |
| Experimental Procedure for compound 17.....  | 17-18       |
| Experimental Procedure for compound 18.....  | 18-19       |

|                                                      |              |
|------------------------------------------------------|--------------|
| Experimental Procedure for compound <b>19</b> .....  | <b>19-20</b> |
| Experimental Procedure for compound <b>20</b> .....  | <b>20-21</b> |
| Experimental Procedure for compound <b>21</b> .....  | <b>21</b>    |
| Experimental Procedure for compound <b>22</b> .....  | <b>22</b>    |
| NmCSS Substrate Assay.....                           | <b>22-23</b> |
| NmCSS Inhibition Assay.....                          | <b>23</b>    |
| <sup>1</sup> H Spectra for compound <b>4</b> .....   | <b>24</b>    |
| <sup>13</sup> C Spectra for compound <b>4</b> .....  | <b>25</b>    |
| HRMS Spectra for compound <b>4</b> .....             | <b>26</b>    |
| CE Spectra for compound <b>4</b> .....               | <b>27</b>    |
| <sup>1</sup> H Spectra for compound <b>5</b> .....   | <b>28</b>    |
| <sup>13</sup> C Spectra for compound <b>5</b> .....  | <b>29</b>    |
| HRMS Spectra for compound <b>5</b> .....             | <b>30</b>    |
| CE Spectra for compound <b>5</b> .....               | <b>31</b>    |
| <sup>1</sup> H Spectra for compound <b>7</b> .....   | <b>32</b>    |
| <sup>13</sup> C Spectra for compound <b>7</b> .....  | <b>33</b>    |
| HRMS Spectra for compound <b>7</b> .....             | <b>34</b>    |
| <sup>1</sup> H Spectra for compound <b>8</b> .....   | <b>35</b>    |
| <sup>13</sup> C Spectra for compound <b>8</b> .....  | <b>36</b>    |
| HRMS Spectra for compound <b>8</b> .....             | <b>37</b>    |
| <sup>1</sup> H Spectra for compound <b>9</b> .....   | <b>38</b>    |
| <sup>13</sup> C Spectra for compound <b>9</b> .....  | <b>39</b>    |
| HRMS Spectra for compound <b>9</b> .....             | <b>40</b>    |
| <sup>1</sup> H Spectra for compound <b>10</b> .....  | <b>41</b>    |
| <sup>13</sup> C Spectra for compound <b>10</b> ..... | <b>42</b>    |
| HRMS Spectra for compound <b>10</b> .....            | <b>43</b>    |
| CE Spectra for compound <b>10</b> .....              | <b>44</b>    |
| <sup>1</sup> H Spectra for compound <b>11</b> .....  | <b>45</b>    |
| <sup>13</sup> C Spectra for compound <b>11</b> ..... | <b>46</b>    |
| HRMS Spectra for compound <b>11</b> .....            | <b>47</b>    |
| <sup>1</sup> H Spectra for compound <b>12</b> .....  | <b>48</b>    |
| <sup>13</sup> C Spectra for compound <b>12</b> ..... | <b>49</b>    |
| HRMS Spectra for compound <b>12</b> .....            | <b>50</b>    |
| CE Spectra for compound <b>12</b> .....              | <b>51</b>    |
| <sup>1</sup> H Spectra for compound <b>14</b> .....  | <b>52</b>    |
| <sup>13</sup> C Spectra for compound <b>14</b> ..... | <b>53</b>    |
| HRMS Spectra for compound <b>14</b> .....            | <b>54</b>    |
| <sup>1</sup> H Spectra for compound <b>15</b> .....  | <b>55</b>    |
| <sup>13</sup> C Spectra for compound <b>15</b> ..... | <b>56</b>    |
| HRMS Spectra for compound <b>15</b> .....            | <b>57</b>    |
| <sup>1</sup> H Spectra for compound <b>16</b> .....  | <b>58</b>    |
| <sup>13</sup> C Spectra for compound <b>16</b> ..... | <b>59</b>    |
| HRMS Spectra Spectra for compound <b>16</b> .....    | <b>60</b>    |
| <sup>1</sup> H Spectra for compound <b>17</b> .....  | <b>61</b>    |
| <sup>13</sup> C Spectra for compound <b>17</b> ..... | <b>62</b>    |
| HRMS Spectra for compound <b>17</b> .....            | <b>63</b>    |

|                                                      |       |
|------------------------------------------------------|-------|
| <sup>1</sup> H Spectra for compound <b>18</b> .....  | 64    |
| <sup>13</sup> C Spectra for compound <b>18</b> ..... | 65    |
| HRMS Spectra for compound <b>18</b> .....            | 66    |
| <sup>1</sup> H Spectra for compound <b>19</b> .....  | 67    |
| <sup>13</sup> C Spectra for compound <b>19</b> ..... | 68    |
| HRMS Spectra for compound <b>19</b> .....            | 69    |
| HPLC Spectra for compound <b>19</b> .....            | 70    |
| <sup>1</sup> H Spectra for compound <b>20</b> .....  | 71    |
| <sup>13</sup> C Spectra for compound <b>20</b> ..... | 72    |
| HRMS Spectra for compound <b>20</b> .....            | 73    |
| HPLC Spectra Spectra for compound <b>20</b> .....    | 74    |
| <sup>1</sup> H Spectra for compound <b>21</b> .....  | 75    |
| <sup>13</sup> C Spectra for compound <b>21</b> ..... | 76    |
| HRMS Spectra for compound <b>21</b> .....            | 77    |
| HPLC Spectra for compound <b>21</b> .....            | 78    |
| <sup>1</sup> H Spectra for compound <b>22</b> .....  | 79    |
| <sup>13</sup> C Spectra for compound <b>22</b> ..... | 80    |
| HRMS Spectra for compound <b>22</b> .....            | 81    |
| HPLC Spectra for compound <b>22</b> .....            | 82    |
| CE spectrum for <b>CTP (1 mM)</b> .....              | 83    |
| CE spectrum for <b>UTP (1 mM)</b> .....              | 84    |
| CE spectrum for <b>CDP (1 mM)</b> .....              | 85    |
| CE spectrum for <b>UDP (1 mM)</b> .....              | 86    |
| CE spectrum for <b>CTP (5 mM)</b> .....              | 87    |
| CE spectrum for <b>UTP (5 mM)</b> .....              | 88    |
| CE spectrum for <b>CDP (5 mM)</b> .....              | 89    |
| CE spectrum for <b>UDP (5 mM)</b> .....              | 90    |
| CE spectrum for <b>CTP (10 mM)</b> .....             | 91    |
| CE spectrum for <b>UTP (10 mM)</b> .....             | 92    |
| CE spectrum for <b>CDP (10 mM)</b> .....             | 93    |
| CE spectrum for <b>controls</b> .....                | 94-95 |
| CE spectrum for compound <b>4</b> .....              | 96    |
| CE spectrum for compound <b>5</b> .....              | 97    |
| CE spectrum for compound <b>12</b> .....             | 98    |
| CE spectrum for compound <b>19</b> .....             | 99    |
| CE spectrum for compound <b>20</b> .....             | 100   |
| CE spectrum for compound <b>21</b> .....             | 101   |
| CE spectrum for compound <b>22</b> .....             | 102   |
| CE spectrum for <b>CDP</b> .....                     | 103   |
| Reference.....                                       | 104   |

## Materials and General Methods.

All chemicals were used as supplied without further purification. Solvents (MeOH 99.8%, CH<sub>2</sub>Cl<sub>2</sub> 99.8%, DMF 99.8%, THF 99.9%) were purchased in anhyd DriSolv™, used without further purification, and stored under argon. Glass-backed TLC plates (Silica Gel 60 with a 254 nm fluorescent indicator) were cut into 2 cm x 5 cm portions, used without further manipulation, and stored over desiccant. Developed TLC plates were visualized under a short-wave UV lamp, treated with a cerium-molybdate solution and charred. Column chromatography was conducted using flash silica gel (32-63 μm). NMR experiments (1D and 2D) were conducted on Varian NMRS 600 and Bruker Advance-III 600 MHz spectrometers at 295K. Optical rotation was recorded on 370 Polarimeter and Autopol IV Automatic Polarimeter at 589 nm wavelength. High resolution mass spectra were recorded in ESI-Orbitrap instrument. Final compounds were purified on reverse-phase HPLC (Vydac, C18, 10 mm X 250 mm). All reactions were carried out in dry glassware that was flamed dried and put under argon. All enzymatic reactions were analyzed using a P/ACE™ MDQ Capillary Electrophoresis System equipped with a UV detector of 200 and 254 nm wavelengths.

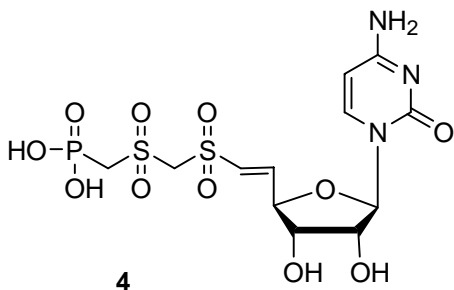

**(E)-2-((2R,3S,4S,5R)-5-(4-Amino-2-oxo-2H-pyrimidin-1-yl)-3,4-dihydroxy-tetrahydrofuran-2-yl]-vinylsulfonylmethylsulfonylmethyl)-phosphonic acid**

**(4).** To a stirred solution of compound **7** (21 mg, 0.03 mmol) in dry CH<sub>2</sub>Cl<sub>2</sub> (0.5 mL) was added TMSBr (71  $\mu$ L, 0.6 mmol) at 0 °C dropwise via a syringe. The mixture was warmed to room temperature and stirred for 36 h. The volatiles were then removed by rotary evaporation. The residue was dissolved in MeOH (1 mL), stirred for 40 min, and then concentrated in vacuo. The residue was co-evaporated with MeOH (1 mL) three more times. The mixture was then subjected to RP HPLC (water:methanol 95%:5%) to give compound **4** (10 mg) in 84% yield.  $[\alpha]_D^{24} = 3.6^\circ$  (c. 0.07, MeOH). <sup>1</sup>H NMR (600 MHz, CD<sub>3</sub>OD):  $\delta$  7.65 (d,  $J = 7.8$  Hz, 1H, H-6), 7.17 (dd,  $J = 15, 3.6$  Hz, 1H, H-5'), 7.00 (dd,  $J = 15, 1.8$  Hz, 1H, H-6'), 6.20 (d,  $J = 7.8$  Hz, 1H, H-5), 5.99 (d,  $J = 3$  Hz, 1H, H-1'), 4.68 (app m, 1H, H-4'), 4.25 (dd,  $J = 5.4, 1.2$  Hz, 1H, H-2'), 4.11 (dd,  $J = 6.6, 4.8$  Hz, 1H, H-3'), 4.05 (d,  $J = 15.0$  Hz, 2H, PCH<sub>2</sub>S), hydrogens between S and S (SCH<sub>2</sub>S) were not observed due to exchanged with deuterium. <sup>13</sup>C NMR (150 MHz, CD<sub>3</sub>OD):  $\delta$  167.7, 158.4, 147.6, 142.7, 130.1, 96.8, 92.8, 82.2, 75.3, 74.0, 67.0. Carbons between S and S were not observed due to exchanged with deuterium. HRMS (ESI+)  $m/z$  calcd for C<sub>12</sub>H<sub>18</sub>N<sub>3</sub>O<sub>11</sub>PS<sub>2</sub>Na (M + Na)<sup>+</sup> is 498.0018, found (M + Na)<sup>+</sup> 498.0029.

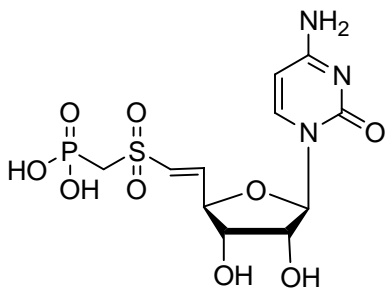

5

**(E)-2-((2R,3S,4S,5R)-5-(4-Amino-2-oxo-2H-pyrimidin-1-yl)-3,4-dihydroxy-tetrahydrofuran-2-yl)vinylsulfonyl)methylphosphonic acid (5).**

To a stirred solution of compound **8** (63 mg, 0.08 mmol) in dry CH<sub>2</sub>Cl<sub>2</sub> (0.5 mL) was added TMSBr (220  $\mu$ L, 1.7 mmol) at 0 °C dropwise via a syringe. The mixture was warmed to room temperature and stirred for 36 h. The volatiles were then removed by rotary evaporation. The residue was dissolved in MeOH, stirred for 40 min, and then concentrated in vacuo. The residue was coevaporated with MeOH (1 mL) three more times. The mixture was then subjected to RP HPLC (water:methanol 95%:5%) to give compound **5** (27 mg, 82%).  $[\alpha]_D^{31} = +19^\circ$  (c. 0.6, MeOH). <sup>1</sup>H NMR (600 MHz, CD<sub>3</sub>OD):  $\delta$  8.01 (d,  $J = 7.2$  Hz, 1H, H-6), 7.04 (app s, 2H, H-5' and H-6'), 6.26 (d,  $J = 7.8$  Hz, 1H, H-5), 5.92 (d,  $J = 3.6$  Hz, 1H, H-1'), 4.71 (d,  $J = 6.6$  Hz, 1H, H-4'), 4.30 (dd,  $J = 8.4$  Hz, 3.6 Hz, 1H, H-2'), 4.16 (dd,  $J = 11.4, 6.6$  Hz, 1H, H-3'), 3.62 (dd,  $J = 15.6, 6.6$  Hz, 2H, PCH<sub>2</sub>S). <sup>13</sup>C NMR (150 MHz, CD<sub>3</sub>OD):  $\delta$  161.1, 149.1, 146.3, 144.0, 131.2, 106.1, 96.0, 92.6, 82.8, 74.6, 73.8. HRMS (ESI+)  $m/z$  calcd for C<sub>11</sub>H<sub>17</sub>N<sub>3</sub>O<sub>9</sub>PS (M + H)<sup>+</sup> is 398.0423, found (M + H)<sup>+</sup> 398.0420.

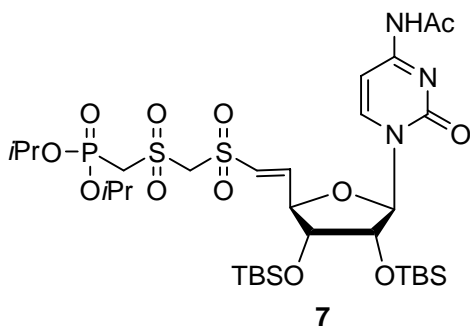

**Diisopropyl-(E)-2-((2R,3R,4S,5R)-5-(4-acetamido-2-oxo-2H-pyrimidin-1-yl)-3,4-bis-(tert-butyl-dimethyl-silyloxy)-tetrahydrofuran-2-yl)vinylsulfonylmethylsulfonylmethylphosphonate (7).** To a stirred solution of disulfone reagent **2**<sup>1</sup> (50 mg, 0.1 mmol) in dry THF (0.5 mL) was added LiBr (26 mg, 0.3 mmol) until dissolved, followed by diisopropylethylamine (50  $\mu$ L, 0.3 mmol) under argon at room temperature. The solution was stirred for 15 min and a solution of the crude 5'-cytidine aldehyde, **6**<sup>2</sup> (34 mg, 0.07 mmol), in THF (0.5 mL) was added dropwise via a syringe. The solution was stirred for 3 h at room temperature under argon and concentrated in vacuo. After flash-silica chromatography (75% EtOAc: 25% hexane), compound **7** (37 mg), an amorphous solid, was obtained in 67% yield.  $[\alpha]_D^{24} = +73.5^\circ$  (c. 0.26, EtOAc). <sup>1</sup>H NMR (600 MHz, CDCl<sub>3</sub>):  $\delta$  8.97 (s, 1H, NH), 7.59 (app m, 2H, H-6 and H-6'), 7.06 (dd,  $J = 15, 2.4$  Hz, 1H, H-5'), 5.81 (app s, 1H, H-1'), 5.56 (d,  $J = 15.6$  Hz, 1H, SCHS), 5.33 (d,  $J = 15$  Hz, 1H, SCHS), 4.90-4.84 (m, 2H, CH of isopropyls), 4.80 (d,  $J = 4.8$  Hz, 1H, H-4'), 4.23-4.18 (m, 2H, H-2' and PCHS), 3.87 (app t,  $J = 16.2$  Hz, 1H, PCHS), 3.80 (dd,  $J = 8.4, 4.2$  Hz, 1H, H-3'), 2.21 (s, 3H), 1.39 (d,  $J = 6$  Hz, 12 H, isopropyls), 0.89 (d,  $J = 4.2$  Hz, 18H, CH<sub>3</sub> of *tert*-butyl groups), 0.22 (s, 3H, CH<sub>3</sub> attached to silyls), 0.12 (s, 3H, CH<sub>3</sub> attached to silyls), 0.05 (s, 3H, CH<sub>3</sub> attached to silyls), 0.03 (s, 3H, CH<sub>3</sub> attached to silyls). <sup>13</sup>C NMR (150 MHz, CDCl<sub>3</sub>):  $\delta$  170.6, 162.6, 155.0,

144.7, 144.1, 130.1, 96.9, 93.4, 80.3, 75.0, 73.9, 73.6, 73.5, 70.0, 51.4, 25.94 (3), 25.91 (3), 25.0, 24.31, 24.29, 23.92, 23.89, 18.21, 18.16, -4.2 (2), -4.9 (2). HRMS (ESI+)  $m/z$  calcd for  $C_{32}H_{61}N_3O_{12}PS_2Si_2$  ( $M + H$ )<sup>+</sup> is 830.2973, found ( $M + H$ )<sup>+</sup> 830.2967.

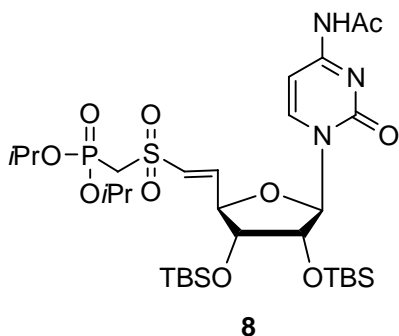

**Diisopropyl-(*E*)-2-((2*R*,3*R*,4*S*,5*R*)-5-(4-acetamido-2-oxo-2*H*-pyrimidin-1-yl)-3,4-bis-(*tert*-butyl-dimethyl-silyloxy)-tetrahydrofuran-2-yl)vinylsulfonyl methylphosphonate (**8**).** To a stirred solution of monosulfone reagent **3**<sup>3</sup> (495 mg, 1.2 mmol) in dry THF (1.7 mL) was added LiBr (305 mg, 3.5 mmol) until dissolved, followed by diisopropylethylamine (580  $\mu$ L, 3.5 mmol) under argon at room temperature. The solution was stirred for 15 min and a solution of the crude 5'-cytidine aldehyde, **6**<sup>2</sup> (405 mg, 0.8 mmol), in THF (1.7 mL) was added dropwise via a syringe. The solution was stirred 3 h and concentrated in vacuo. After flash-silica chromatography (75% EtOAc: 25% hexane), an amorphous solid product, **8** (416 mg, 70% yield) was obtained.  $[\alpha]_D^{24} = + 84.3^\circ$  (c. 0.34, EtOAc). <sup>1</sup>H NMR (600 MHz, CDCl<sub>3</sub>):  $\delta$  8.45 (s, 1H, NH), 7.98 (d,  $J = 7.8$  Hz, 1H, H-6), 7.45 (d,  $J = 7.2$  Hz, 1H, H-5), 7.13 (dd,  $J = 15, 1.8$  Hz, 1H, H-6'), 7.04 (dd,  $J = 15.6, 4.2$  Hz, 1H, H-5'), 5.80 (s, 1H, H-1'), 4.86-4.81 (m, 2H, CH of isopropyls),



4.27 (app. d,  $J = 2.4$  Hz, 1H, H-4'), 3.79 (dd,  $J = 8.4, 4.2$  Hz, 1H, H-2'), 3.64 (app t,  $J = 15.9$  Hz, 1H, PCHS), 3.55 (app t,  $J = 15.9$  Hz, 1H, PCHS), 3.49 (d,  $J = 4.8$  Hz, 1H, H-3'), 2.23 (s, 3H, CH<sub>3</sub> of acetate), 1.38 (app t,  $J = 6.6$  Hz, 12H, isopropyls), 0.91 (d,  $J = 15.6$  Hz, 18 H, *tert*-butyl groups) 0.24 (s, 3H, CH<sub>3</sub> from silyls), 0.13 (s, 3H, CH<sub>3</sub> from silyls), 0.06 (s, 3H, CH<sub>3</sub> from silyls), 0.05 (s, 3H, CH<sub>3</sub> from silyls). <sup>13</sup>C NMR (150 MHz, CDCl<sub>3</sub>):  $\delta$  170.3, 162.7, 155.1, 144.6, 143.7, 130.7, 96.8, 93.0, 80.4, 75.4, 74.4, 73.1, 73.0, 53.9, 26.0 (6), 25.2, 24.33, 24.29, 24.02, 23.97, 18.21, 18.18, -4.1, -4.2, -4.7, -4.9. HRMS (ESI+)  $m/z$  calcd for C<sub>31</sub>H<sub>59</sub>N<sub>3</sub>O<sub>10</sub>PSSi<sub>2</sub> (M + H)<sup>+</sup> is 752.3197, found (M + H)<sup>+</sup> 752.3190.

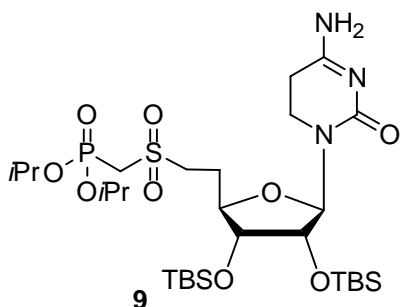

**Diisopropyl (2-((2R,3R,4S,5R)-5-(4-amino-2-oxo-5,6-dihydro-2H-pyrimidin-1-yl)-3,4-bis-(*tert*-butyl-dimethyl-silyloxy)-tetrahydrofuran-2-yl)ethylsulfonyl methylphosphonate (9).** To a solution of compound **8** (33 mg, 0.04 mmol) in

THF:MeOH (1:1, 0.8 mL) was added 10% Pd/C (15 mg). Hydrogen gas was introduced via a balloon to the reaction vessel. The reaction was stirred for 1 h at 1 atm under a hydrogen atmosphere. Afterward, the reaction mixture was filtered through celite and washed with EtOAc (3 X 2 mL). The contents were then concentrated in vacuo to give an oil product **9** (26 mg) in 84 % yield.  $[\alpha]_D^{23} = 3.0^\circ$  (c. 0.13, EtOAc). <sup>1</sup>H NMR (600 MHz, CDCl<sub>3</sub>):  $\delta$  7.56 (s, 1H, NH), 5.56 (d,

$J = 4.8$  Hz, 1H, H-1'), 4.84-4.78 (m, 2H, CH of isopropyls), 4.27 (app t,  $J = 4.8$  Hz, 1H, H-2'), 3.90 (dt,  $J = 10.8, 3.6$  Hz, 1H, H-4'), 3.82 (app t,  $J = 4.2$  Hz, 1H, H-3'), 3.65-3.46 (m, 4H, PCH<sub>2</sub>S and H-6'), 3.41-3.37 (m, 2H, H-6), 2.69-2.65 (m, 2H, H-5), 2.19-2.15 (m, 1H, H-5'), 2.01-1.96 (m, 1H, H-5'), 1.37 (app t,  $J = 4.8$  Hz, 12H, isopropyls), 0.9 (d,  $J = 11.4$  Hz, 18H, *tert*-butyls), 0.09 (s, 6H, methyls of silyls), 0.07 (s, 6H, methyls of silyls). <sup>13</sup>C NMR (150 MHz, CDCl<sub>3</sub>):  $\delta$  169.5, 152.4, 91.5, 81.0, 75.8, 73.14, 73.09, 73.05, 73.00, 72.91, 72.87, 72.7, 39.3, 31.3, 26.0, 25.8, 24.3, 24.24, 24.23, 23.93, 23.91, 23.90, 23.89, 18.18, 18.12, -4.2, -4.3, -4.5, -4.5. HRMS (ESI+)  $m/z$  calcd for C<sub>29</sub>H<sub>62</sub>N<sub>3</sub>O<sub>9</sub>PS<sub>2</sub>Si<sub>2</sub> (M + 2H)<sup>+</sup> is 715.3483, found (M + 2H)<sup>+</sup> 715.3242.

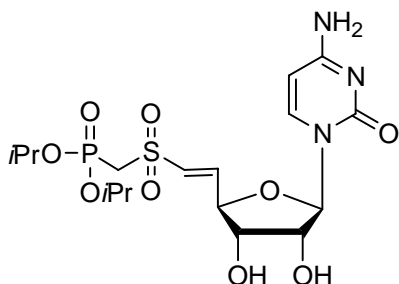

10

**Diisopropyl-(*E*)-2-((2*R*,3*S*,4*S*,5*R*)-5-(4-amino-2-oxo-2*H*-pyrimidin-1-yl)-3,4-dihydroxy-tetrahydrofuran-2-yl)vinylsulfonyl)methylphosphonate (10).** To a stirred solution of compound **8** (41 mg, 0.05 mmol) in dry THF (300  $\mu$ L) was added TBAF (1 M in THF, 125  $\mu$ L) and glacial acetic acid (10  $\mu$ L, 0.16 mmol). The solution was stirred for 1 h at room temperature. The solution was then concentrated in vacuo. After flash-silica chromatography (5% MeOH: 95% CH<sub>2</sub>Cl<sub>2</sub>), an amorphous solid (34 mg) was obtained. To a stirred solution of the

amorphous solid (34 mg, 0.06 mmol) in CH<sub>2</sub>Cl<sub>2</sub>, TFA (25 uL, 0.32 mmol) and triethylsilane (10 uL, 0.06 mmol) were added at 0 °C. The reaction was then warmed to room temperature and stirred for overnight. The reaction was then concentrated in vacuo and after flash-silica chromatography (5% MeOH: 95% CH<sub>2</sub>Cl<sub>2</sub> to 10% MeOH: 90% CH<sub>2</sub>Cl<sub>2</sub>), an amorphous solid, compound **10** (23 mg), was obtained in 72% yield.  $[\alpha]_D^{24} = +70.0^\circ$  (c. 0.18, MeOH). <sup>1</sup>H NMR (600 MHz, CD<sub>3</sub>OD): δ 7.64 (d, *J* = 7.8 Hz, 1H, H-6), 7.10 (dd, *J* = 15.6, 4.2 Hz, 1H, H-6'), 7.00 (dd, *J* = 15, 1.2 Hz, 1H, H-5'), 5.94 (d, *J* = 7.8 Hz, 1H, H-5), 5.88 (d, *J* = 3Hz, 1H, H-1'), 4.81-4.77 (m, 2H, CH of isopropyls), 4.63-4.61 (app m, 1H, H-4'), 4.22 (dd, *J* = 4.8, 3Hz, 1H, H-2'), 4.11 (dd, *J* = 6.6, 5.4 Hz, 1H, H-3'), 4.04 (d, *J* = 17.4 Hz, 2H, PCH<sub>2</sub>S), 1.36 (d, *J* = 7.8 Hz, 12H, isopropyls). NH<sub>2</sub> and 2 hydroxyls were exchanged with deuterium. <sup>13</sup>C NMR (150 MHz, CD<sub>3</sub>OD): δ 167.7, 158.1, 145.5, 143.2, 131.5, 106.2, 96.5, 94.0, 82.1, 75.1, 74.5, 74.33, 74.29, 24.4, 24.3, 24.09, 24.05. HRMS (ESI+) *m/z* calcd for C<sub>17</sub>H<sub>29</sub>N<sub>3</sub>O<sub>9</sub>PS (M + H)<sup>+</sup> is 482.1362, found (M + H)<sup>+</sup> 482.1347.

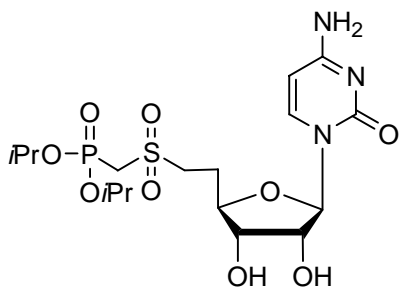

11

**Diisopropyl-(2-((2R,3S,4S,5R)-5-(4-amino-2-oxo-2H-pyrimidin-1-yl)-3,4-dihydroxy-tetrahydrofuran-2-yl)ethylsulfonyl)methylphosphonate (11).** To a stirred solution of compound **10** (18 mg, 0.04 mmol) in dry THF and MeOH (1:1,

1 mL) was added 10% Pd/C (10 mg). Hydrogen gas in a balloon was introduced to the reaction vessel. The solution was stirred for 2 h at room temperature at 1 atm under a hydrogen atmosphere. The solution was then filtered through celite and washed three times with MeOH (3 X 3 mL). Flash-silica chromatography (5% MeOH: 95% CH<sub>2</sub>Cl<sub>2</sub> to 10% MeOH: 90% CH<sub>2</sub>Cl<sub>2</sub>) to obtain an amorphous solid, **11** (12 mg), in 67 % yield.  $[\alpha]_D^{24} = +39.3^\circ$  (c. 0.21, MeOH). <sup>1</sup>H NMR (600 MHz, CD<sub>3</sub>OD):  $\delta$  7.61 (d,  $J = 7.2$  Hz, 1H, H-6), 5.90 (d,  $J = 7.8$  Hz, 1H, H-5), 5.74 (d,  $J = 3$  Hz, 1H, H-1'), 4.81-4.76 (m, 2H, CH of isopropyls), 4.16 (dd,  $J = 5.4, 3$  Hz, 1H, H-2'), 3.99-3.91 (app m, 1H, H-4'), 3.92 (dd,  $J = 6.6, 6$  Hz, 1H, H-3'), 3.58-3.53 (m, 1H, H-6'), 3.47-3.42 (m, 1H, H-6'), 2.32-2.27 (m, 1H, H-5'), 2.18-2.13 (m, 1H, H-5'), 1.34 (d,  $J = 6.6$  Hz, 12H, isopropyls). NH<sub>2</sub>, PCH<sub>2</sub>S and 2 hydroxyls were exchanged with deuterium. <sup>13</sup>C NMR (150 MHz, CD<sub>3</sub>OD):  $\delta$  167.7, 158.3, 143.2, 96.3, 93.8, 82.4, 75.5, 74.6, 74.4, 74.36, 74.33, 52.6, 26.4, 24.37, 24.36, 24.06, 24.02. HRMS (ESI+)  $m/z$  calcd for C<sub>17</sub>H<sub>31</sub>N<sub>3</sub>O<sub>9</sub>PS (M + H)<sup>+</sup> is 484.1519, found (M + H)<sup>+</sup> 484.1506.

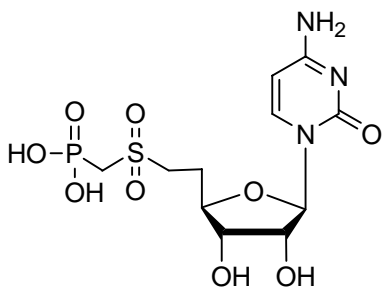

**12**

**(2-((2R,3S,4S,5R)-5-(4-amino-2-oxo-2H-pyrimidin-1-yl)-3,4-dihydroxy-tetrahydrofuran-2-yl)ethylsulfonylethylmethylphosphonic acid (12).** Compound **11** (10 mg, 0.02 mmol) was dissolved in CH<sub>2</sub>Cl<sub>2</sub> (0.2 mL) and TMSBr (390  $\mu$ L, 2.6

mmol) was added at 0 °C via a syringe. The reaction was warmed to room temperature and stirred for 36 h after which the reaction was concentrated in vacuo. MeOH (1 mL) was added, stirring was continued for 40 min, and then the reaction was concentrated in vacuo. The residue was co-evaporated with MeOH (3 X 1 mL) three more times. The mixture was then subjected to RP HPLC (water:methanol) to give compound **12** (7 mg, 84%).  $[\alpha]_D^{31} = +2.3^\circ$  (c. 0.3, MeOH).  $^1\text{H}$  (600 MHz,  $\text{CD}_3\text{OD}$ ):  $\delta$  7.71 (d,  $J = 7.8$  Hz, 1H, H-6), 6.06 (d,  $J = 7.8$  Hz, 1H, H-5'), 5.64 (d,  $J = 4.2$  Hz, 1H, H-1'), 4.39 (dd,  $J = 5.4, 4.2$  Hz, 1H, H-2'), 4.17-4.14 (m, 1H, H-4'), 4.07 (app t,  $J = 6$  Hz, 1H, H-3'), 3.69 (d,  $J = 15.5$  Hz, 2H,  $\text{PCH}_2\text{S}$ ), 3.56-3.50 (m, 2 H, H-6'), 2.35-2.30 (m, 1H, H-5'), 2.24-2.19 (m, 1H, H-5').  $\text{NH}_2$  and 2 hydroxyls were exchanged with deuterium.  $^{13}\text{C}$  NMR (150 MHz,  $\text{D}_2\text{O}$ ):  $\delta$  159.5, 148.6, 144.6, 95.2, 91.5, 81.8, 73.6, 72.7, 51.4 (d,  $J = 120.8$  Hz), 50.5, 25.1. HRMS (ESI+)  $m/z$  calcd for  $\text{C}_{11}\text{H}_{19}\text{N}_3\text{O}_9\text{PS}$  ( $\text{M} + \text{H}$ ) $^+$  is 400.0580, found ( $\text{M} + \text{H}$ ) $^+$  400.0602.

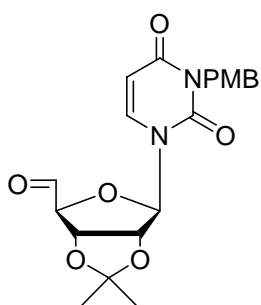

**14**

**(3*aR*,4*S*,6*R*,6*aS*)-6-(3-(4-methoxybenzyl)-3,4-dihydro-2,4-dioxopyrimidin-1(2H)-yl)-tetrahydro-2,2-dimethylfuro[3,4-*d*][1,3]dioxole-4-carbaldehyde (14).**

To a stirred solution of Dess-Martin periodinane (1.76 g, 4.17 mmol) in dry

dichloromethane (7 mL), a solution of compound **13**<sup>4</sup> (844 mg, 2.08 mmol) in dry dichloromethane (5 mL) was added dropwise over 5 min. at room temperature under argon. TLC monitoring showed no more starting material after 3 h. The solvent was removed under vacuum. The residue was taken up in ethyl acetate (50 mL), washed with 5% Na<sub>2</sub>SO<sub>3</sub> solution (30 mL), saturated aqueous NaHCO<sub>3</sub> followed by water (30 mL), and brine (15 mL) and dried over Na<sub>2</sub>SO<sub>4</sub> to obtain crude yellow oil. The product was placed on a flash silica gel column and eluted, respectively, with 1:1, 3:2, and 4:1 ethyl acetate-hexanes, to afford 80% of the aldehyde **14**.  $[\alpha]_D^{24} = -14.3^\circ$  (c. 0.07, CH<sub>2</sub>Cl<sub>2</sub>). <sup>1</sup>H NMR (600 MHz, CDCl<sub>3</sub>):  $\delta$  9.24 (s, 1H, H-5' aldehyde peak), 7.37 (d,  $J = 8.6$  Hz, 2H, phenyl), 7.16 (d,  $J = 8.0$  Hz, 1H, H-6), 6.83 (d,  $J = 8.6$  Hz, 2H, phenyl), 5.78 (d,  $J = 8.0$  Hz, 1H, H-5), 5.44 (s, 1H, H-1'), 5.26 (d,  $J = 6.0$  Hz, 1H, H-4'), 5.08 (d,  $J = 12.0$  Hz, 1H, H-3'), 5.03 (d,  $J = 12.0$  Hz, 1H, NCH), 4.88 (d,  $J = 12.0$  Hz, 1H, NCH), 4.53 (s, 1H, H-2'), 3.78 (s, 3H, OCH<sub>3</sub>), 1.53 (s, 3H, isopropylidene), 1.37 (s, 3H, isopropylidene). <sup>13</sup>C NMR (150 MHz, CDCl<sub>3</sub>):  $\delta$  199.6, 162.4, 159.5, 151.3, 141.8, 136.3, 131.6, 131.2, 129.5, 128.5, 113.9, 102.8, 101.3, 94.4, 85.2, 84.4, 55.5, 43.7, 26.6, 25.0. HRMS (MALDI)  $m/z$  calcd for C<sub>20</sub>H<sub>22</sub>N<sub>2</sub>O<sub>7</sub> [M + H]<sup>+</sup> is 403.1505, found [M + H]<sup>+</sup> 403.1449.

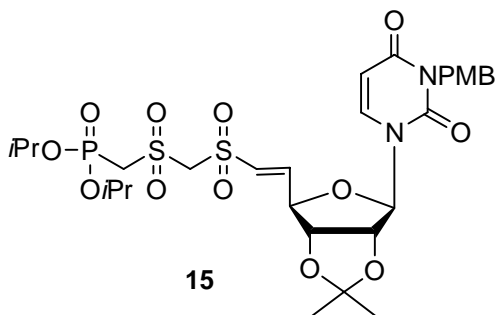

**Diisopropyl-(E)-2-(3*aR*,4*R*,6*R*,6*aS*)-6-(3-(4-methoxybenzyl)-2,4-dioxo-3,4-dihydro-2H-pyrimidin-1-yl)-2,2-dimethyl-tetrahydro-furo[3,4-*d*][1,3]dioxol-4-yl)vinylsulfonyl)methylsulfonyl)methylphosphonate (15).** To a stirred solution of disulfone reagent **2**<sup>1</sup> (357 mg, 0.71 mmol), *N,N*-diisopropylethylamine (148.5  $\mu$ L, 0.85 mmol), and lithium bromide (0.85 mmol) in dry THF (15 mL) was added dropwise under argon compound **14** (114.6 mg, 0.28 mmol) in dry THF and stirred for 2.5 h at r. t. The reaction mixture was acidified with diluted (1:1) acetic acid, extracted with ethyl acetate, washed with water, dried over sodium sulfate, and chromatographed on silica-gel (hexane-ethyl acetate 2:8) to afford 64% of the main product **15**.  $[\alpha]_D^{24} = +24.5^\circ$  (c. 0.51, CH<sub>2</sub>Cl<sub>2</sub>). <sup>1</sup>H NMR (600 MHz, CDCl<sub>3</sub>):  $\delta$  7.40 (d,  $J = 9.0$  Hz, 2H, phenyl), 7.13 (dd,  $J = 15.6, 4.2$  Hz, 1H, H-6'), 7.10 (d,  $J = 7.8$  Hz, 1H, H-6), 6.84 (d,  $J = 9.0$  Hz, 2 H, phenyl), 6.79 (dd,  $J = 15.6, 1.8$  Hz, 1H, H-5'), 5.78 (d,  $J = 7.8$  Hz, 1H, H-5), 5.55 (s, 1H, H-1'), 5.11-4.77 (m, 9H, NCH<sub>2</sub>, SCH<sub>2</sub>S, H-2', H-3', H-4', CH of isopropyls), 4.04-3.85 (m, 2H, PCH<sub>2</sub>S), 3.77 (s, 3H, OCH<sub>3</sub>), 1.55 (s, 3H, isopropylidene), 1.34-1.37 (m, 15H, isopropyls and isopropylidenes). <sup>13</sup>C NMR (150 MHz, CDCl<sub>3</sub>):  $\delta$  162.5, 159.4, 150.9, 147.7, 141.0, 130.9, 128.8, 128.7, 114.9, 114.1, 103.0, 97.6, 86.9, 84.8, 84.3, 77.6, 73.62, 73.58, 73.53, 70.5, 55.5, 51.9, 43.9, 27.3, 25.5, 24.39, 24.37,

23.97, 23.92. HRMS (MALDI)  $m/z$  calcd for  $C_{29}H_{41}N_2O_{13}PS_2$   $[M + Na]^+$  is 743.1685, found  $[M + Na]^+$  743.1905.

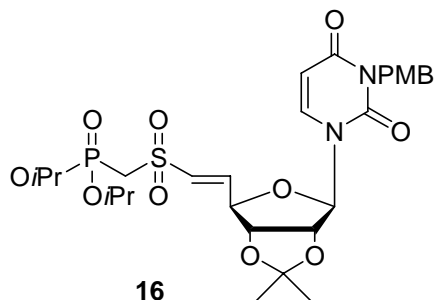

**Diisopropyl ((E)-2-((3*a*S,4*R*,6*R*,6*a*S)-6-(3-(4-methoxybenzyl)-2,4-dioxo-3,4-dihydro-2H-pyrimidin-1-yl)-2,2-dimethyl-tetrahydro-furo[3,4-*d*][1,3]dioxol-4-yl)-vinylsulfonyl)methylphosphonate (16).** To a stirred solution of

monosulfone reagent **3**<sup>3</sup> (280.4 mg, 0.56 mmol), *N,N*-diisopropylethylamine (98  $\mu$ L, 0.57 mmol), and lithium bromide (0.57 mmol) in dry THF (5 mL) was added dropwise under argon compound **14** (73 mg, 0.19 mmol) in dry THF and stirred for 6 h at r. t. The reaction mixture was acidified with diluted 2 mL (1:1) acetic acid and water, extracted with ethyl acetate, washed with water, dried over sodium sulfate, and chromatographed on silica-gel (hexane-ethyl acetate 2:8) to afford 67% of the main product **16**.  $[\alpha]_D^{24} = +21.7^\circ$  (c. 0.06,  $CH_2Cl_2$ ).  $^1H$  NMR (600 MHz,  $CDCl_3$ ):  $\delta$  7.43 (d,  $J = 9.0$  Hz, 2H, phenyl), 7.16 (d,  $J = 8.4$  Hz, 1H, H-6), 7.06 (dd,  $J = 15.6, 5.4$  Hz, 1H, H-6'), 6.88 (dd,  $J = 15.6, 1.8$  Hz, 1H, H-5'), 6.84 (d,  $J = 9.0$  Hz, 2H, phenyl), 5.77 (d,  $J = 7.8$  Hz, 1H, H-5), 5.65 (d,  $J = 1.8$  Hz, 1H, H-1'), 5.05-4.73 (m, 7H,  $NCH_2$ , H-2', H-3', CH of isopropyls, H-4'), 3.76 (s, 3H,  $OCH_3$ ), 3.52 (dd,  $J = 16.2, 4.2$  Hz, 2H,  $PCH_2S$ ), 1.55 (s, 3H, isopropylidene), 1.32-1.36 (m, 15H, isopropyls and isopropylidenes).  $^{13}C$  NMR (150 MHz,  $CDCl_3$ ):



$\delta$  162.5, 159.4, 150.8, 144.5, 140.7, 131.1, 130.6, 128.8, 115.1, 114.1, 102.9, 96.4, 86.3, 84.8, 84.2, 73.16, 73.14, 73.09, 55.5, 54.2, 53.3, 43.9, 27.3, 25.6, 24.33, 24.30, 23.99, 23.98. HRMS (MALDI)  $m/z$  calcd for  $C_{28}H_{39}N_2O_{11}PS$   $[M + Na]^+$  is 665.1910, found  $[M + Na]^+$  665.2191.

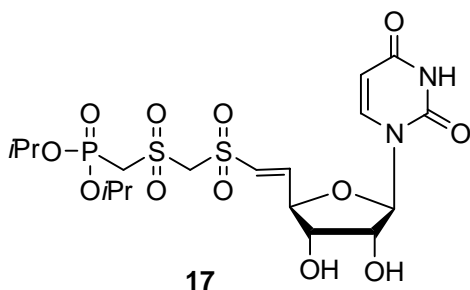

**Disopropyl-((E)-2-((2R,3S,4S,5R)-5-(2,4-dioxo-3,4-dihydro-2H-pyrimidin-1-yl)-3,4-dihydroxy-tetrahydro-furan-2-yl)vinylsulfonyl)methylsulfonyl)methyl**

**phosphonate (17).** To a solution of **15** (474 mg, 0.64 mmol) in 46.9 mL of acetonitrile was added ceric ammonium nitrate (1.74 g, 3.17 mmol) in 4.69 mL of water, and the mixture was heated to reflux for 30 min., evaporated the solvent and then diluted with water, and extracted with ethyl acetate (3 X 5 mL). Flash chromatography over silica gel (ethyl acetate:MeOH:water = 6:0.5:0.5) afforded **17** in 65% yield. The residue was purified on reverse phase HPLC using methanol and water.  $[\alpha]_D^{24} = + 47.1^\circ$  (c. 0.03, MeOH).  $^1H$  NMR (600 MHz,  $CD_3OD$ ):  $\delta$  7.59 (d,  $J = 8.4$  Hz, 1H, 6-H), 7.17 (dd,  $J = 15.6, 5.4$  Hz, 1H, H-6'), 6.95 (dd,  $J = 15.6, 1.8$  Hz, 1H, H-5'), 5.90 (d,  $J = 1.7$  Hz, 1H, H-1'), 5.73 (d,  $J = 8.4$  Hz, 1H, H-5), 4.80 (m, 2H, CH of isopropyl), 4.65 (m, 1H, H-2'), 4.23 (m, 1H, H-4'), 4.15 (m, 1H, H-3'), 1.36 (d,  $J = 5.4$  Hz, 12H, isopropyls). Hydrogens between P and S ( $PCH_2S$ ) and S and S ( $SCH_2S$ ) were exchanged with deuterium

and not observed.  $^{13}\text{C}$  NMR (150 MHz,  $\text{CD}_3\text{OD}$ ):  $\delta$  164.8, 151.0, 147.1, 141.6, 128.4, 102.2, 91.2, 81.5, 73.66, 73.64, 73.18, 73.07, 70.5, 50.2 (d), 23.18, 23.15, 22.84, 22.81. HRMS (MALDI)  $m/z$  calcd for  $\text{C}_{18}\text{H}_{29}\text{N}_2\text{O}_{12}\text{PS}_2$   $[\text{M} + \text{H}]^+$  is 561.0978, found  $[\text{M} + \text{H}]^+$  561.0966.

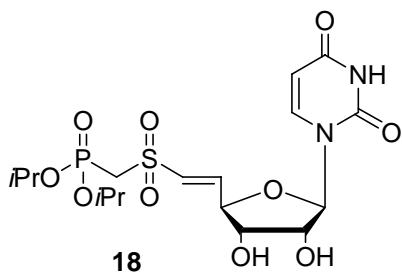

**Diisopropyl ((E)-2-((2R,3R,4S,5R)-5-(2,4-dioxo-3,4-dihydro-2H-pyrimidin-1-yl)-3,4-dihydroxy-tetrahydrofuran-2-yl)-vinylsulfonyl)methylphosphonate**

**(18)**. To a solution of **16** (145 mg, 0.23 mmol) in 13 mL of acetonitrile was added ceric ammonium nitrate (652 mg, 1.19 mmol) in 1.3 mL of water, and the mixture was heated to reflux for 30 min. The solvent was then evaporated; the residue was diluted with water, and extracted with ethyl acetate (3X5 mL). Flash chromatography over silica gel (ethyl acetate:MeOH:water = 6:0.5:0.5) afforded **18** in 72% yield. The residue was purified on reverse phase HPLC using methanol and water.  $[\alpha]_{\text{D}}^{24} = +20.0^\circ$  (c. 0.03, MeOH).  $^1\text{H}$  NMR (600 MHz,  $\text{CD}_3\text{OD}$ ):  $\delta$  7.64 (d,  $J = 8.4$  Hz, 1H, H-6), 7.05 (dd,  $J = 15.6, 5.4$  Hz, 1H, H-6'), 6.95 (dd,  $J = 15.6, 1.8$  Hz, 1H, H-5'), 5.86 (d,  $J = 1.7$  Hz, 1H, H-1'), 5.73 (d,  $J = 8.4$  Hz, 1H, H-5), 4.79 (m, 2H, CH of isopropyl), 4.58 (m, 1H, H-4'), 4.28 (m, 1H, H-2'), 4.14 (m, 1H, H-3'), 4.01 (d,  $J = 16.8$  Hz, 2H,  $\text{SCH}_2\text{P}$ ), 1.34-1.36 (d,  $J = 6.0$  Hz, 12H, isopropyls).  $^{13}\text{C}$  NMR (150 MHz,  $\text{CD}_3\text{OD}$ ):  $\delta$  164.8, 150.9, 144.1, 142.0,

130.3, 102.0, 91.7, 81.3, 73.24, 73.15, 73.12, 73.07, 23.17, 23.15, 22.89, 22.88.

A carbon between P and S is not observed due to exchanged with deuterium.

HRMS (MALDI)  $m/z$  calcd for  $C_{17}H_{27}N_2O_{10}PS$   $[M + H]^+$  is 483.1202, found  $[M + H]^+$ : 483.1213.

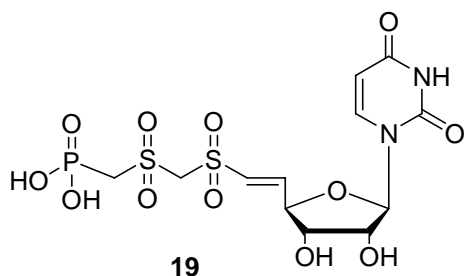

**(E)-2-((2R,3S,4S,5R)-5-(2,4-dioxo-3,4-dihydro-2H-pyrimidin-1-yl)-3,4-dihydroxy-tetrahydrofuran-2-yl)vinylsulfonylmethyl phosphonic acid (19).** To a stirred solution of **17** (33 mg) in dichloromethane was added TMSBr (0.11 mL) drop wise at 0 °C under argon. The reaction mixture was stirred overnight at room temperature, and then it was evaporated. Working up with methanol gave compound **19** in quantitative yields. The residue was purified on reverse phase HPLC using methanol and water to give 76% of the desired product **19**.  $[\alpha]_D^{24} = +47.0^\circ$  (c. 0.03, MeOH).  $^1H$  NMR (600 MHz,  $CD_3OD$ ):  $\delta$  7.60 (d,  $J = 8.4$  Hz, 1H, H-6), 7.16 (dd,  $J = 15.6, 5.4$  Hz, 1H, H-6'), 6.95 (dd,  $J = 15.6, 1.8$  Hz, 1H, H-5'), 5.94 (d,  $J = 1.7$  Hz, 1H, H-1'), 5.75 (d,  $J = 8.4$  Hz, 1H, H-5), 5.37 (s, 2H,  $SCH_2S$ ), 4.65 (m, 1H, H-4'), 4.23 (t, 1H, H-2'), 4.15 (t, 1H, H-3'), 4.09 (d,  $J = 16.2$  Hz, 2H,  $PCH_2S$ ).  $^{13}C$  NMR (150 MHz,  $CH_3OD$ ):  $\delta$  164.9, 151.0, 146.9, 141.6, 128.7, 102.2, 91.2, 81.5, 73.2, 73.0. Carbons between P and S and also carbons between S and S are not observed due to exchanged with

deuterium. Low intensity doublet is seen around 50.3 for carbons between P and S. HRMS  $m/z$  calcd for  $C_{12}H_{17}N_2O_{12}PS_2$   $[M + H]^+$  is 477.0039, found  $[M + H]^+$  477.0031.

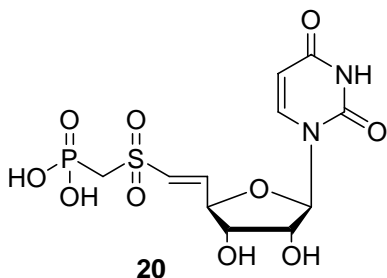

**(E)-2-((2R,3R,4S,5R)-5-(2,4-dioxo-3,4-dihydro-2H-pyrimidin-1-yl)-3,4-dihydroxy-tetrahydrofuran-2-yl)vinylsulfonylmethylphosphonic acid (20).** To a stirred solution of **18** (60 mg) in dichloromethane was added TMSBr (0.23 mL) drop wise at 0 °C under argon. The reaction mixture was stirred overnight at room temperature, and then it was evaporated. Working up with methanol gave compound **20** in quantitative yields. The residue was purified on reverse phase HPLC using methanol and water to give 80% of the desired product.  $[\alpha]_D^{24} = +33.3^\circ$  (c. 0.02, MeOH).  $^1H$  NMR (600 MHz,  $CH_3OD$ ):  $\delta$  7.55 (d,  $J = 8.4$  Hz, 1H, H-6), 6.98 (dd,  $J = 15.6, 5.4$  Hz, 1H, H-6'), 6.88 (dd,  $J = 15.6, 1.8$  Hz, 1H, H-5'), 5.81 (d,  $J = 1.7$  Hz, 1H, H-1'), 5.66 (d,  $J = 8.4$  Hz, 1H, H-5), 4.51 (m, 1H, H-4'), 4.17 (m, 1H, H-2'), 4.05 (m, 1H, H-3'), 3.72 (dd,  $J = 16.2, 3.8$  Hz, 2H,  $SCH_2P$ ).  $^{13}C$  NMR (150 MHz,  $CD_3OD$ ):  $\delta$  164.9, 151.0, 144.1, 141.9, 130.2, 102.1, 91.4, 91.2, 81.4, 73.2, 48.7. HRMS  $m/z$  calcd for  $C_{11}H_{15}N_2O_{10}PS$   $[M + Na]^+$  is 421.0083, found  $[M + Na]^+$ : 421.0093.

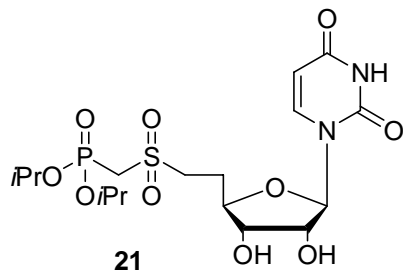

**Diisopropyl (2-((2*R*,3*R*,4*S*,5*R*)-5-(2,4-dioxo-3,4-dihydro-2*H*-pyrimidin-1-yl)-3,4-dihydroxy-tetrahydrofuran-2-yl)ethylsulfonyl)methylphosphonate (21).**

Compound **18** in abs. ethanol was hydrogenated (pressure 1 atm, 10% Pd/C) at room temperature for 3 h. Then, the catalyst was removed by filtration through celite, solvent evaporated in vacuum. The residue was chromatographed on silica-gel (ethyl acetate:MeOH:H<sub>2</sub>O = 6:0.5:0.5) to afford 43% of the main product **21**. It was purified on reverse phase HPLC using methanol and water. <sup>1</sup>H NMR (600 MHz, CH<sub>3</sub>OD): δ 7.60 (d, *J* = 12.0 Hz, 1H, H-6), 5.75 (d, *J* = 6.0 Hz, 1H, H-1'), 5.70 (d, *J* = 12.0 Hz, 1H, H-5), 4.78 (m, 2H, CH of isopropyl), 4.24 (m, 1H, H-2'), 3.96 (m, 2H, H-4', H-3'), 3.40-3.54 (m, 2H, H-6'), 2.13-2.29 (m, 2H, H-5'), 1.35 (d, *J* = 6.0 Hz, 12H, isopropyls). Protons between P and S (PCH<sub>2</sub>S) were exchanged with deuterium and not observed. <sup>13</sup>C NMR (150 MHz, CH<sub>3</sub>OD): δ 164.9, 151.0, 142.0, 105.0, 101.8, 91.4, 81.7, 73.2 (4-carbons), 48.0, 25.3, 23.2 (2-carbons), 22.9 (2-carbons). HRMS (MALDI) *m/z* calcd for C<sub>17</sub>H<sub>29</sub>N<sub>2</sub>O<sub>10</sub>PS [M + H]<sup>+</sup> is 485.1359, found [M + H]<sup>+</sup> 485.1355.

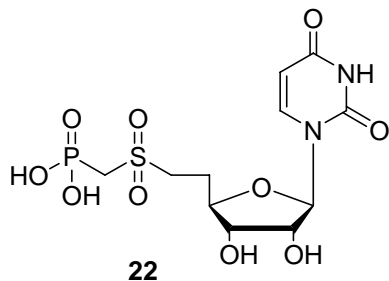

**(2-((2R,3R,4S,5R)-5-(2,4-dioxo-3,4-dihydro-2H-pyrimidin-1-yl)-3,4-dihydroxy-tetrahydrofuran-2-yl)ethylsulfonyl)methylphosphonic acid (22).** Compound **20** in abs. ethanol was hydrogenated (pressure 1 atm, 10% Pd/C) at room temperature for 3 h. Then, the catalyst was removed by filtration through celite. The contents were then concentrated in vacuo to give an oil product **22** in 65% yield. The residue was purified on reverse phase HPLC using methanol and water.  $[\alpha]_D^{24} = +12.5^\circ$  (c. 0.04, MeOH).  $^1\text{H NMR}$  (600 MHz,  $\text{CH}_3\text{OD}$ ):  $\delta$  7.51 (d,  $J = 8.4$  Hz, 1H, H-6), 5.67 (d,  $J = 1.7$  Hz, 1H, H-1'), 5.62 (d,  $J = 8.4$  Hz, 1H, H-5), 4.14 (m, 1H, H-2'), 3.88 (m, 1H, H-4'), 4.05 (m, 1H, H-3'), 3.31-3.48 (m, 2H, H-6'), 2.03-2.23 (m, 2H, H-5'). Protons between P and S (PCH<sub>2</sub>S) were exchanged with deuterium and not observed.  $^{13}\text{C NMR}$  (150 MHz,  $\text{CH}_3\text{OD}$ ):  $\delta$  164.1, 151.0, 141.9, 101.8, 91.3, 81.8, 73.55, 73.29, 50.8, 48.37, 25.4. HRMS (MALDI)  $m/z$  calcd for  $\text{C}_{11}\text{H}_{17}\text{N}_2\text{O}_{10}\text{PS}$   $[\text{M} + \text{H}]^+$  is 401.0419, found  $[\text{M} + \text{H}]^+$  401.0411.

### NmCSS Substrate Assay:

The reaction mixtures (20  $\mu\text{L}$ ) in Tris-HCl buffer (200 mM, pH 8.5) containing purified *Neisseria meningitidis* CSS recombinant enzyme (0.09  $\mu\text{g}$ ),<sup>5</sup> CTP (1 mM), CDP (1 mM), UDP (1 mM), or UTP (1 mM), and *N*-acetylneuraminic acid

(Neu5Ac, 1 mM) and MgCl<sub>2</sub> (20 mM) were incubated at 37 °C for 30 min and the reactions were stopped by adding 10% SDS on ice to give a final concentration of 1% SDS. The samples were analyzed using a P/ACE™ MDQ Capillary Electrophoresis System equipped with a UV detector at 200 nm wavelength. The percentage conversion for the formation of CMP-Neu5Ac was calculated based on UV response standard curve of CTP and CMP-Neu5Ac obtained using mixtures of different ratios of CTP and CMP-Neu5Ac (data not shown). The reaction was also carried out at higher enzyme concentrations (7.5 mg, data not shown).

#### **NmCSS Inhibition Assay:**

The reaction mixtures (20 uL) in Tris-HCl buffer (200 mM, pH 8.5) containing purified *Neisseria meningitidis* CSS recombinant enzyme (1.25 ng),<sup>5</sup> CTP (1 mM), *N*-acetylneuraminic acid (Neu5Ac, 1 mM), MgCl<sub>2</sub> (20 mM), with or without an inhibitor (1 mM) were incubated at 37 °C for 15 min and the reactions were stopped by adding 10% SDS on ice to give a final concentration of 1% SDS. The samples were analyzed using a P/ACE™ MDQ Capillary Electrophoresis System equipped with a UV detector at 254 nm wavelength. The percentage conversion for the formation of CMP-Neu5Ac was calculated based on UV response standard curve of CTP and CMP-Neu5Ac obtained using mixtures of different ratios of CTP and CMP-Neu5Ac (data not shown).

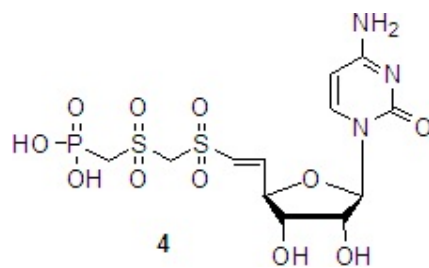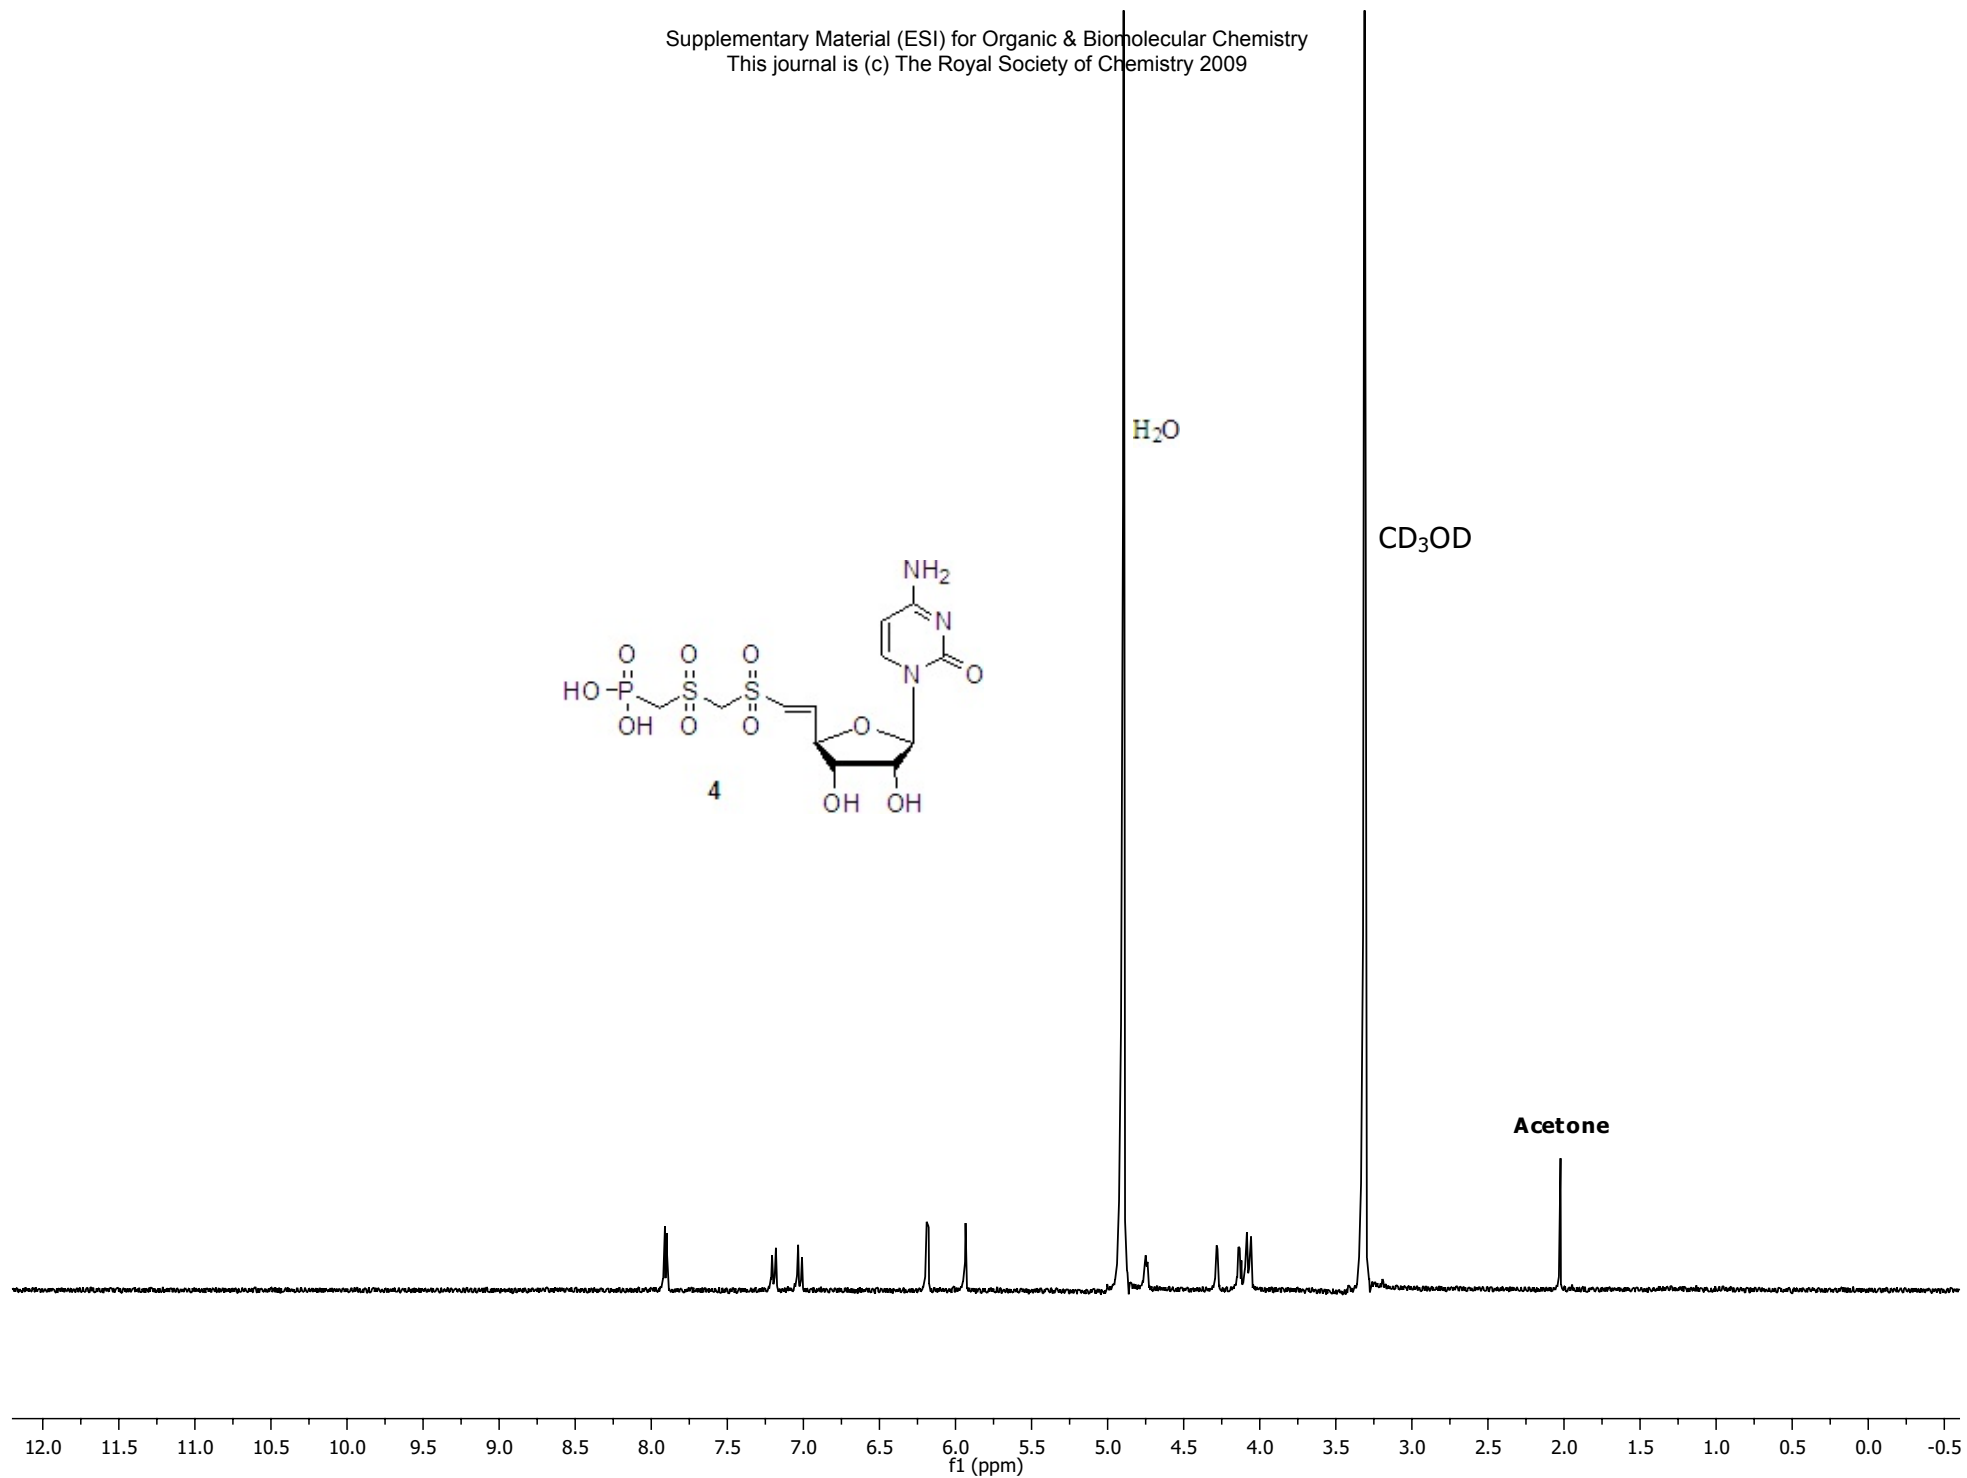



C-13 14.1T  
1H dec & NOE  
JWV248  
data collected in ExpNo 11  
converted to analog and LPbc  
Proc 2: more SI points, LB=2

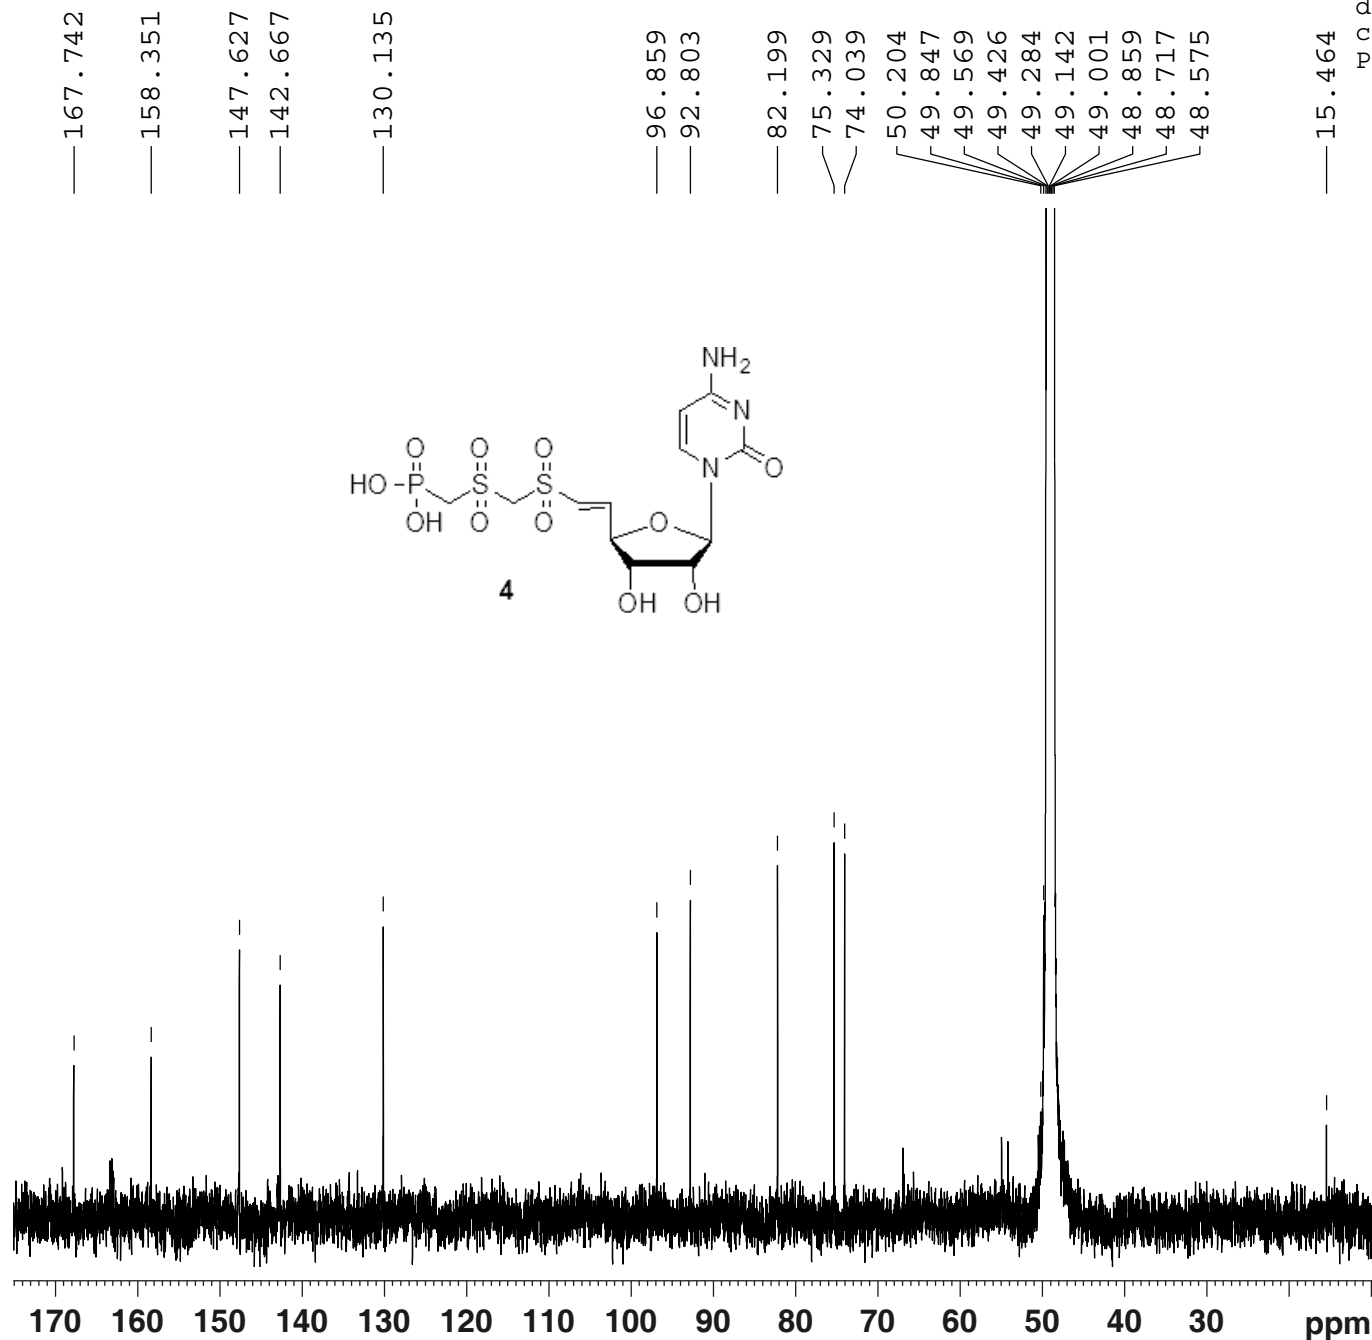

```

NAME          JWong_082108
EXPNO         21
PROCNO        2
Date_         20080821
Time          11.42
INSTRUM       spect
PROBHD        5 mm CPTCI 1H-
PULPROG       zgdc
TD            65400
SOLVENT       MeOD
NS            30000
DS            4
SWH           33333.332 Hz
FIDRES        0.509684 Hz
AQ            0.9810500 sec
RG            912
DW            15.000 usec
DE            30.00 usec
TE            293.0 K
D1            1.50000000 sec
D11           0.03000000 sec
TD0           1
    
```

```

===== CHANNEL f1 =====
NUC1          13C
P1            6.00 usec
PL1           -0.40 dB
PL1W          105.21154022 W
SFO1          150.9179000 MHz
    
```

```

===== CHANNEL f2 =====
CPDPRG2       garp
NUC2          1H
PCPD2         80.00 usec
PL2           3.00 dB
PL12          24.41 dB
PL2W          8.72435284 W
PL12W         0.06305699 W
SFO2          600.1324006 MHz
SI            262144
SF            150.9025973 MHz
WDW           EM
SSB           0
LB            2.00 Hz
GB            0
PC            1.40
    
```

1025-3 #3-8 RT: 0.04-0.13 AV: 6 NL: 7.90E6

T: FTMS + c NSI Full ms [200.00-1000.00]

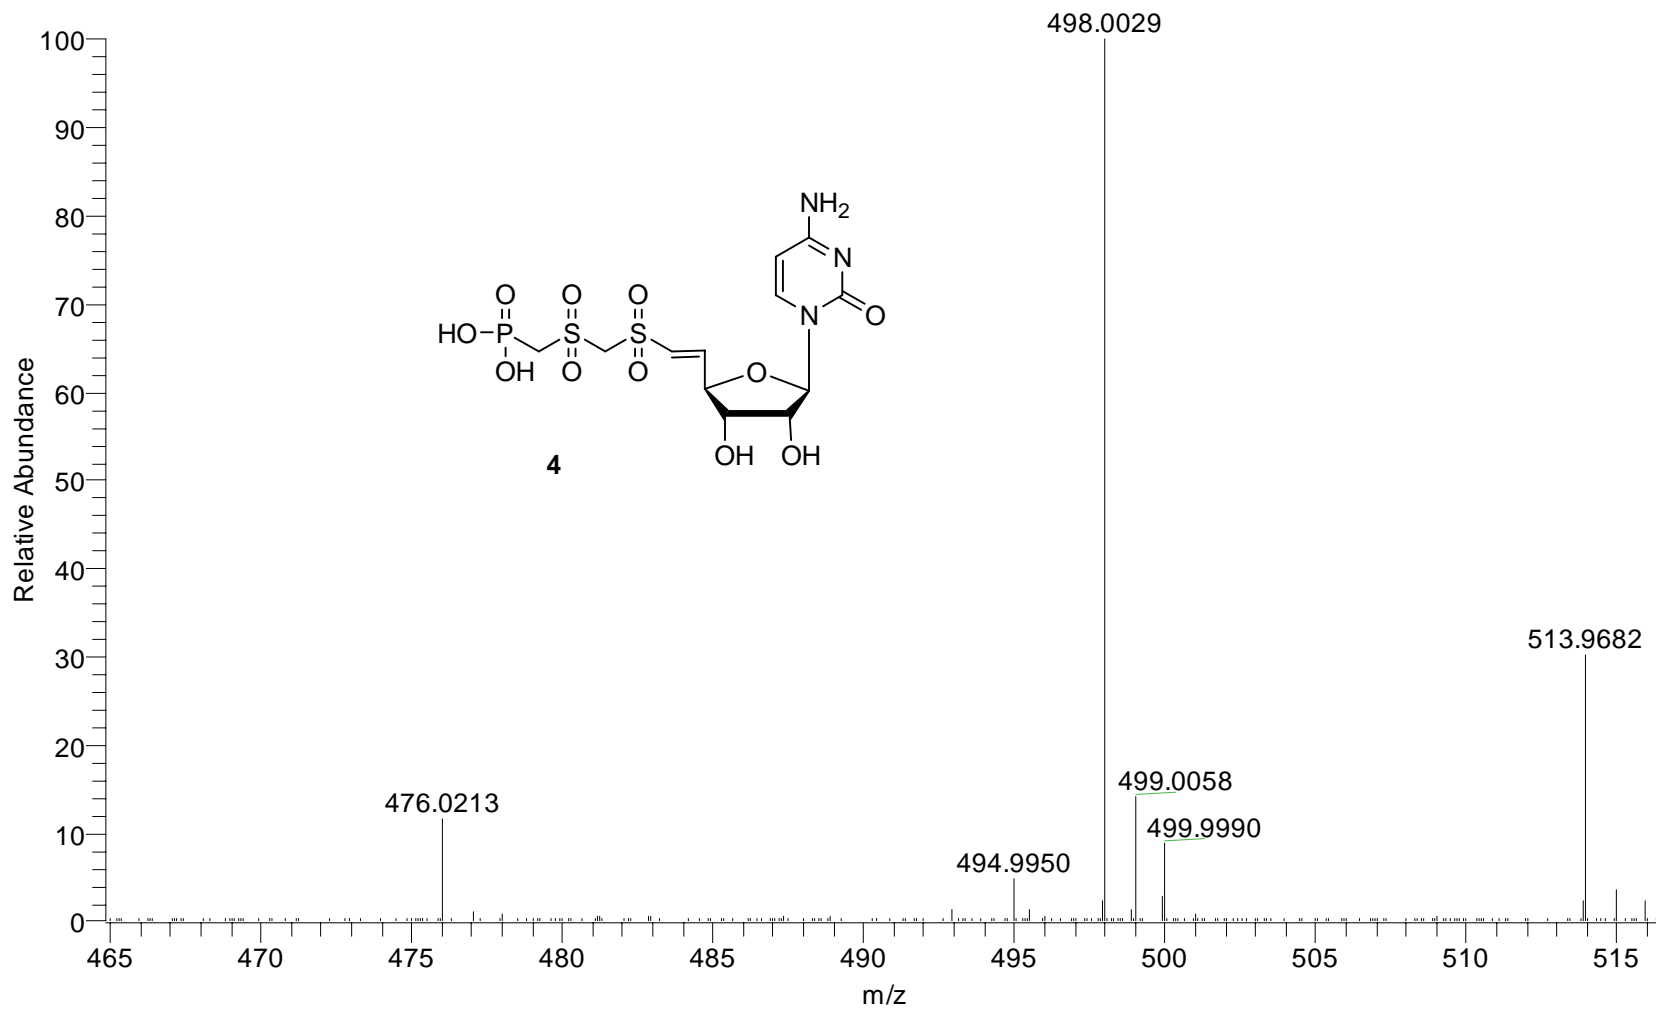

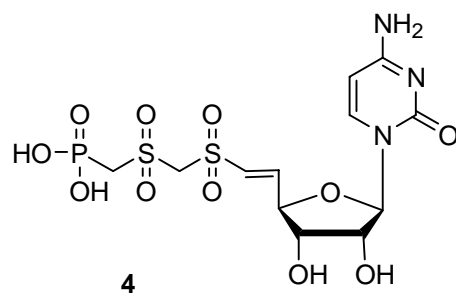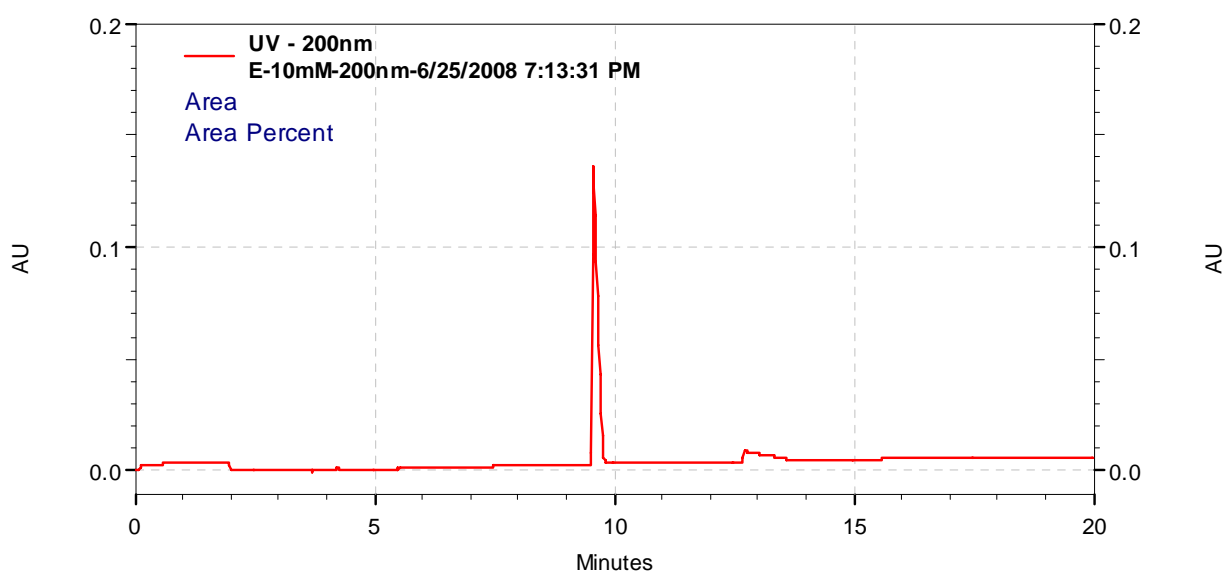

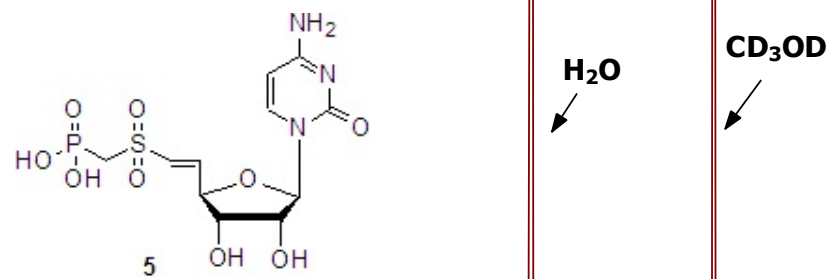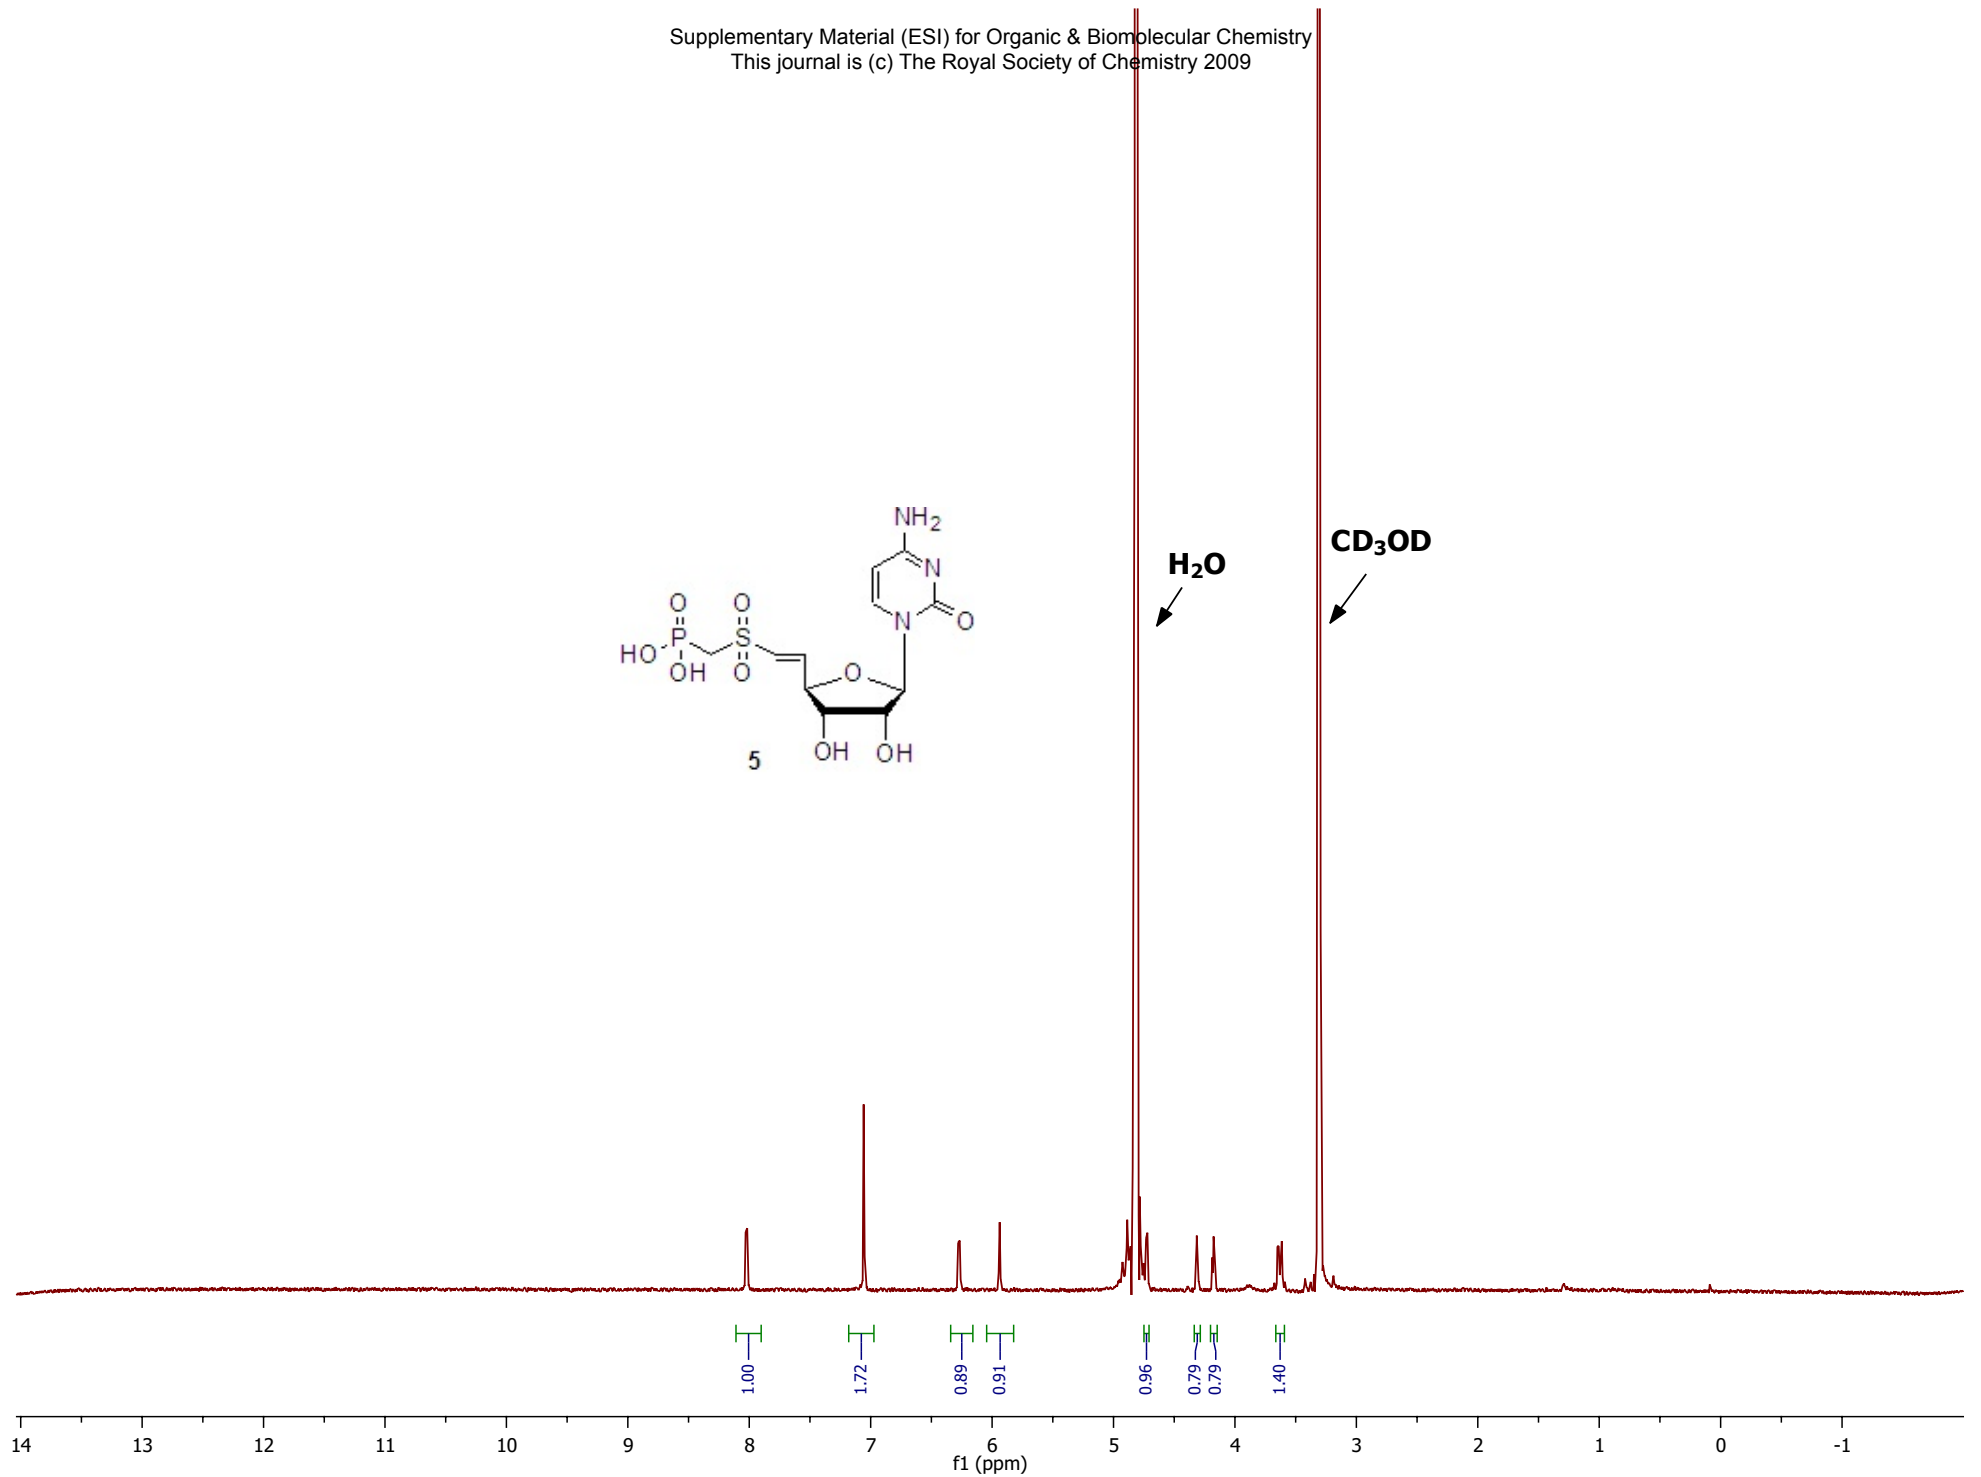

Std proton

Supplementary Material (ESI) for Organic & Biomolecular Chemistry  
This journal is (c) The Royal Society of Chemistry 2009

Automation directory:

Pulse Sequence: s2pul

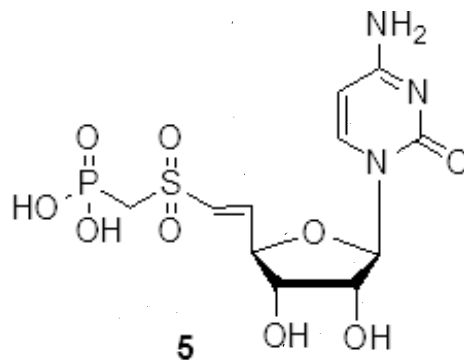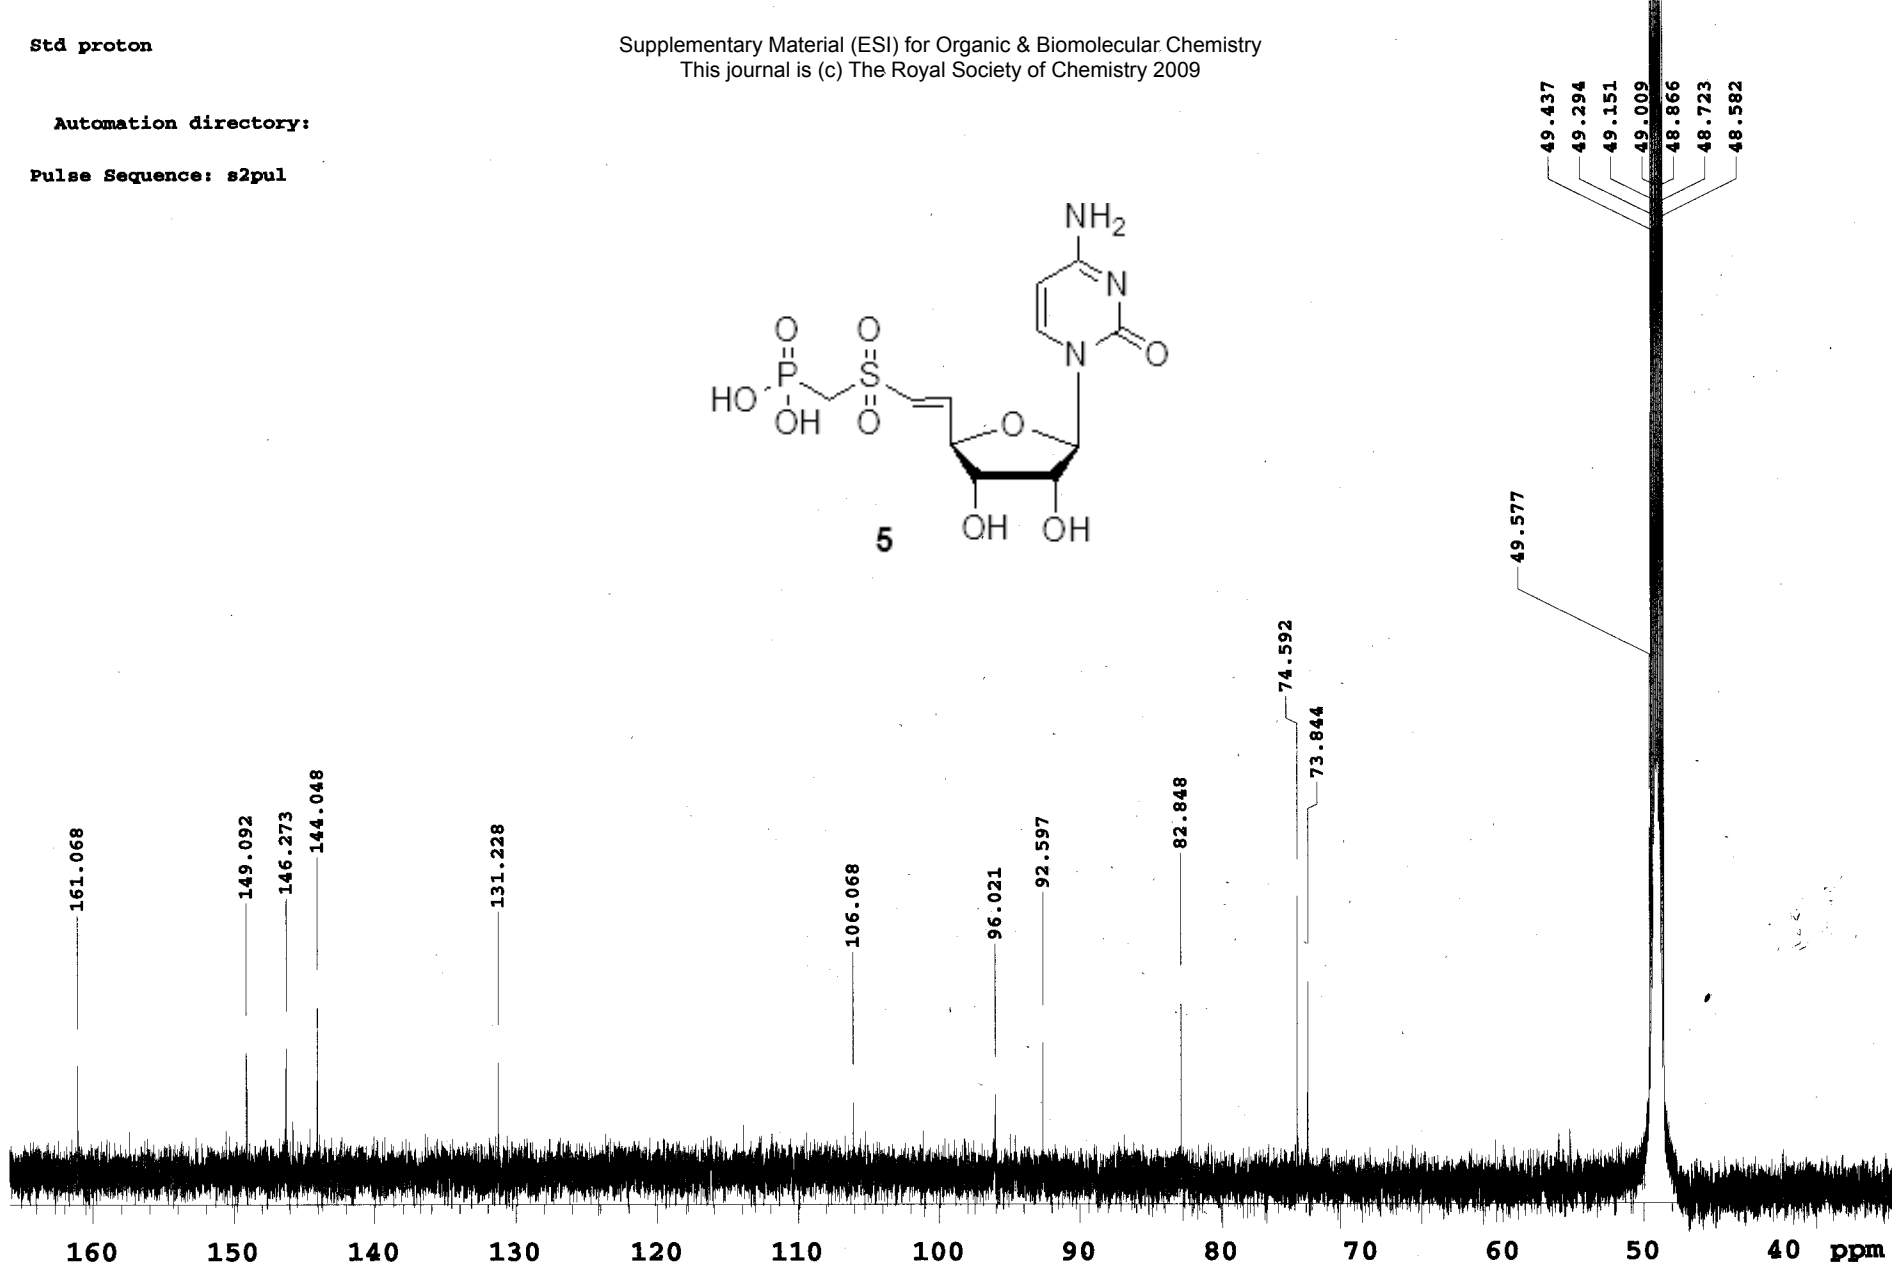

1020-3 #12-19 RT: 0.17-0.27 AV: 8 NL: 2.02E7

T: FTMS + c NSI Full ms [200.00-1000.00]

# JWV 182

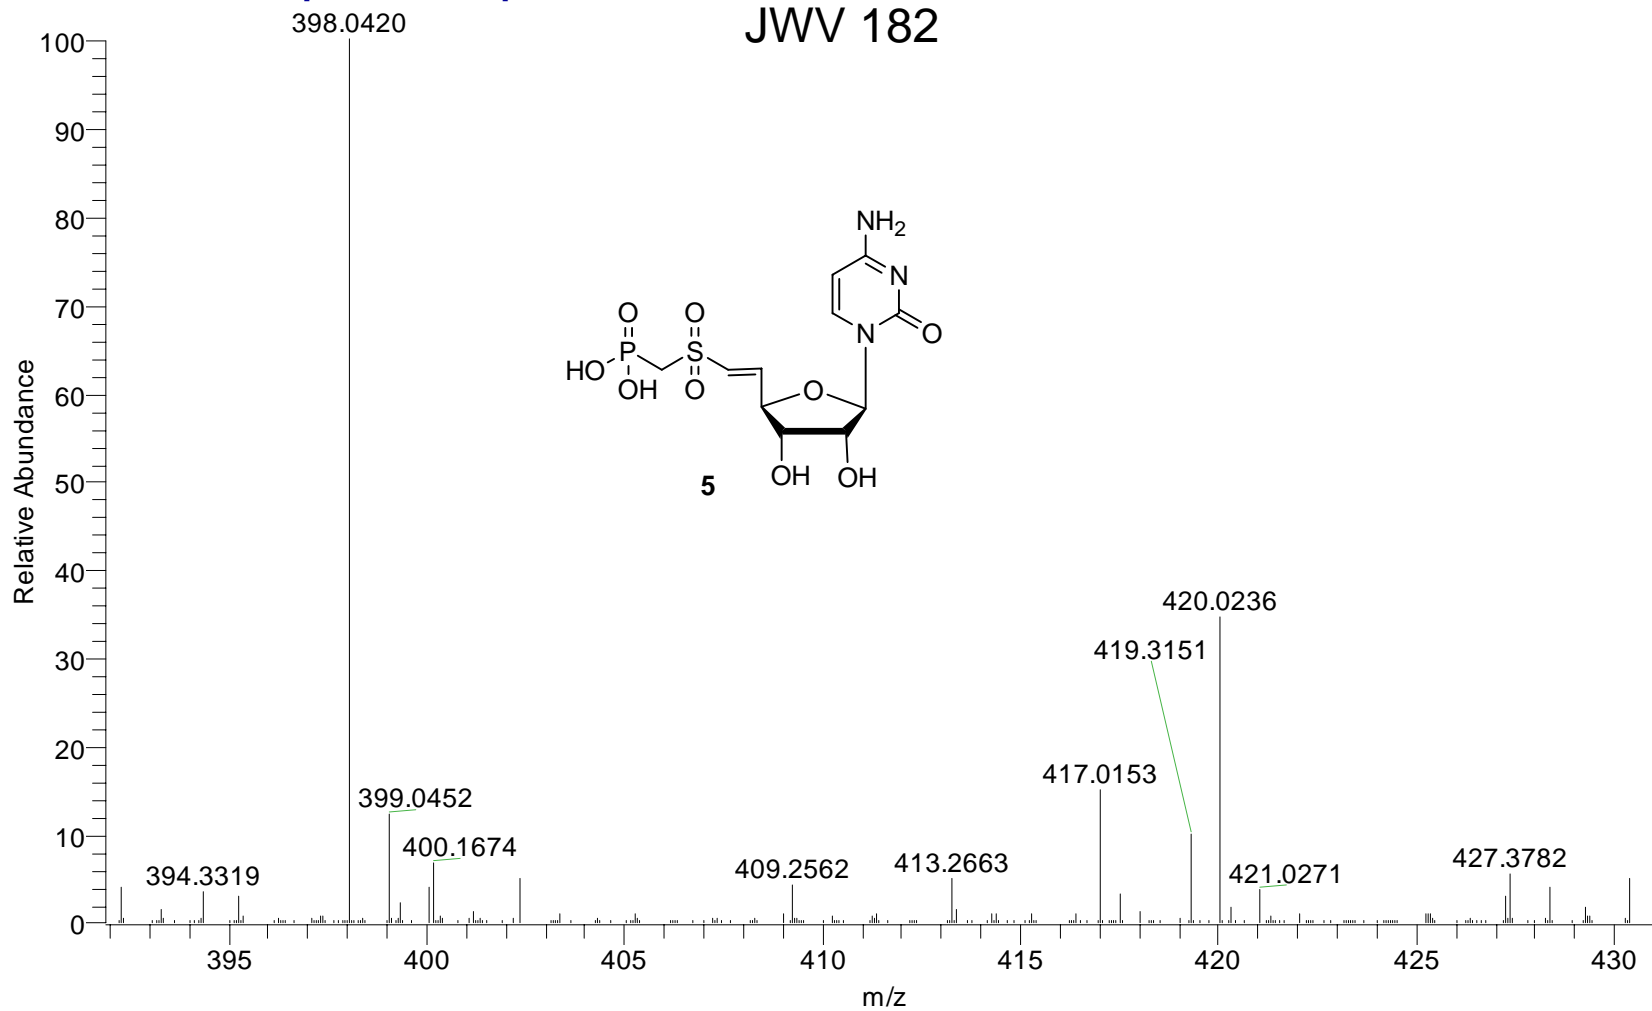

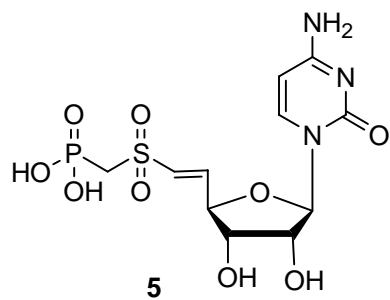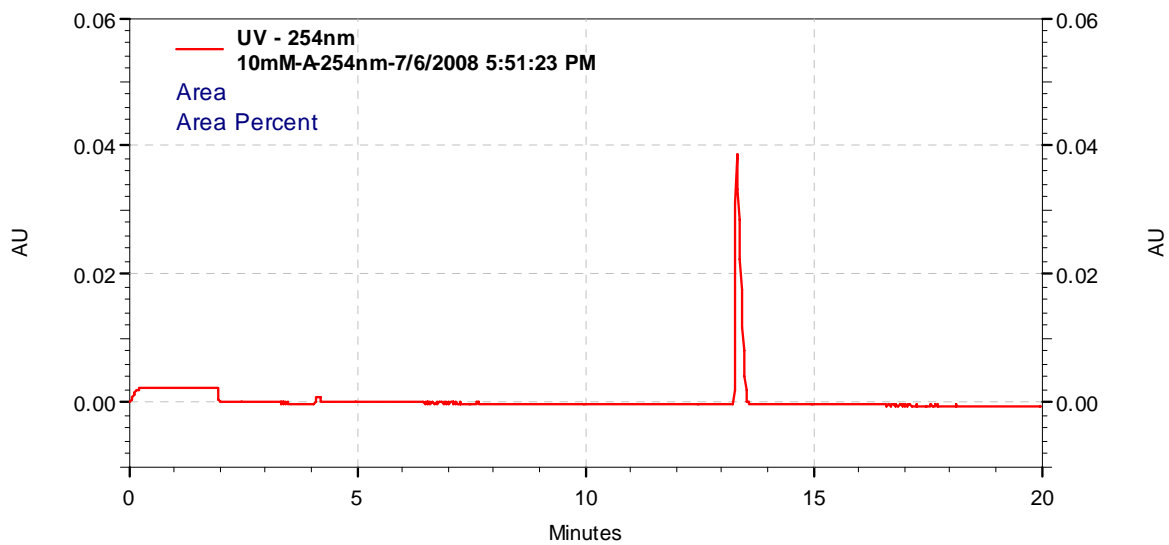

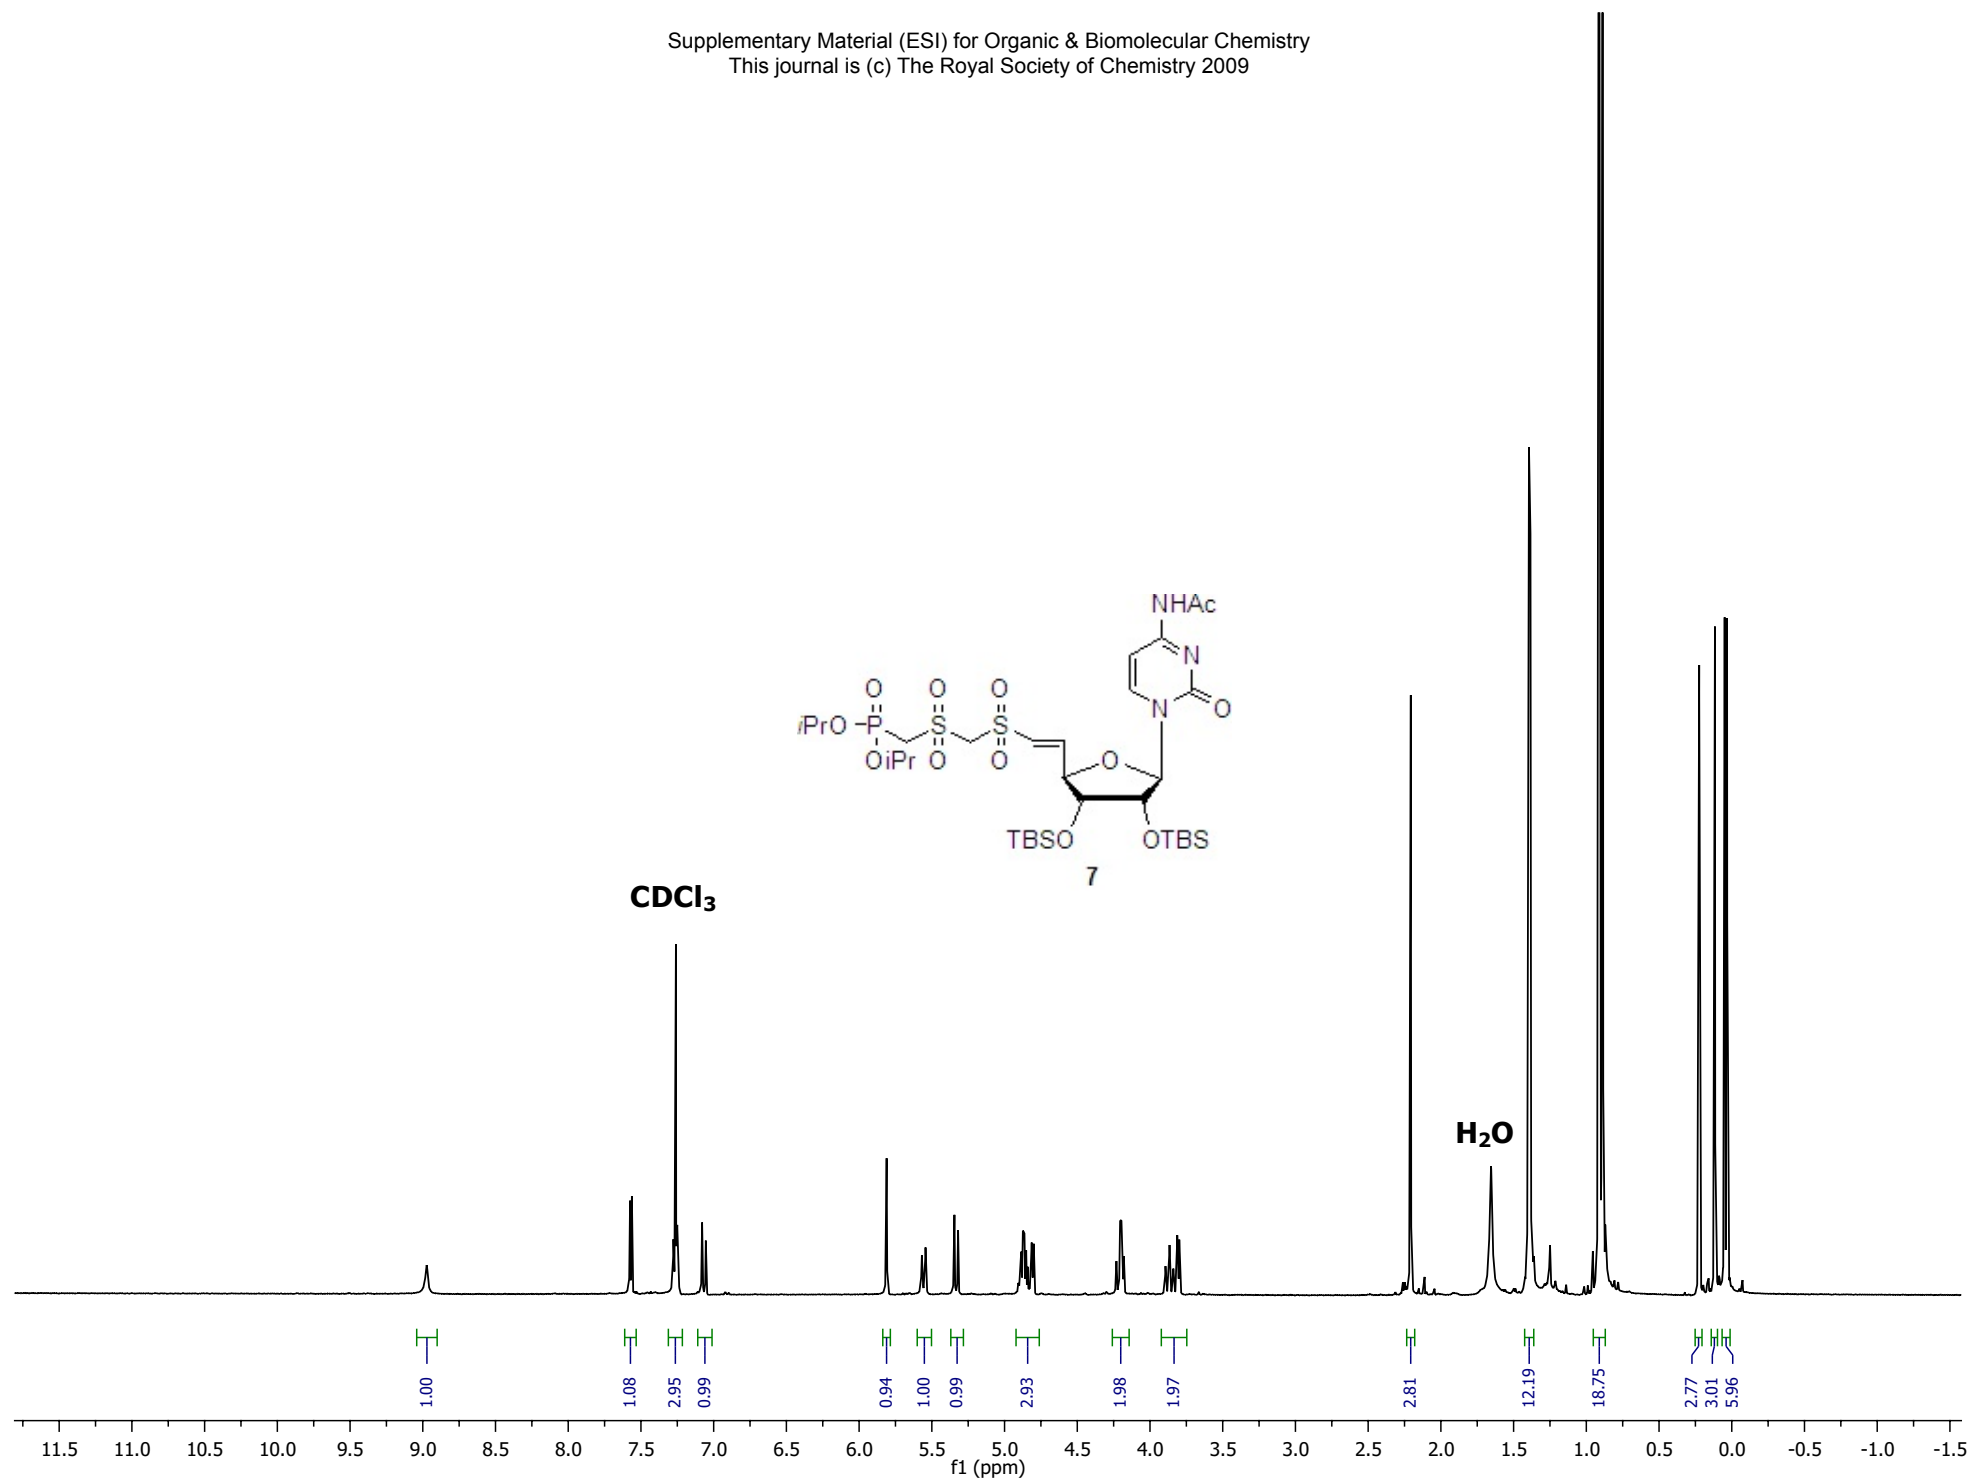



Std proton

Archive directory:  
Sample directory:  
File: CARBON

Pulse Sequence: s2pul

Solvent: cdcl3  
Temp. 22.0 C / 295.1 K

Operator: gervay  
VNMR5-600 "localhost.localdomain"

Relax. delay 2.000 sec

Pulse 45.0 degrees

Acq. time 1.300 sec

Width 36764.7 Hz

960 repetitions

OBSERVE C13, 150.8178083 MHz

DECOUPLE H1, 599.7950532 MHz

Power 44 dB

continuously on

WALTZ-16 modulated

DATA PROCESSING

Line broadening 1.0 Hz

FT size 131072

Total time 1 hr, 50 min, 25 sec

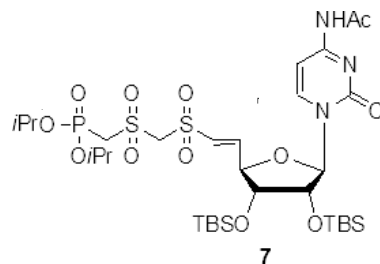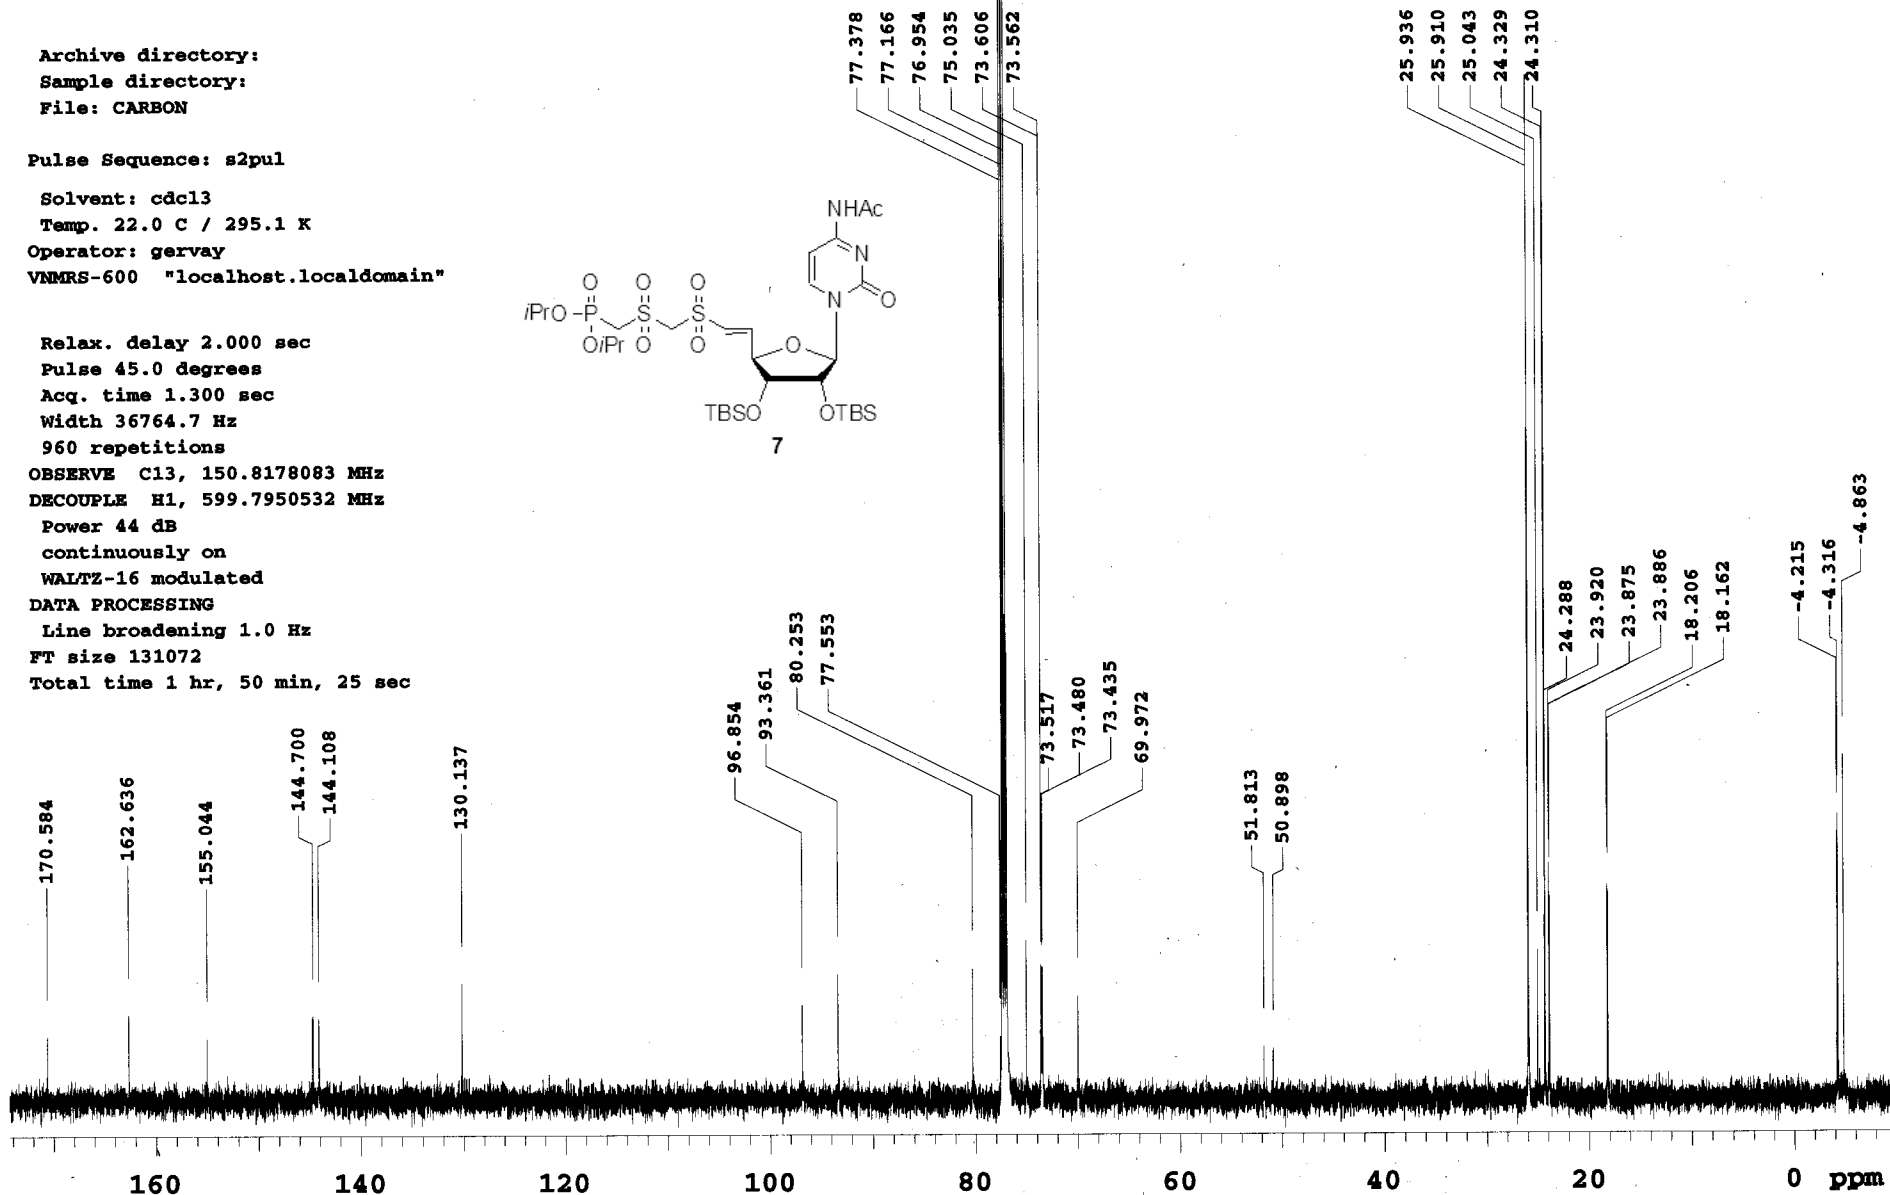

1062 #15-19 RT: 0.23-0.29 AV: 5 NL: 3.86E7

T: FTMS + c ESI Full ms [250.00-1000.00]

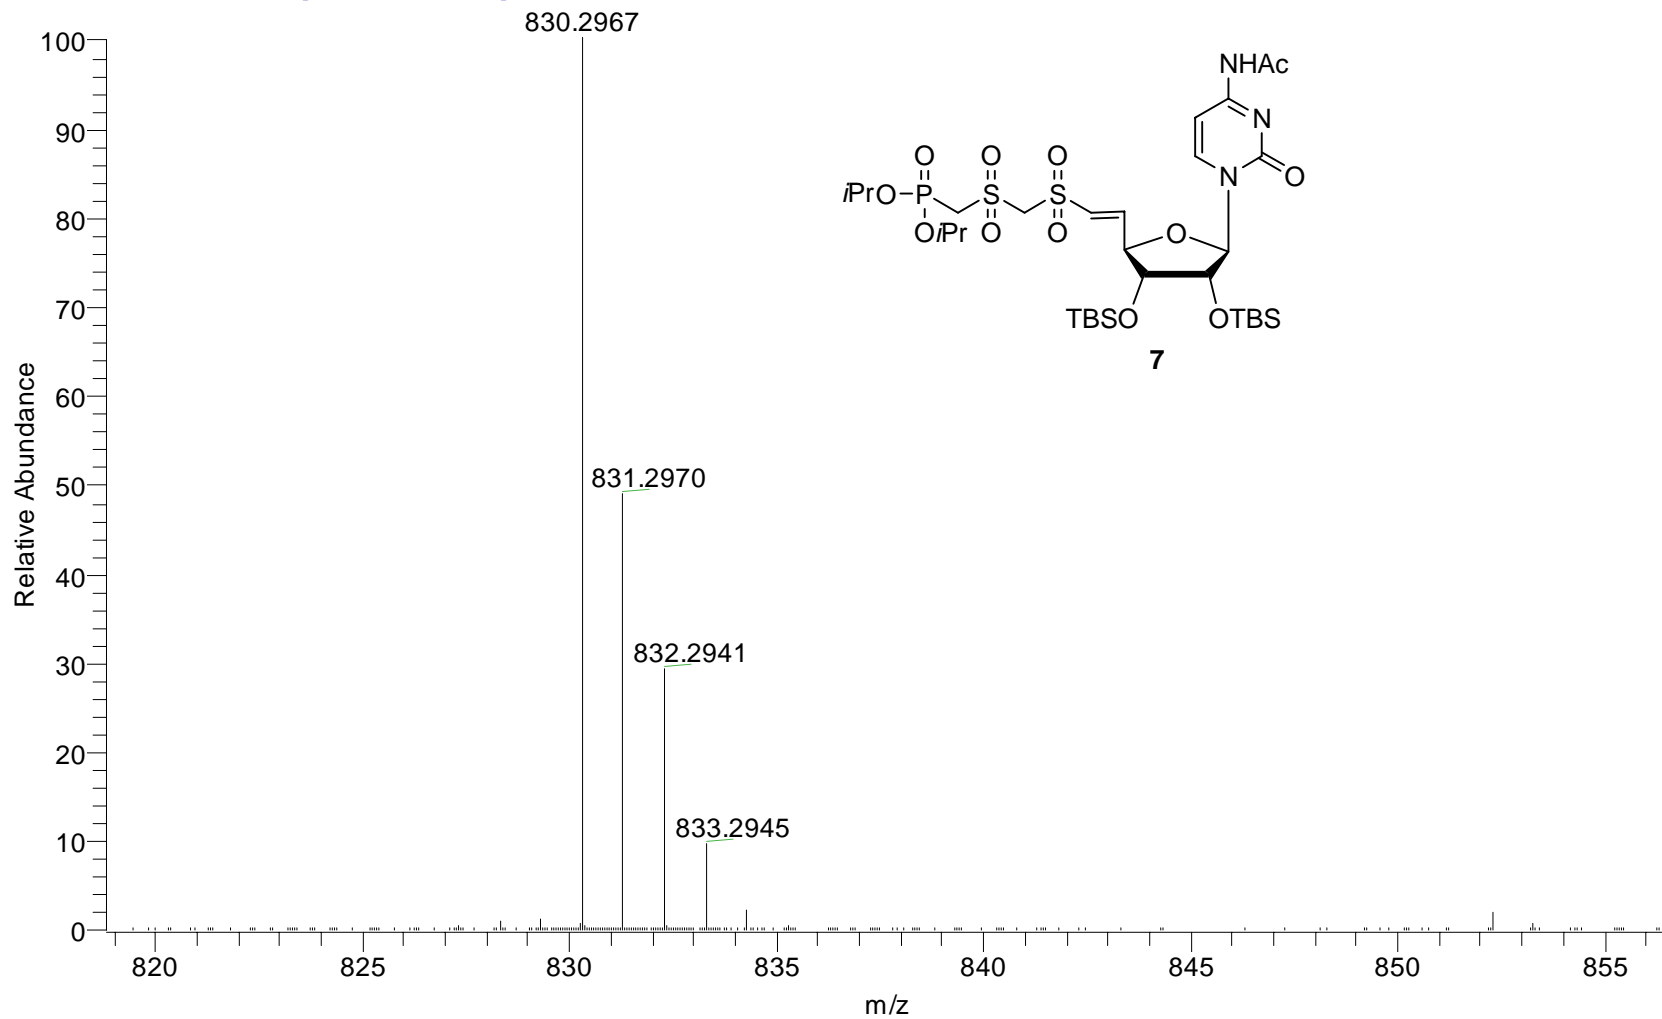

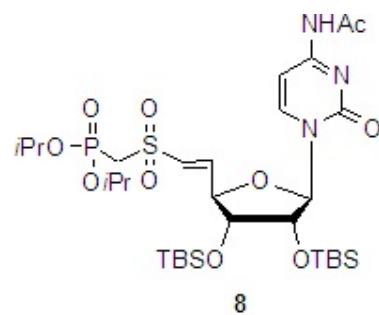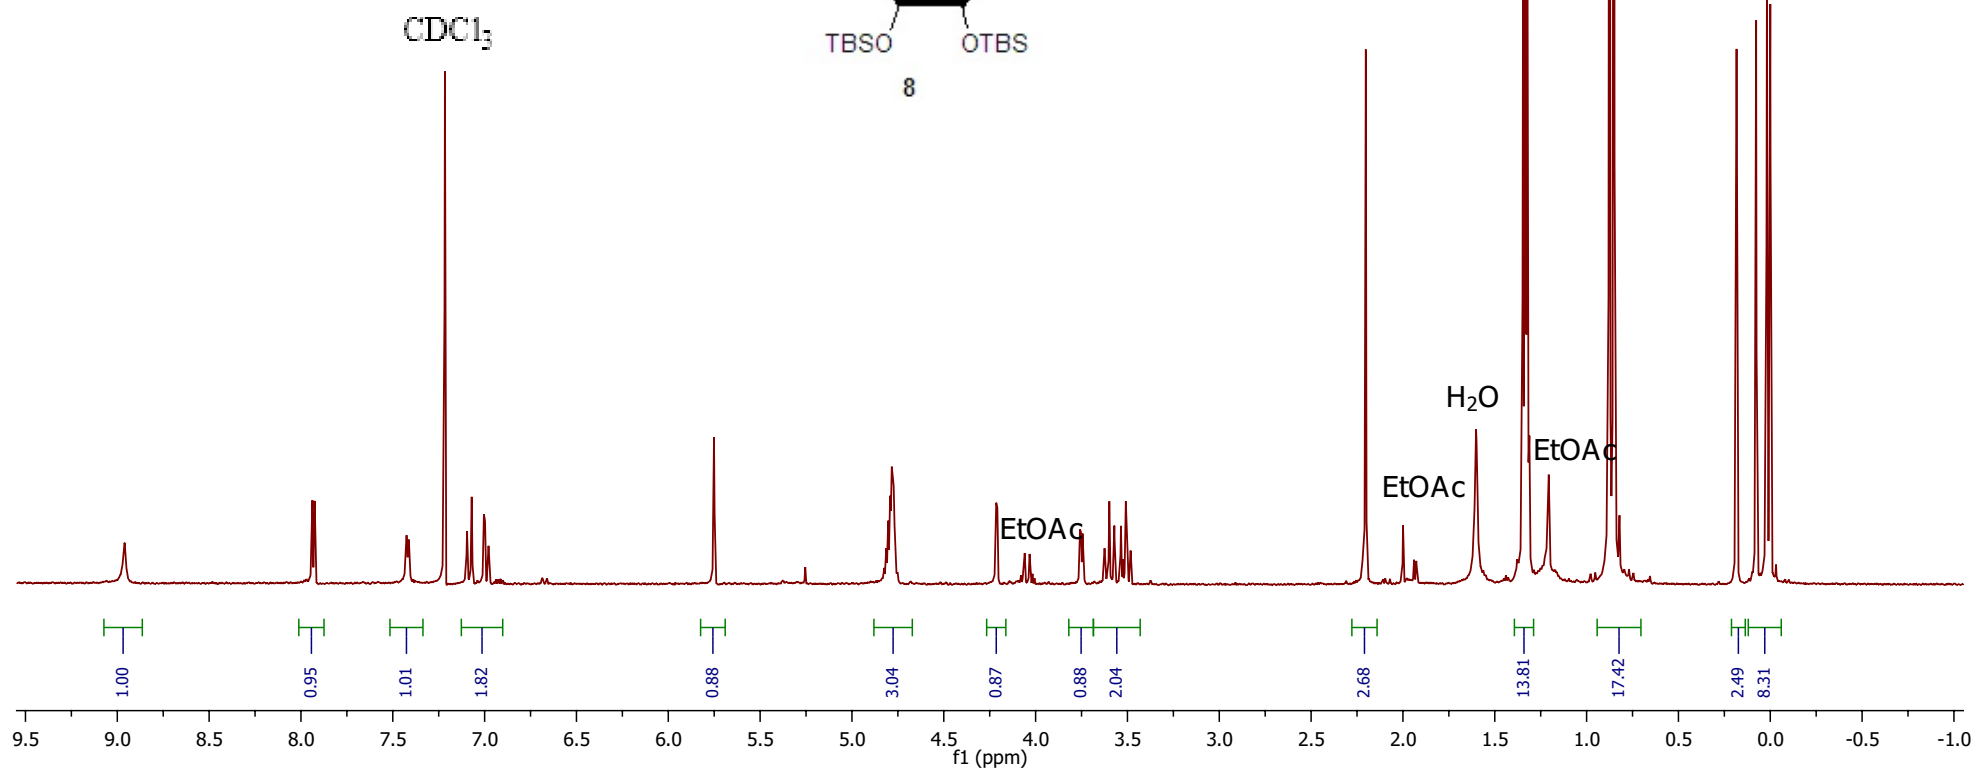

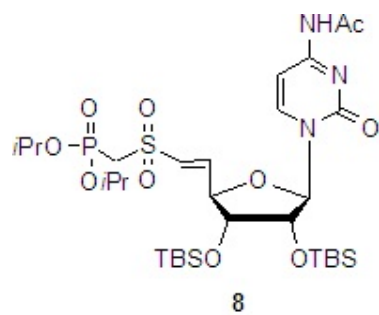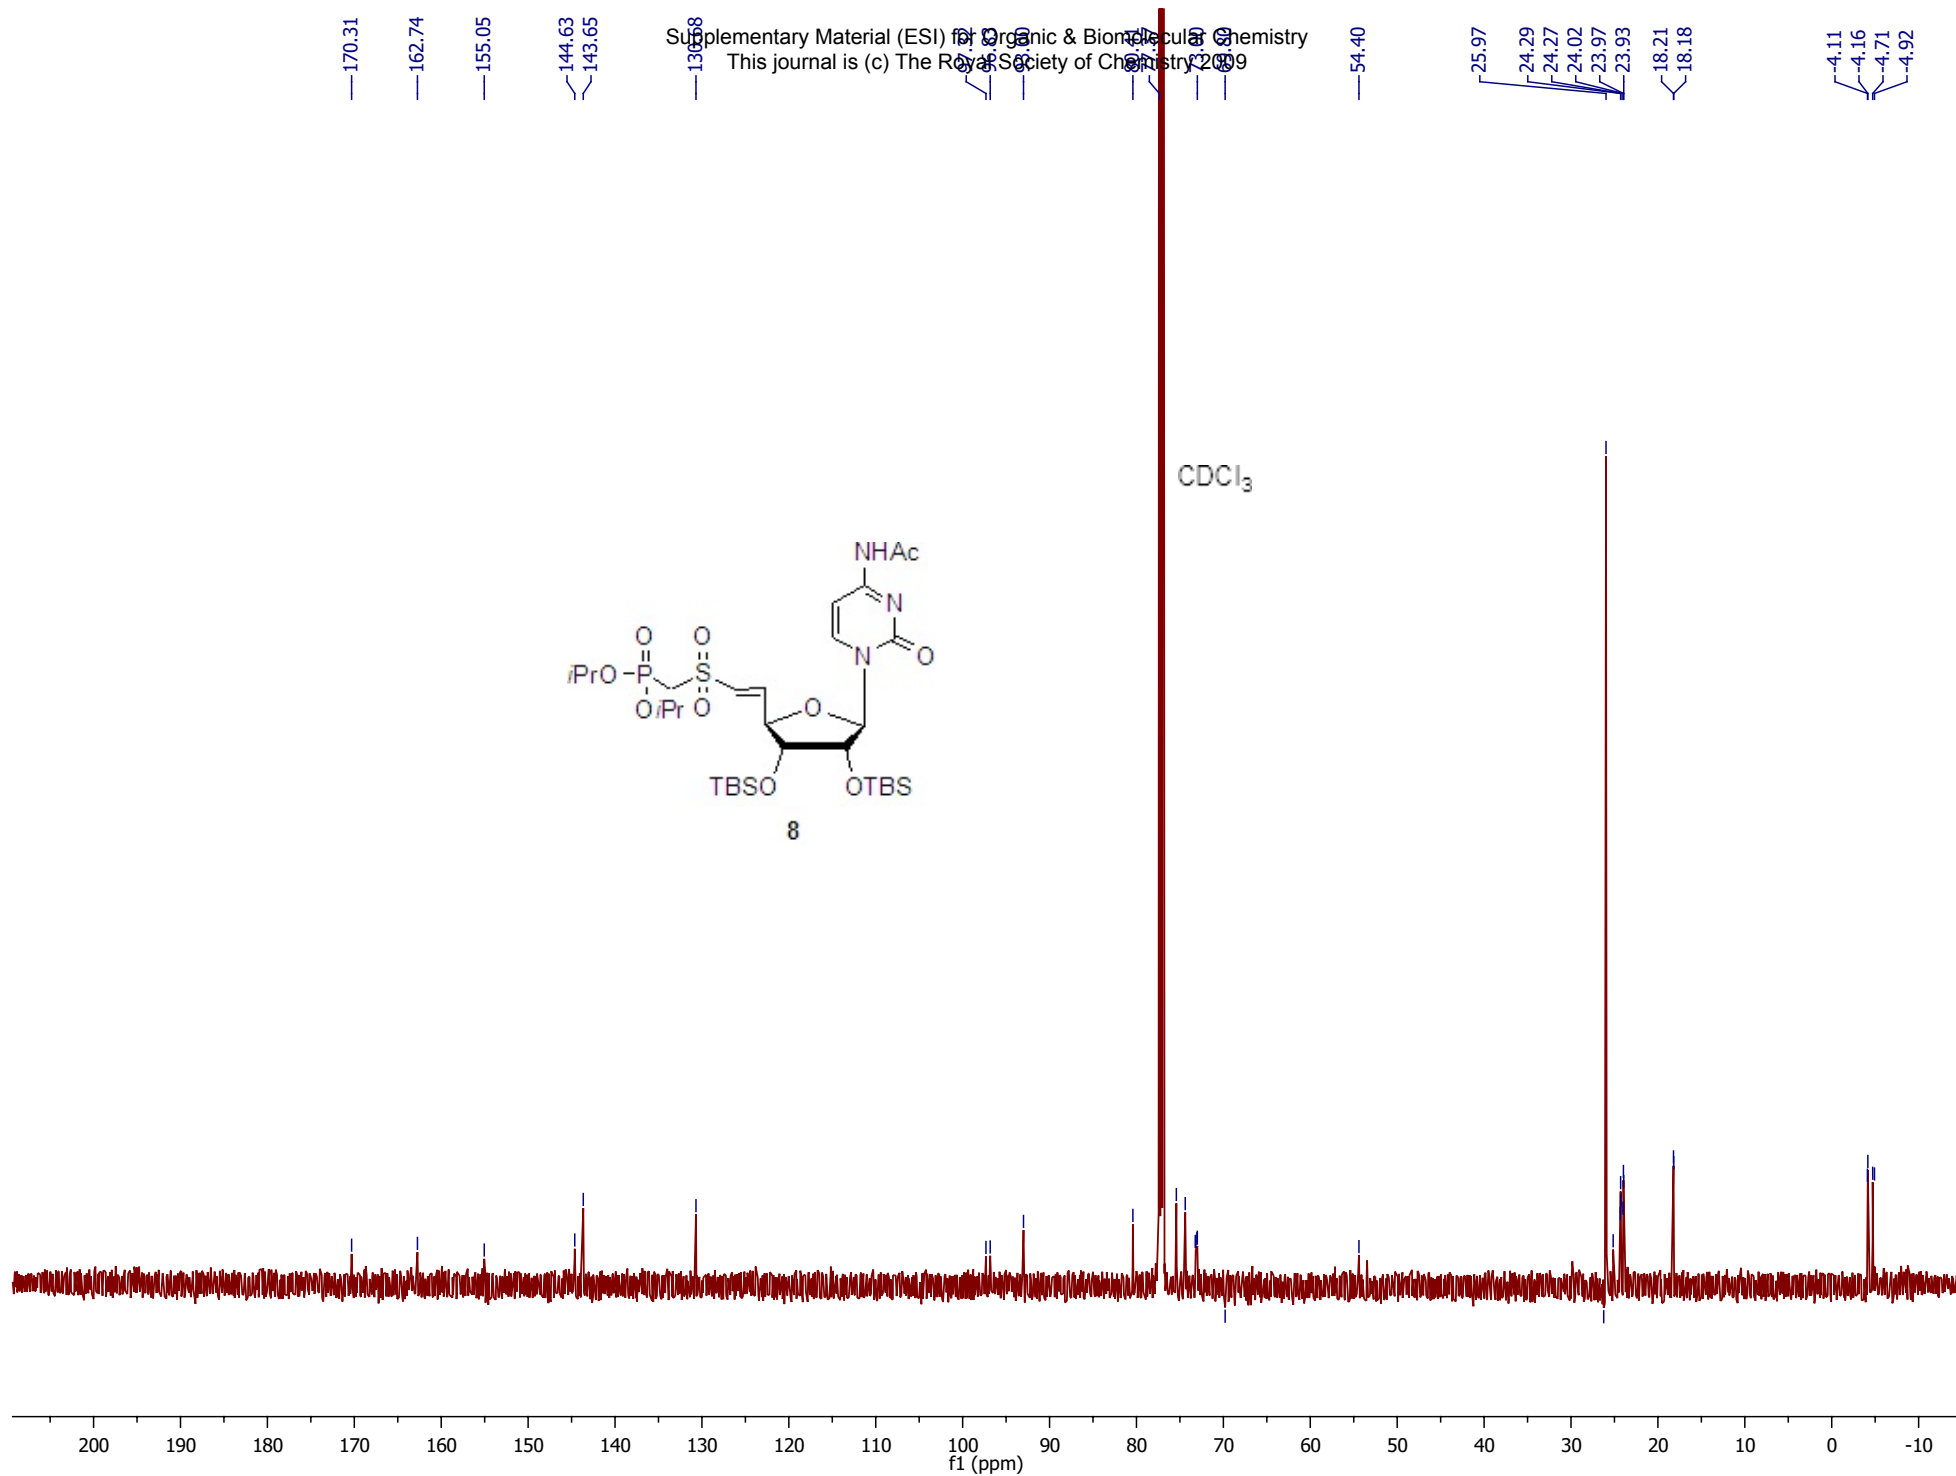

1061 #7-10 RT: 0.10-0.15 AV: 4 NL: 1.24E8

T: FTMS + c ESI Full ms [250.00-1000.00]

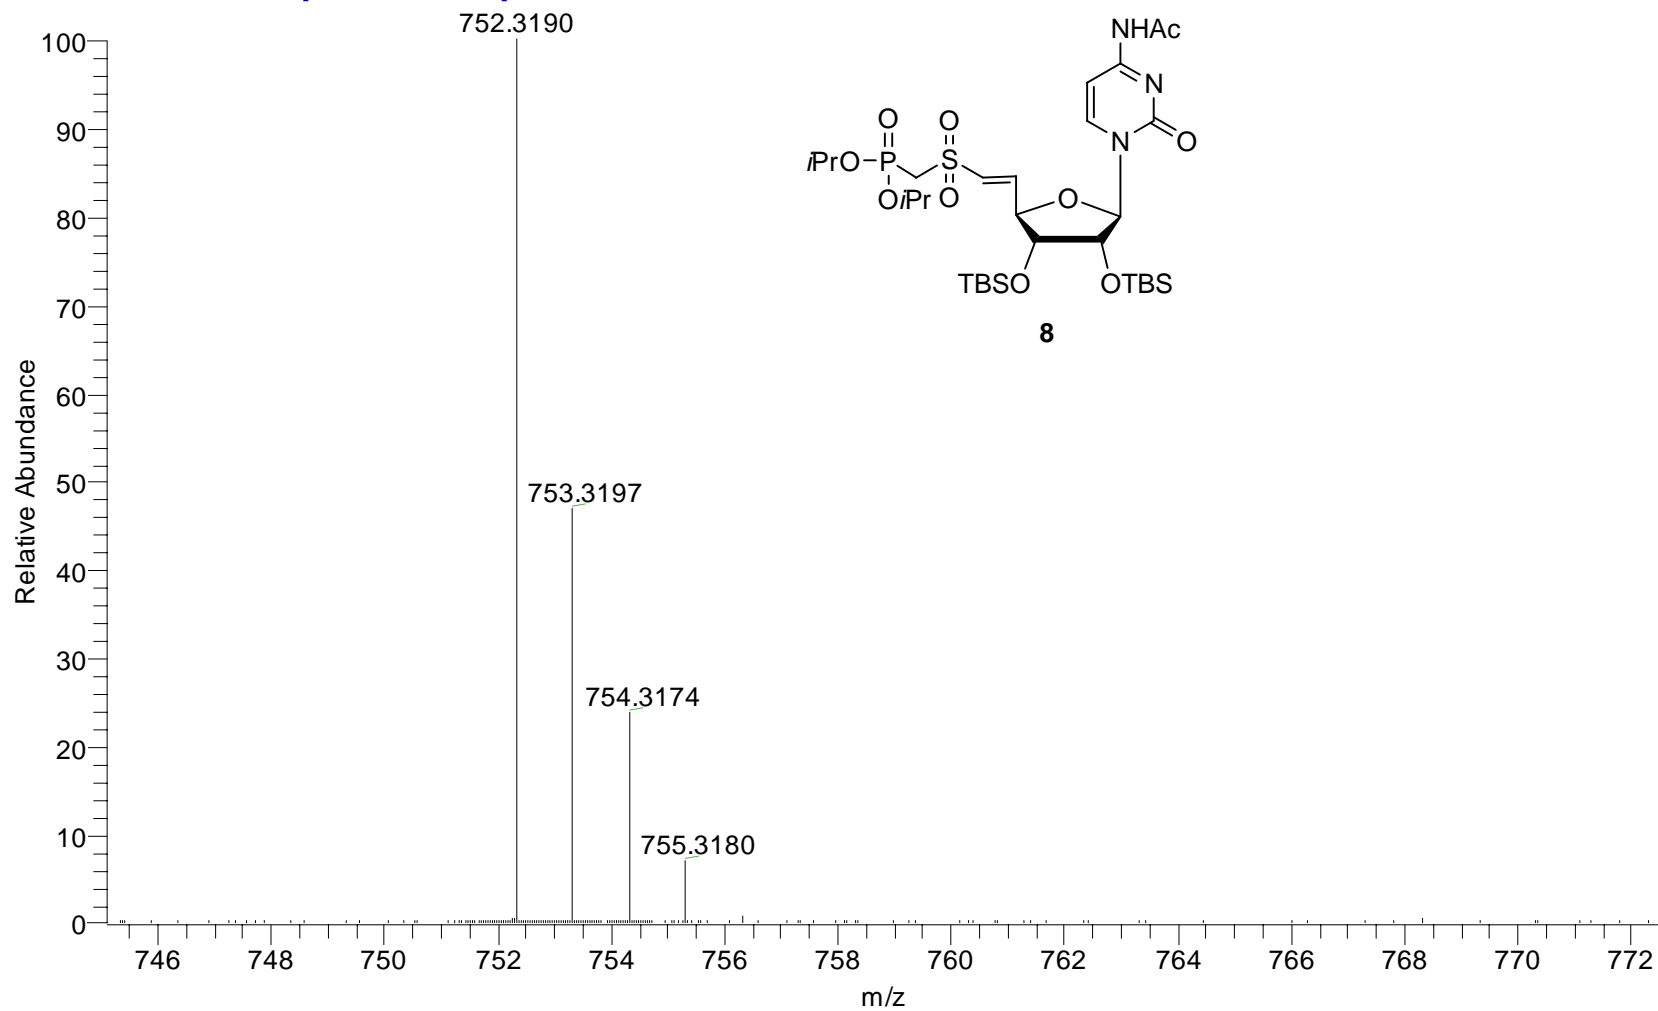

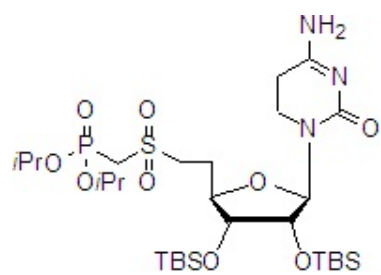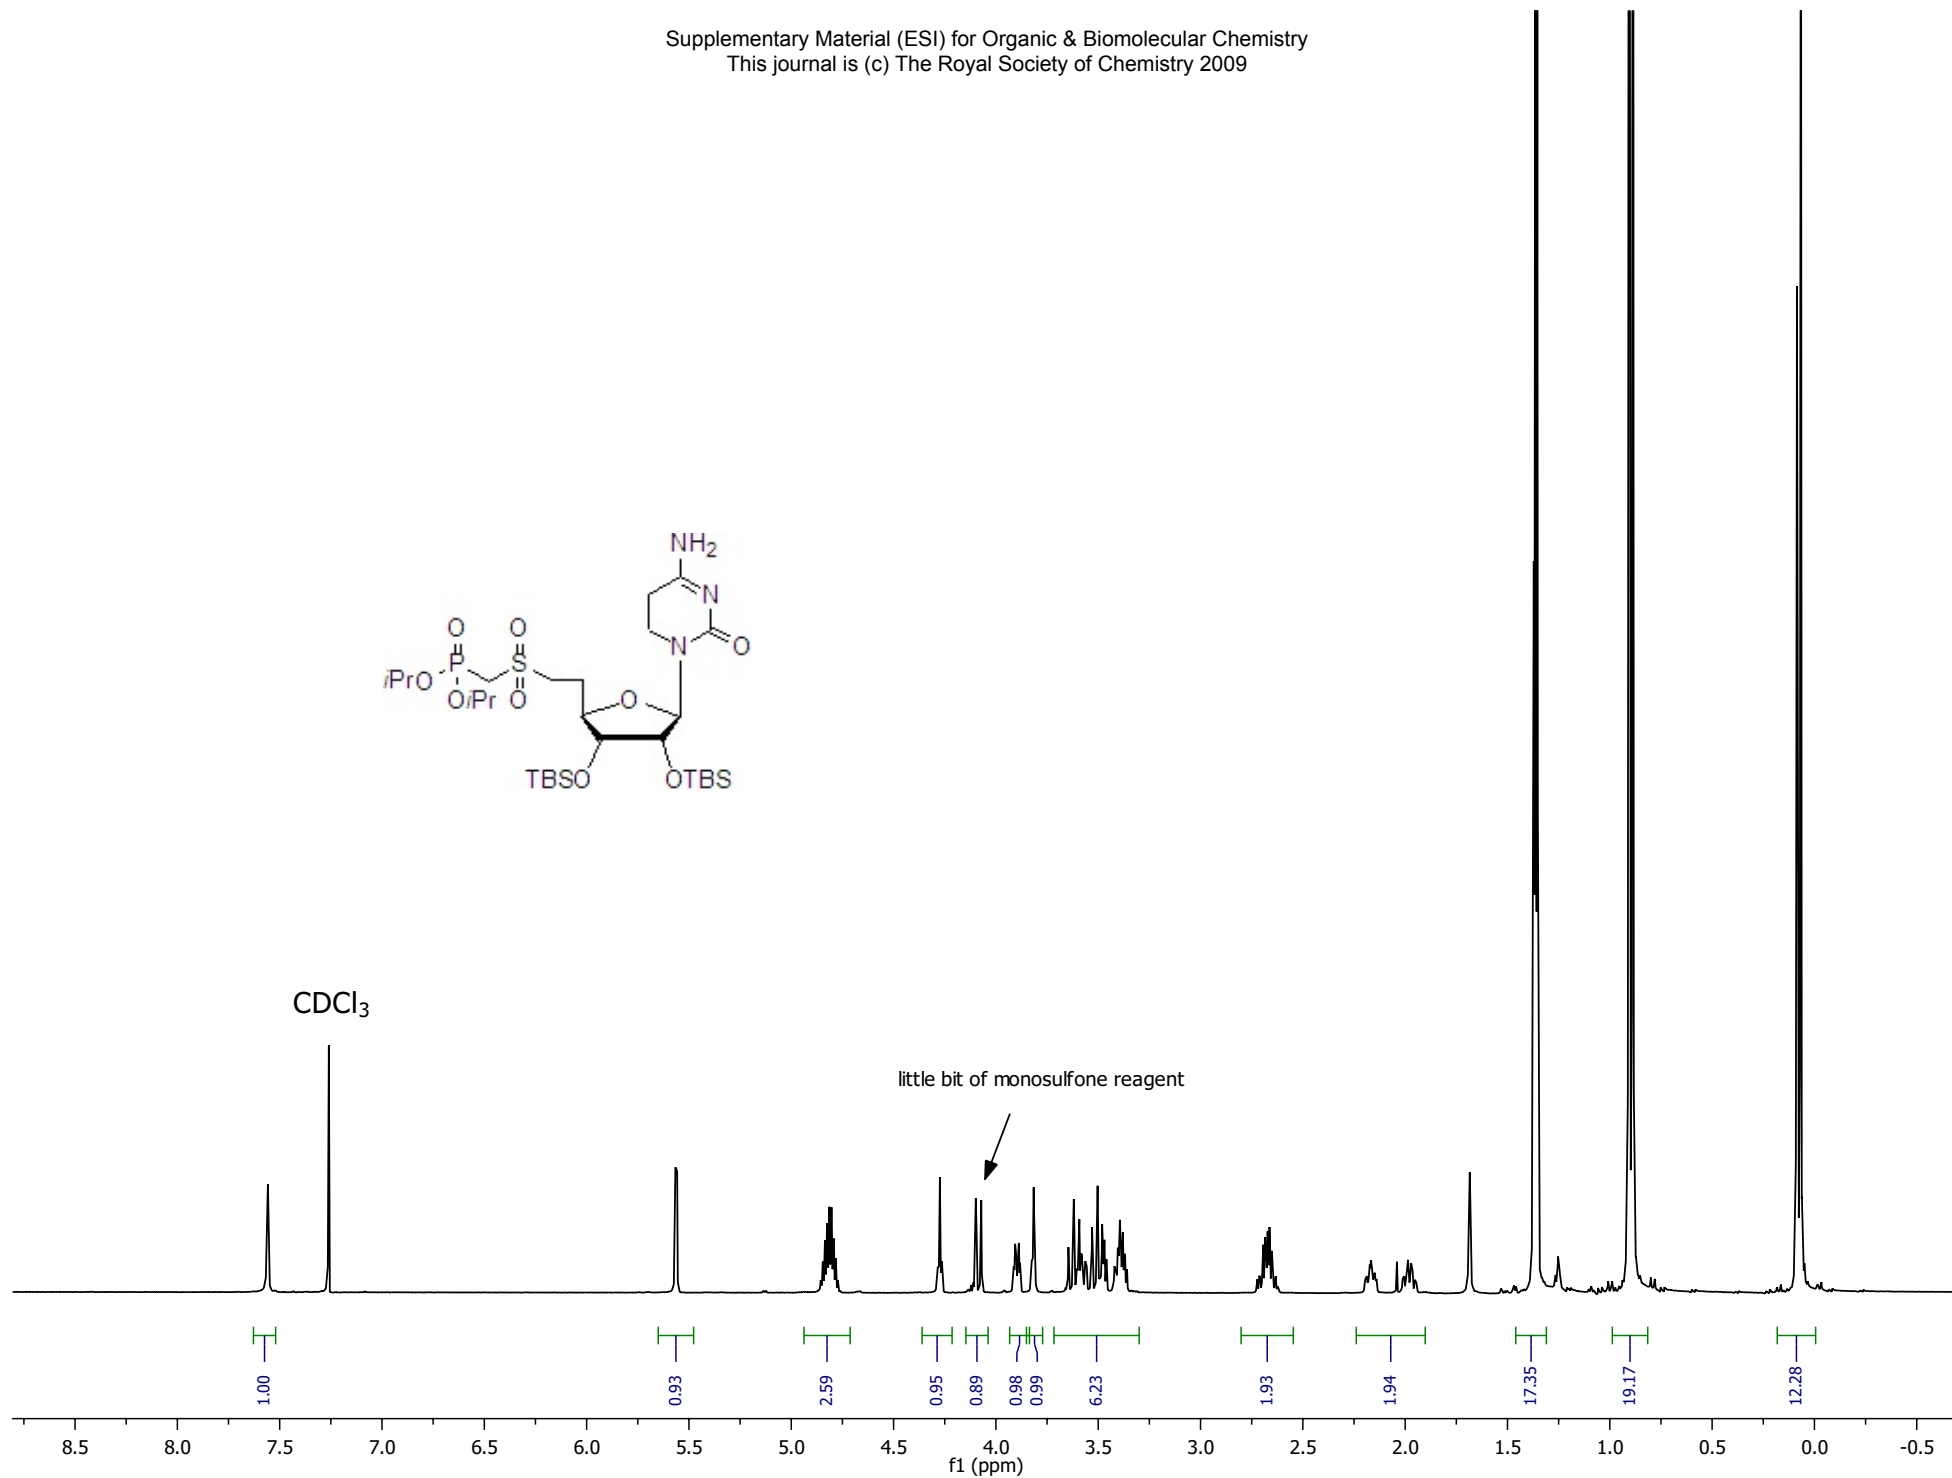

169.49

152.39

77.00

76.84

72.74

72.68

52.10

51.44

51.17

39.27

31.28

29.82

23.85

18.12

14.32

4.18

4.27

4.47

4.50

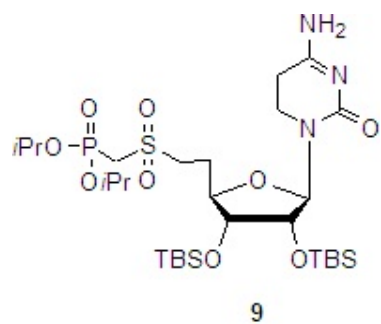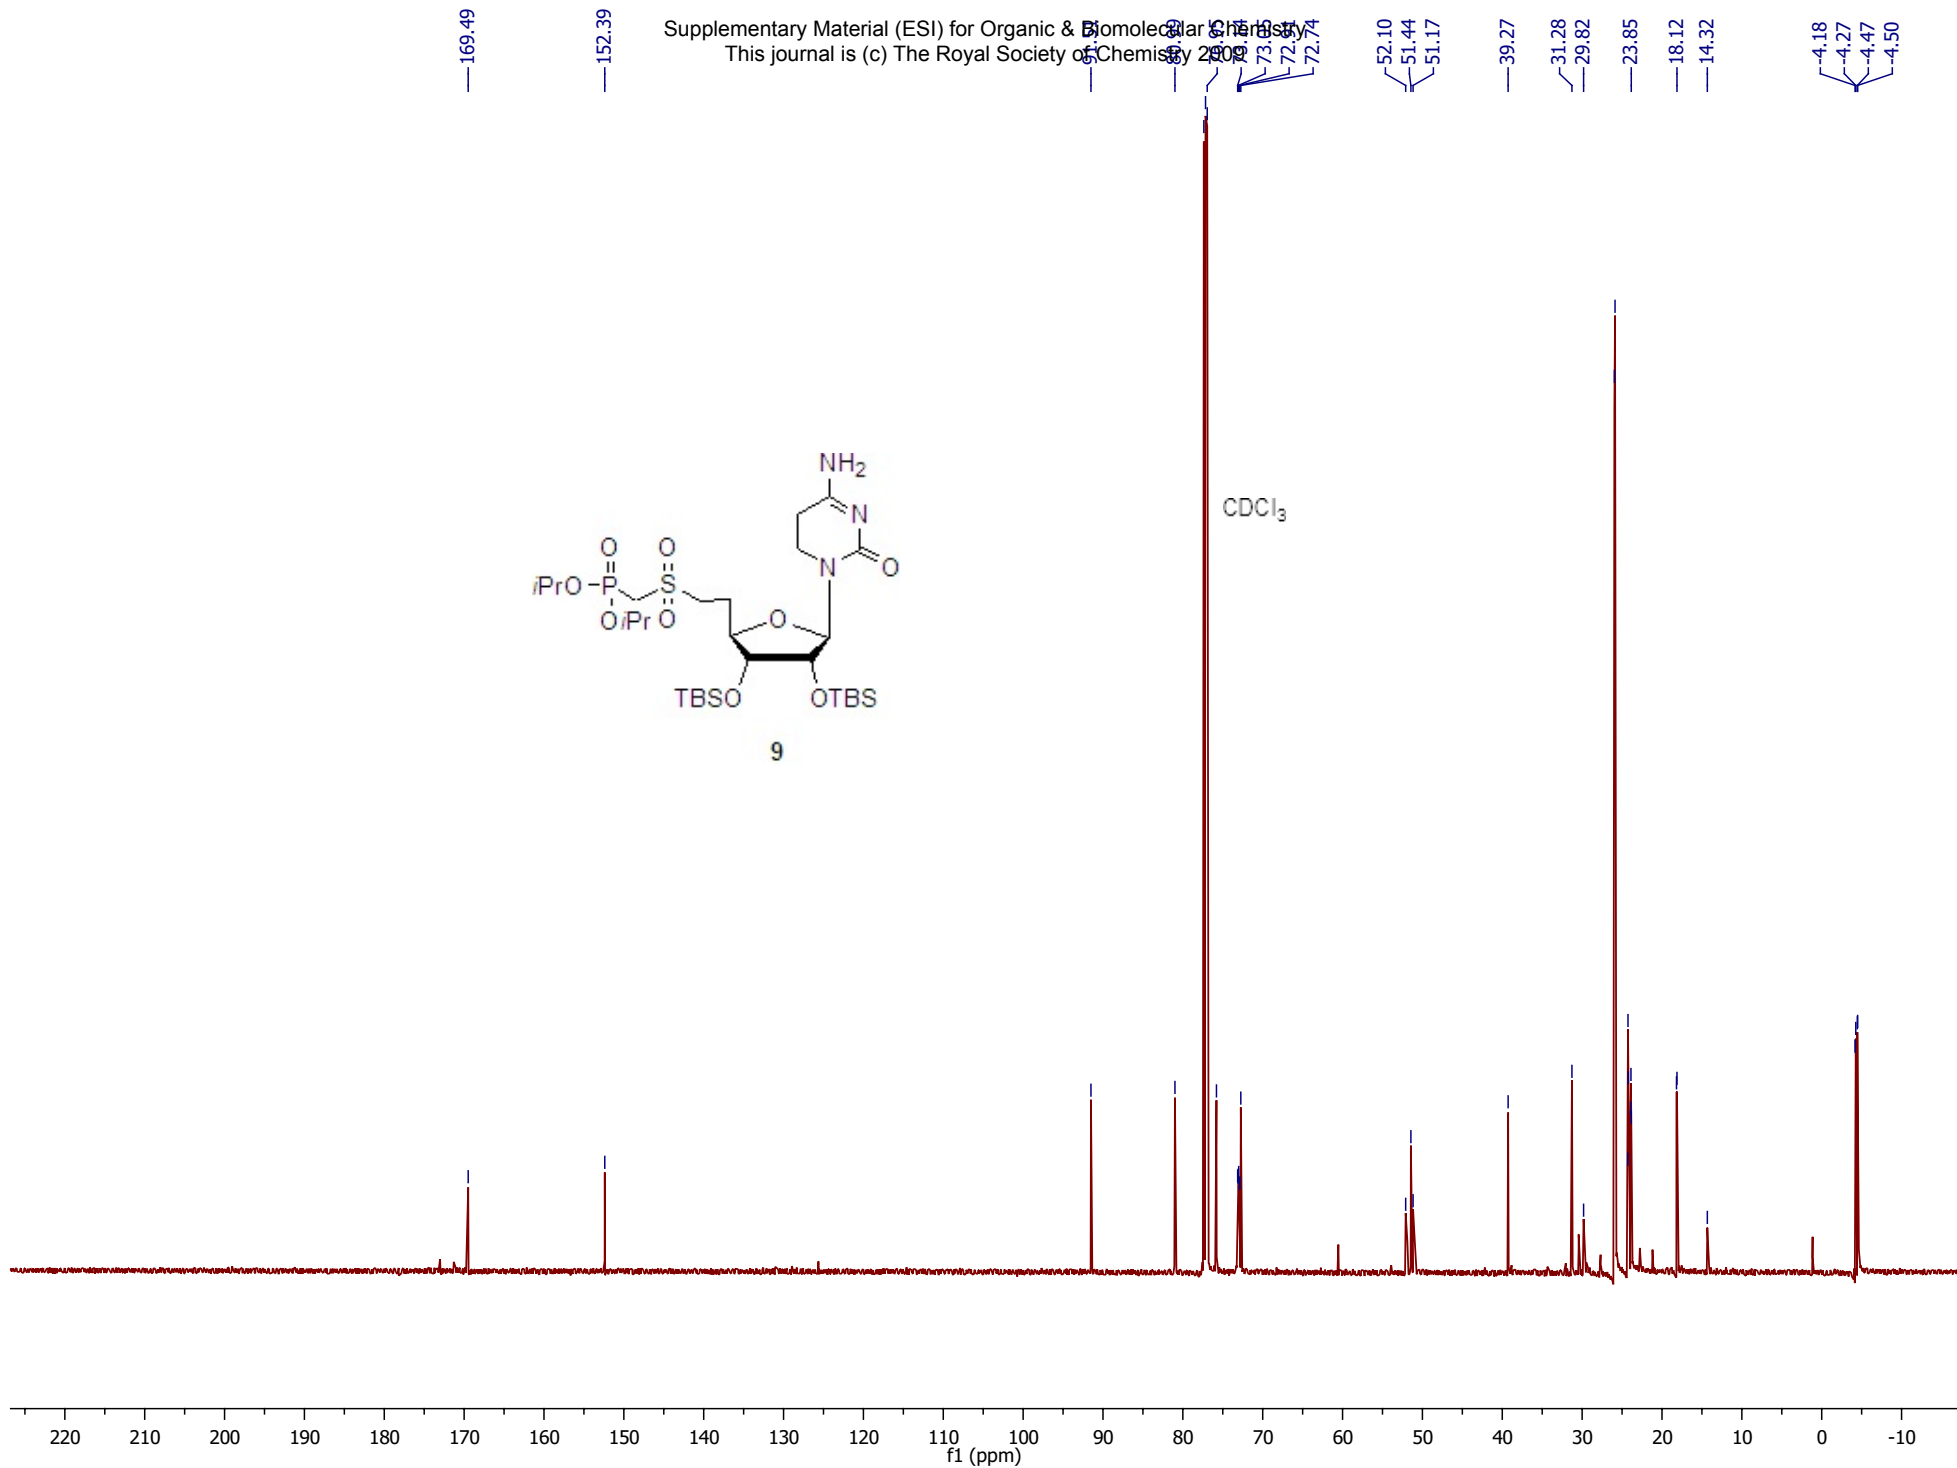

1063 #73-94 RT: 1.09-1.41 AV: 22 NL: 2.34E7

T: FTMS + c ESI Full ms [250.00-1000.00]

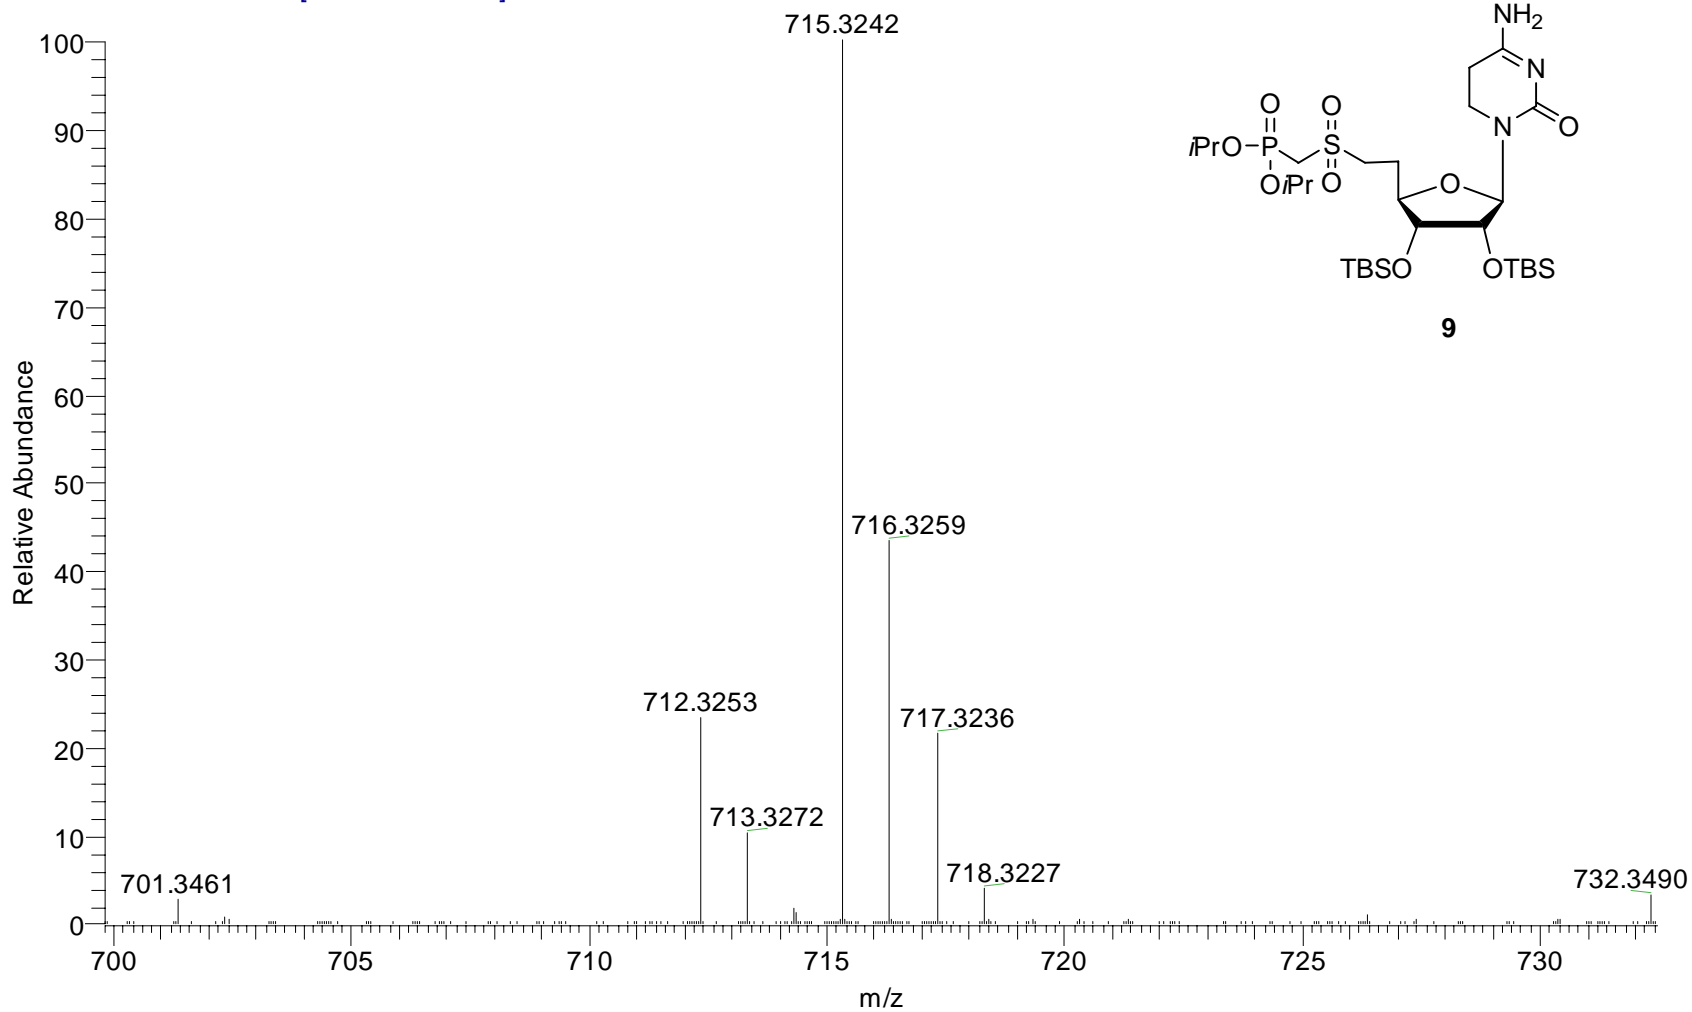



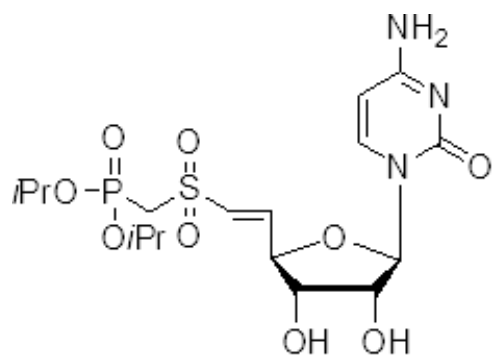

10

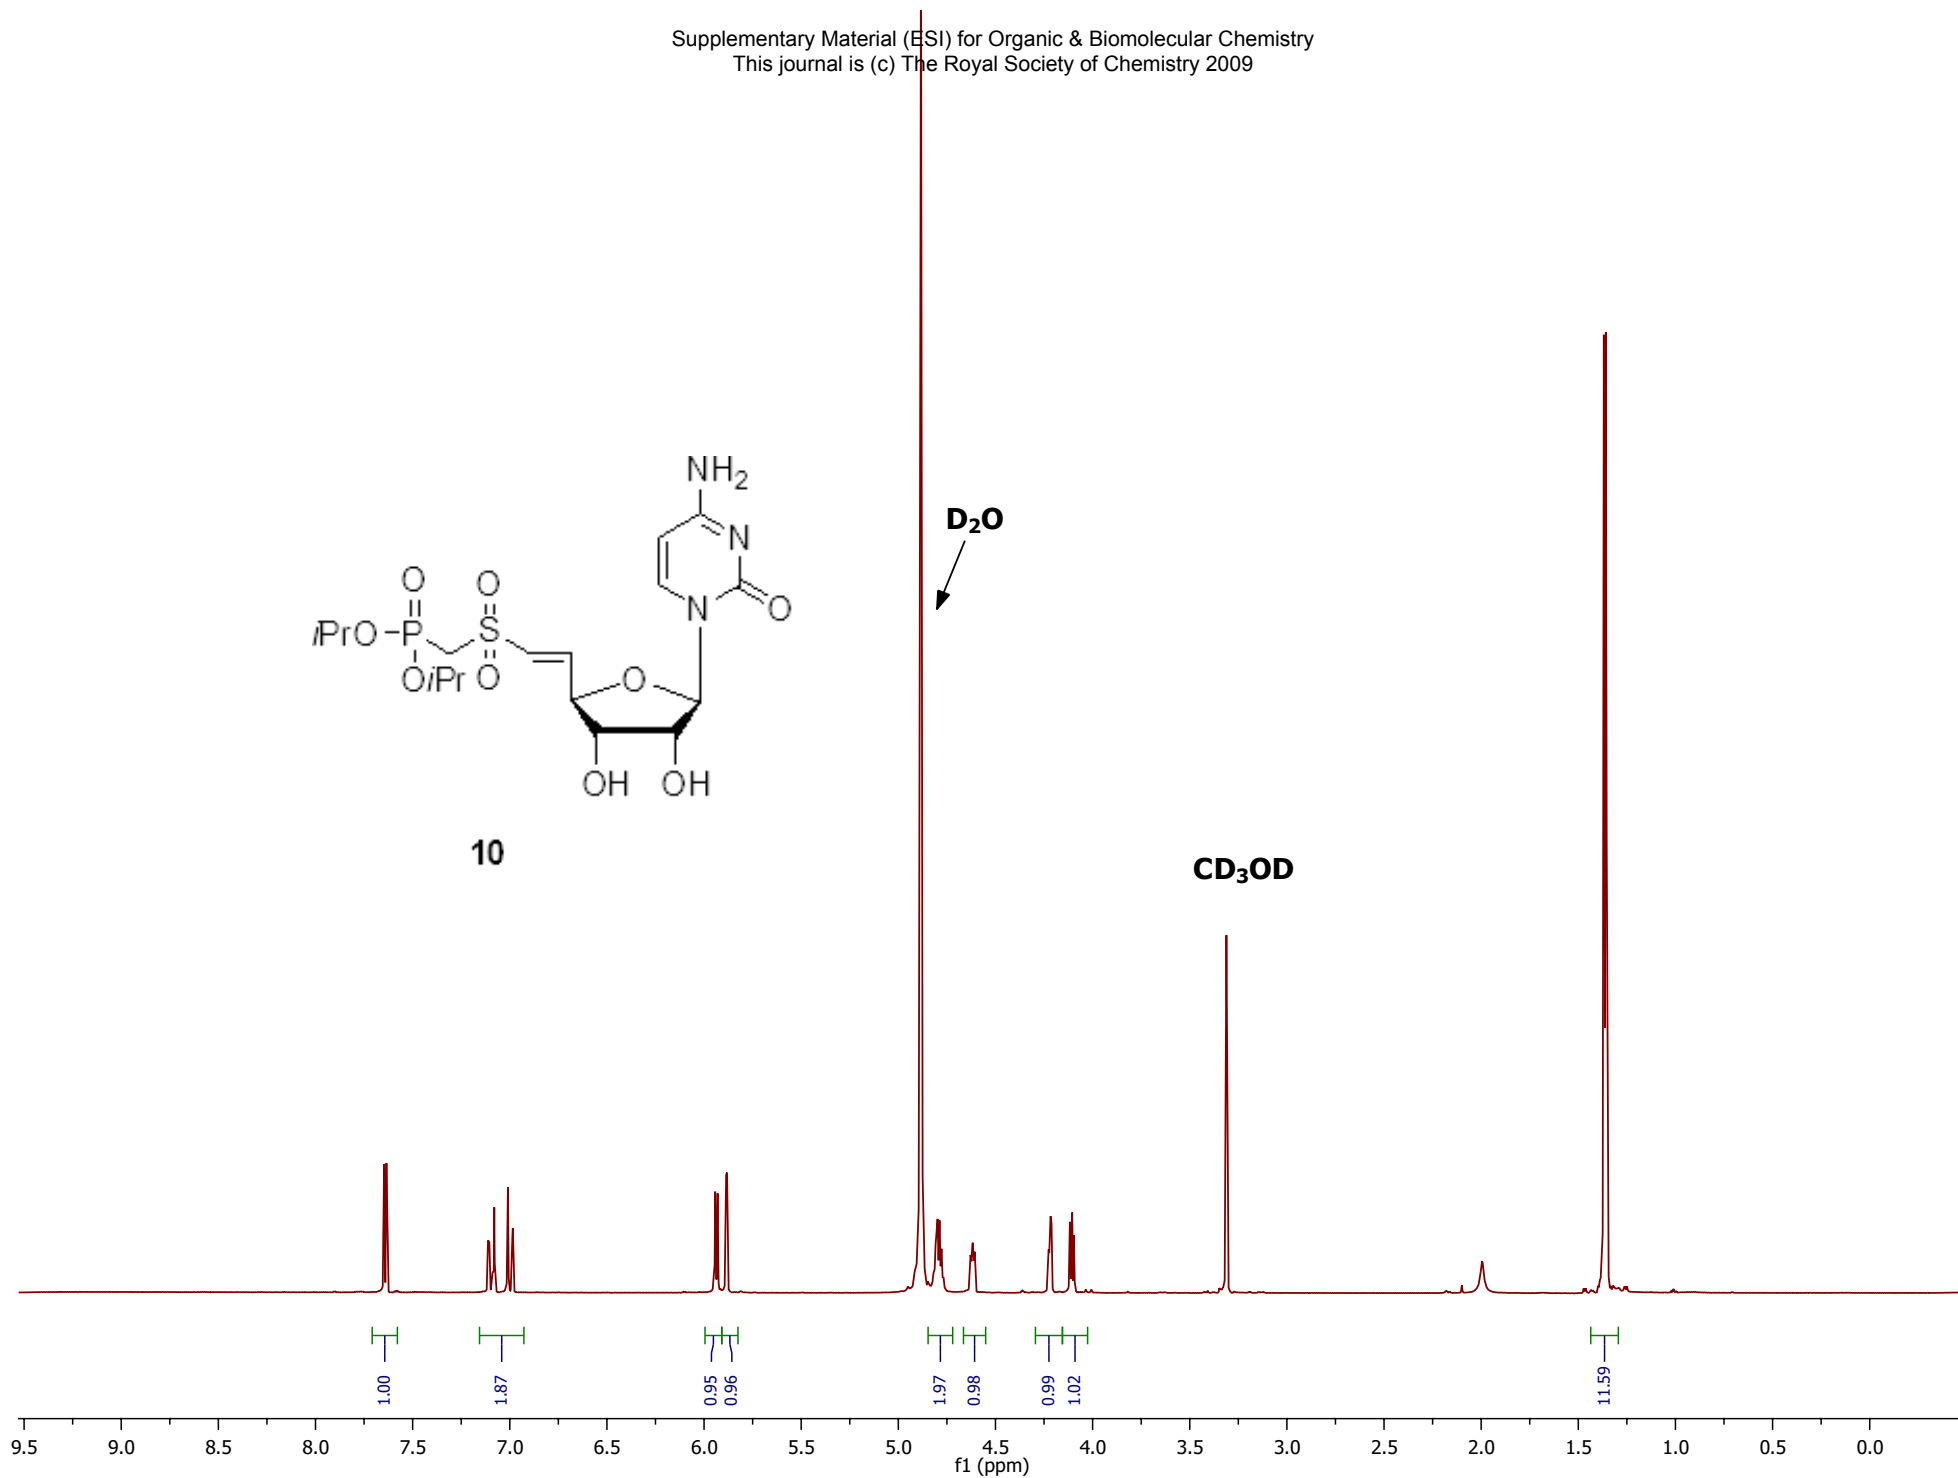

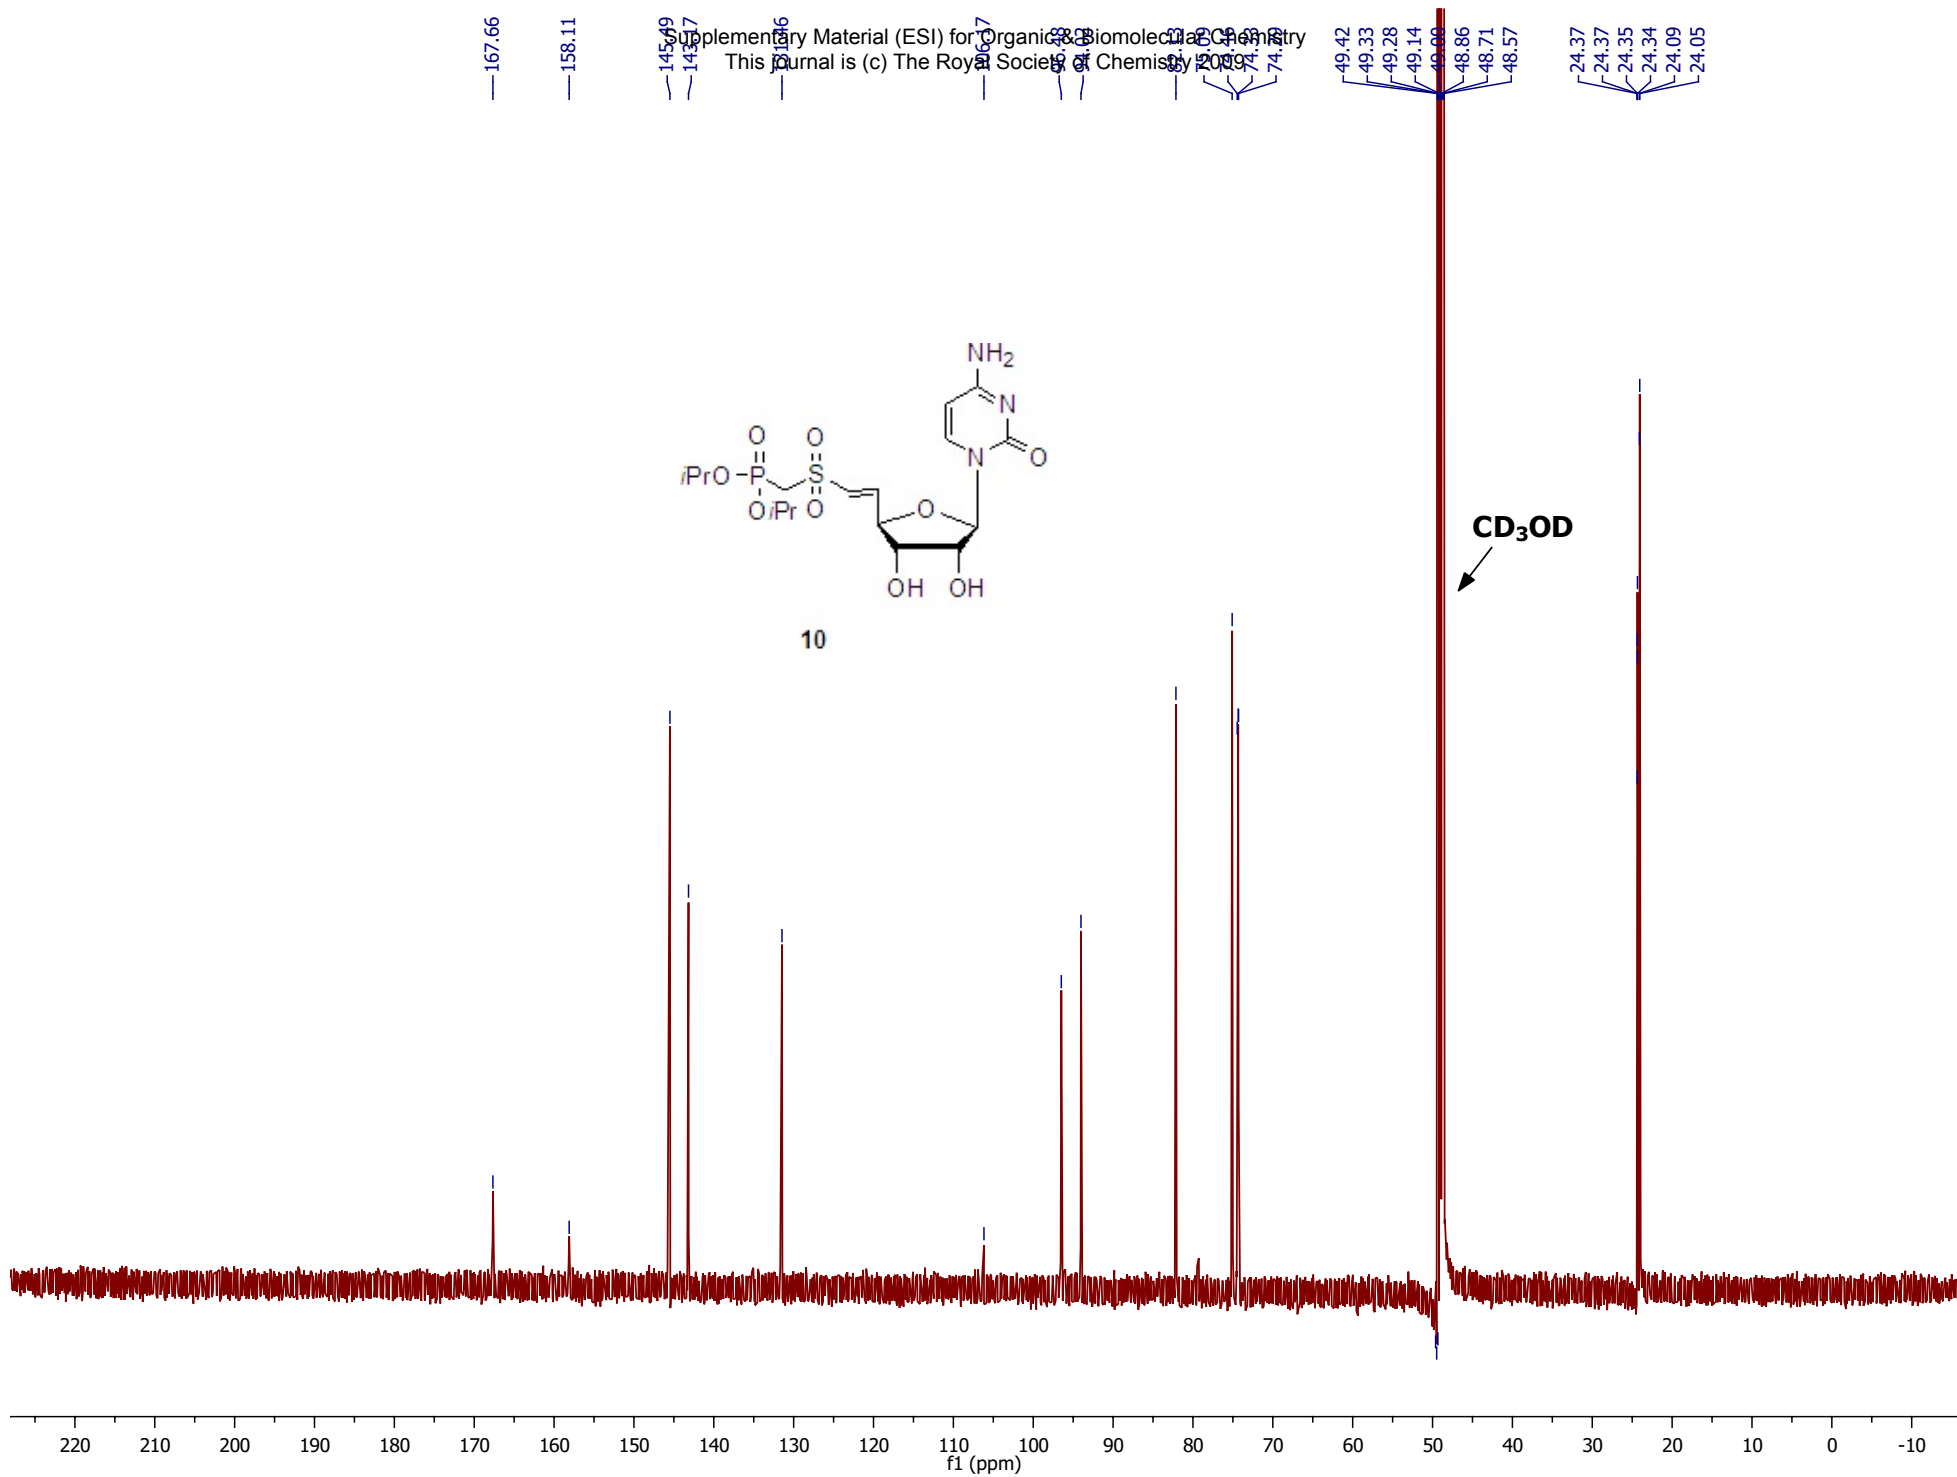

1027 #5-9 RT: 0.08-0.15 AV: 5 NL: 1.07E6  
T: FTMS + c ESI Full ms [200.00-1000.00]

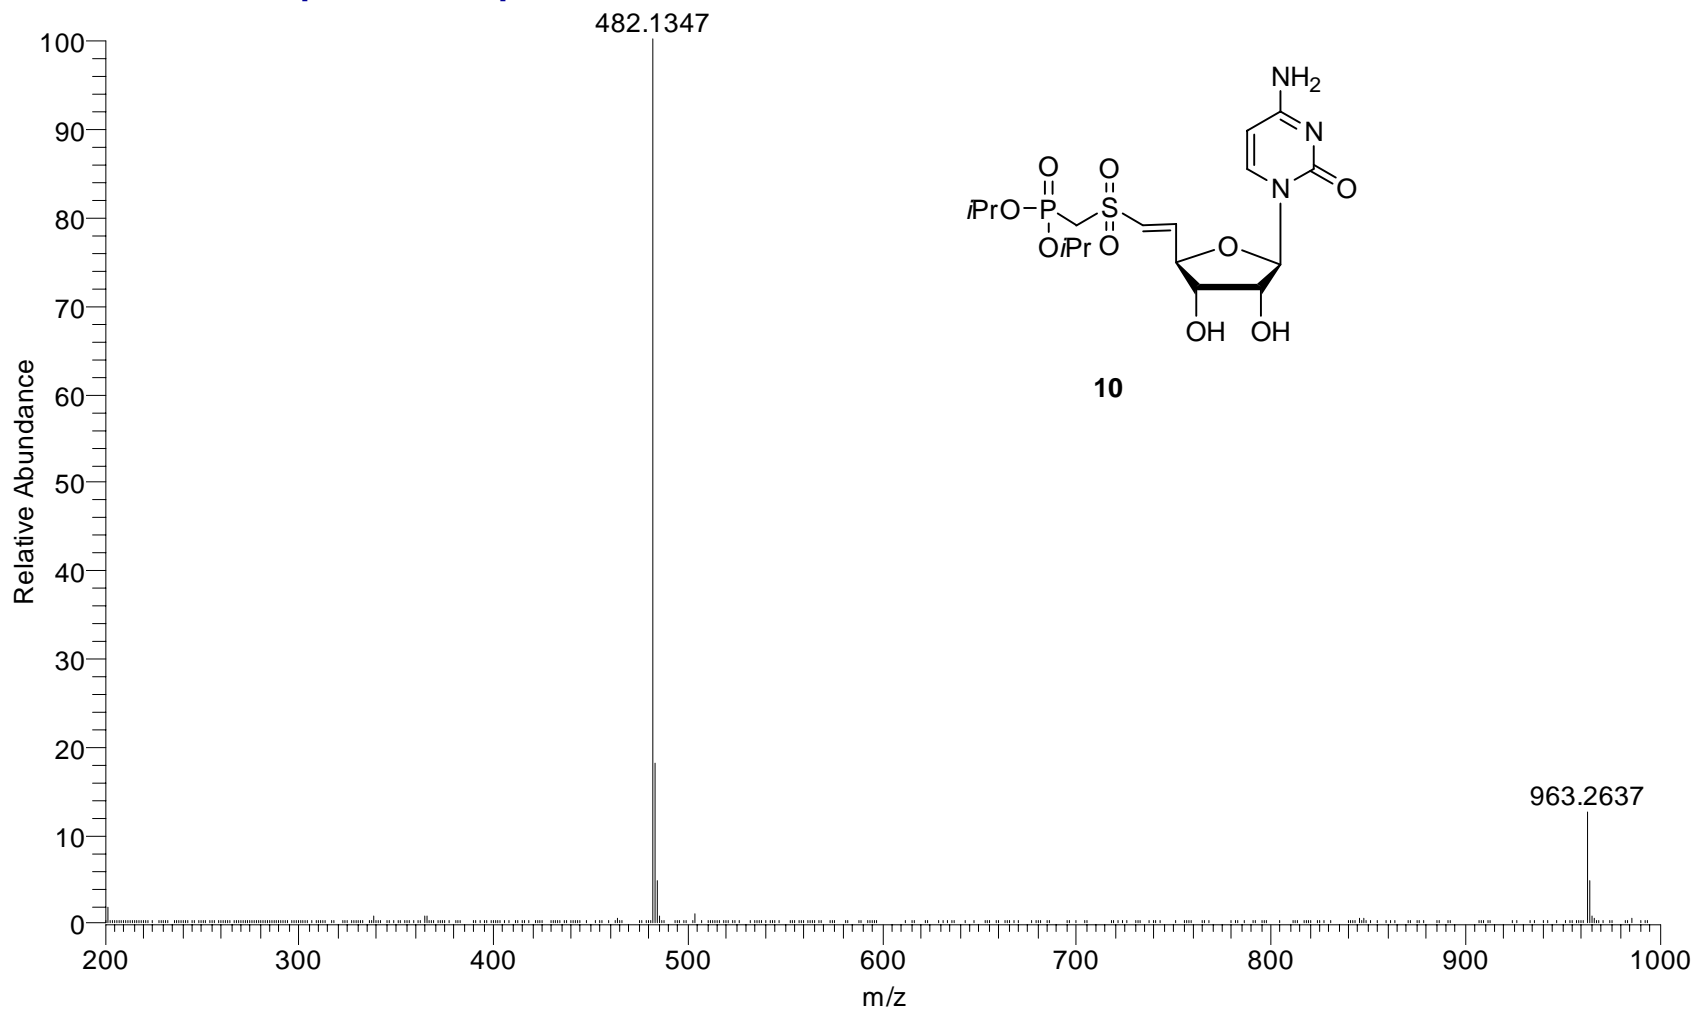

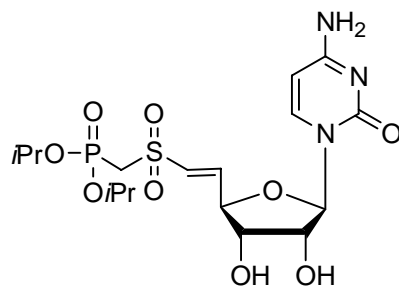

10

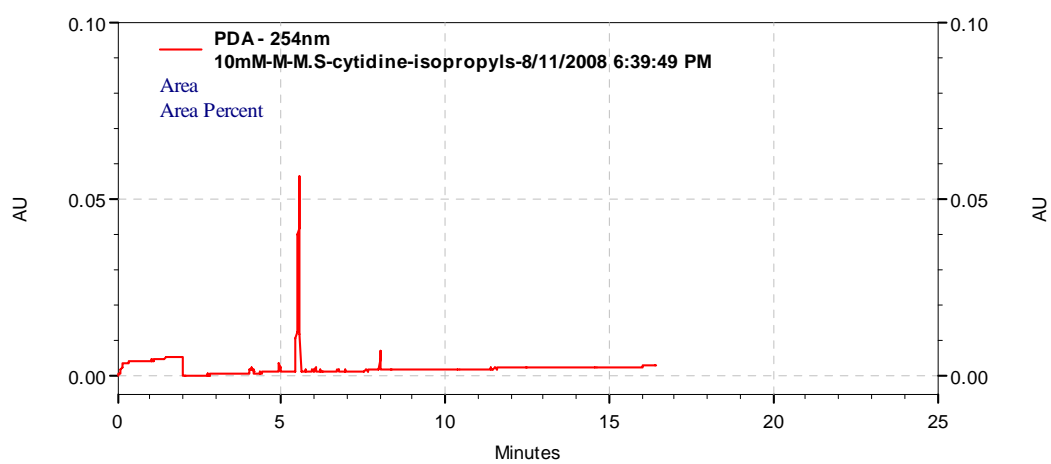

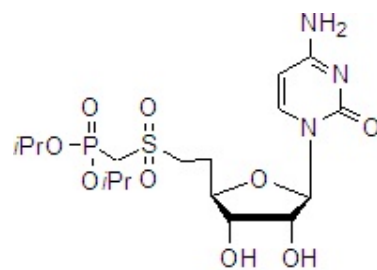

11

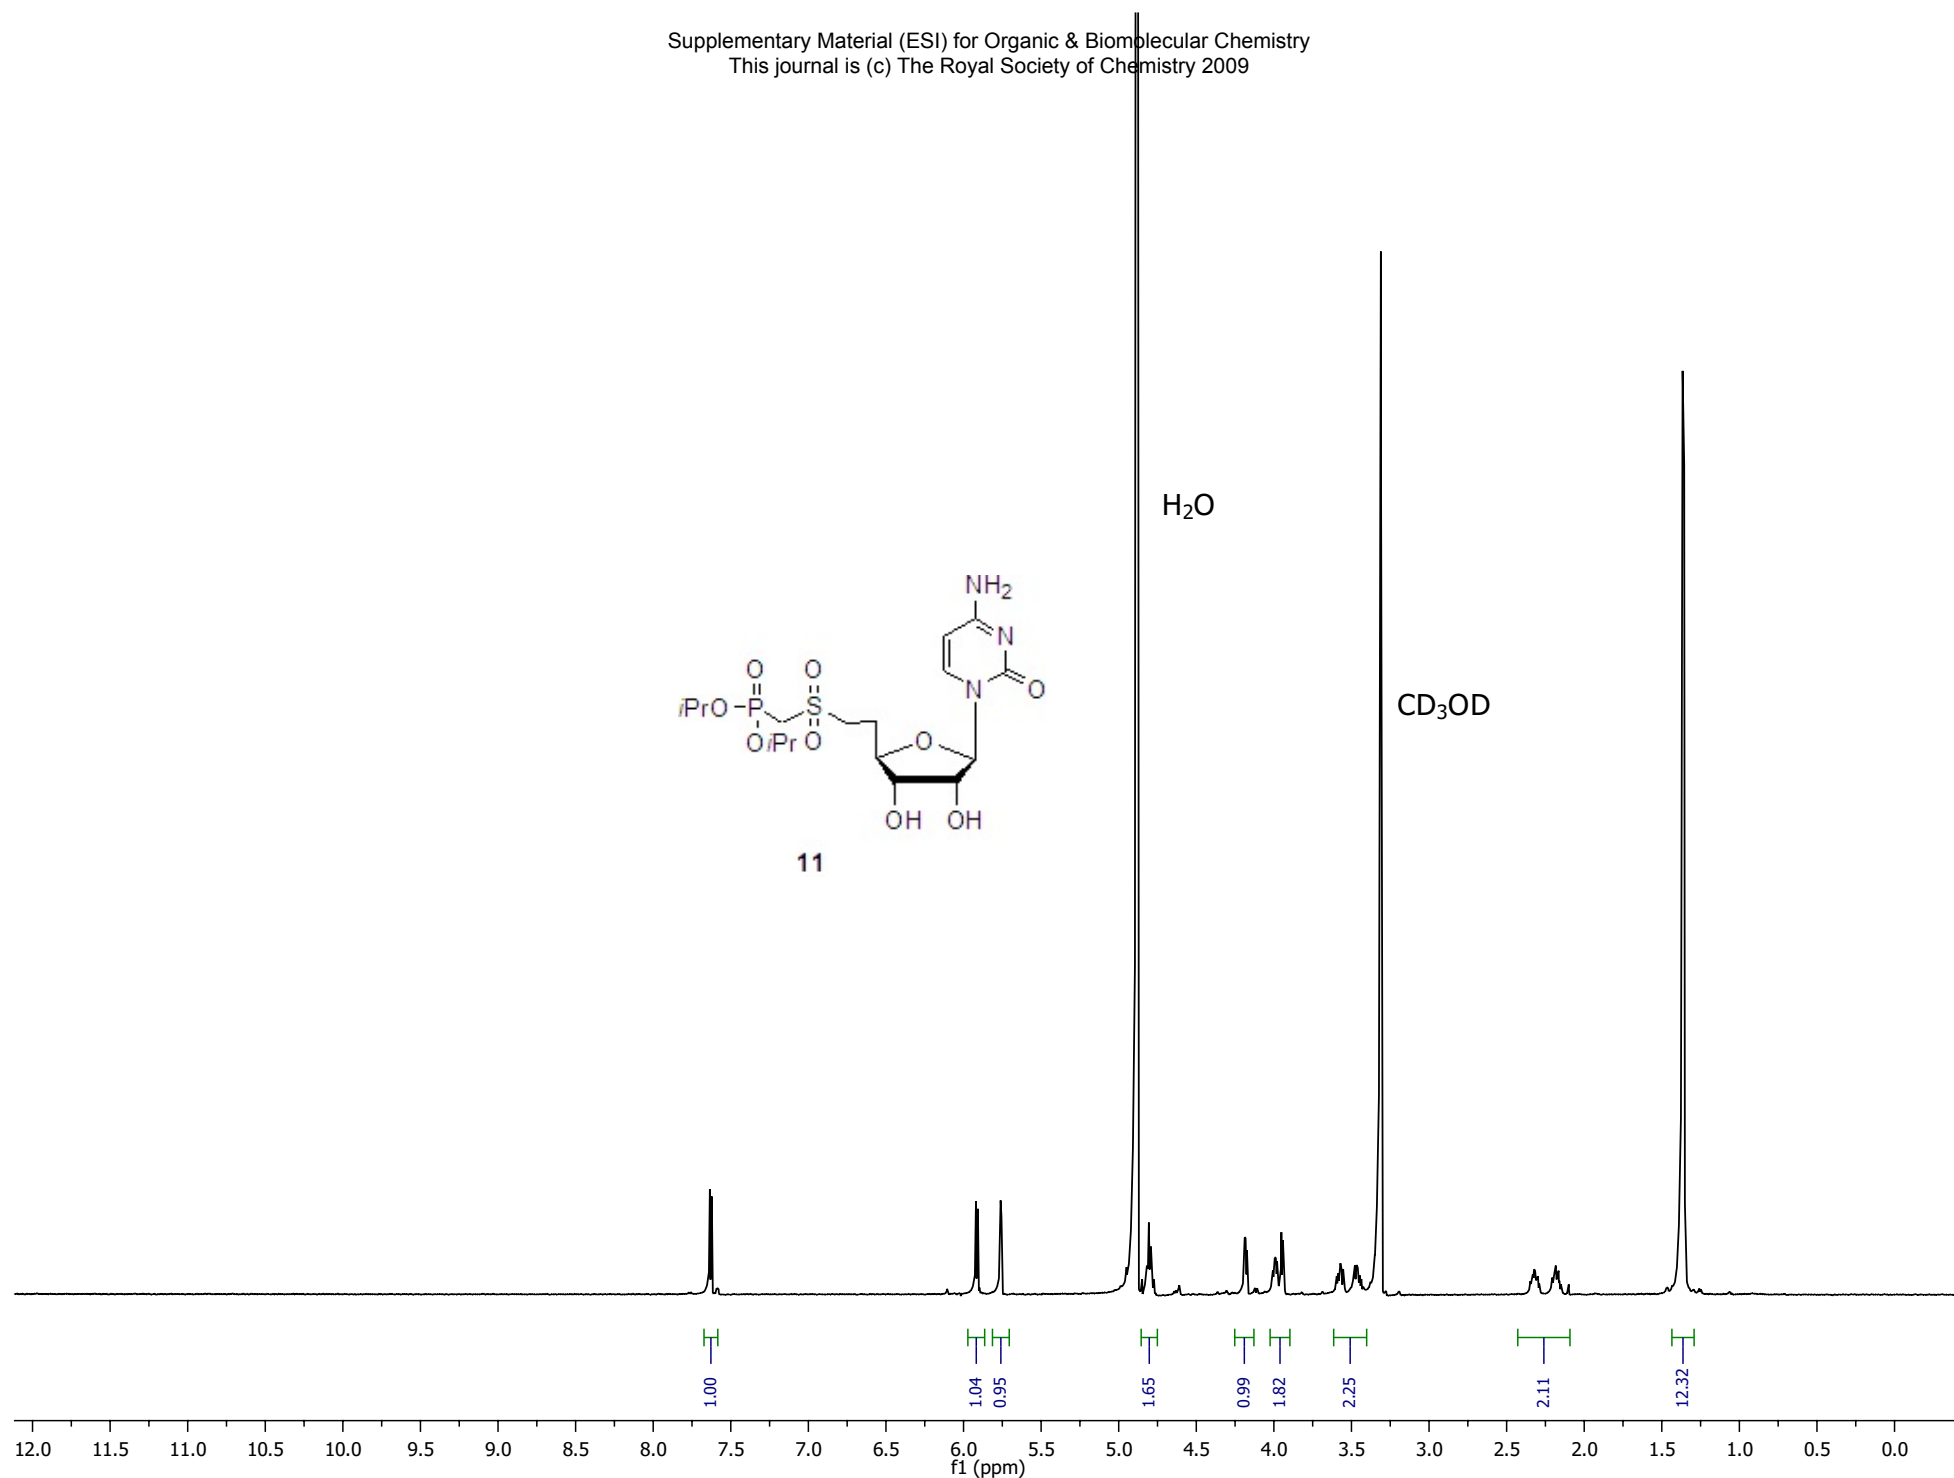

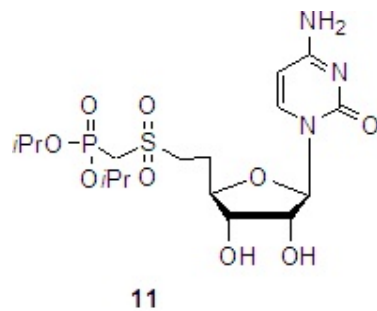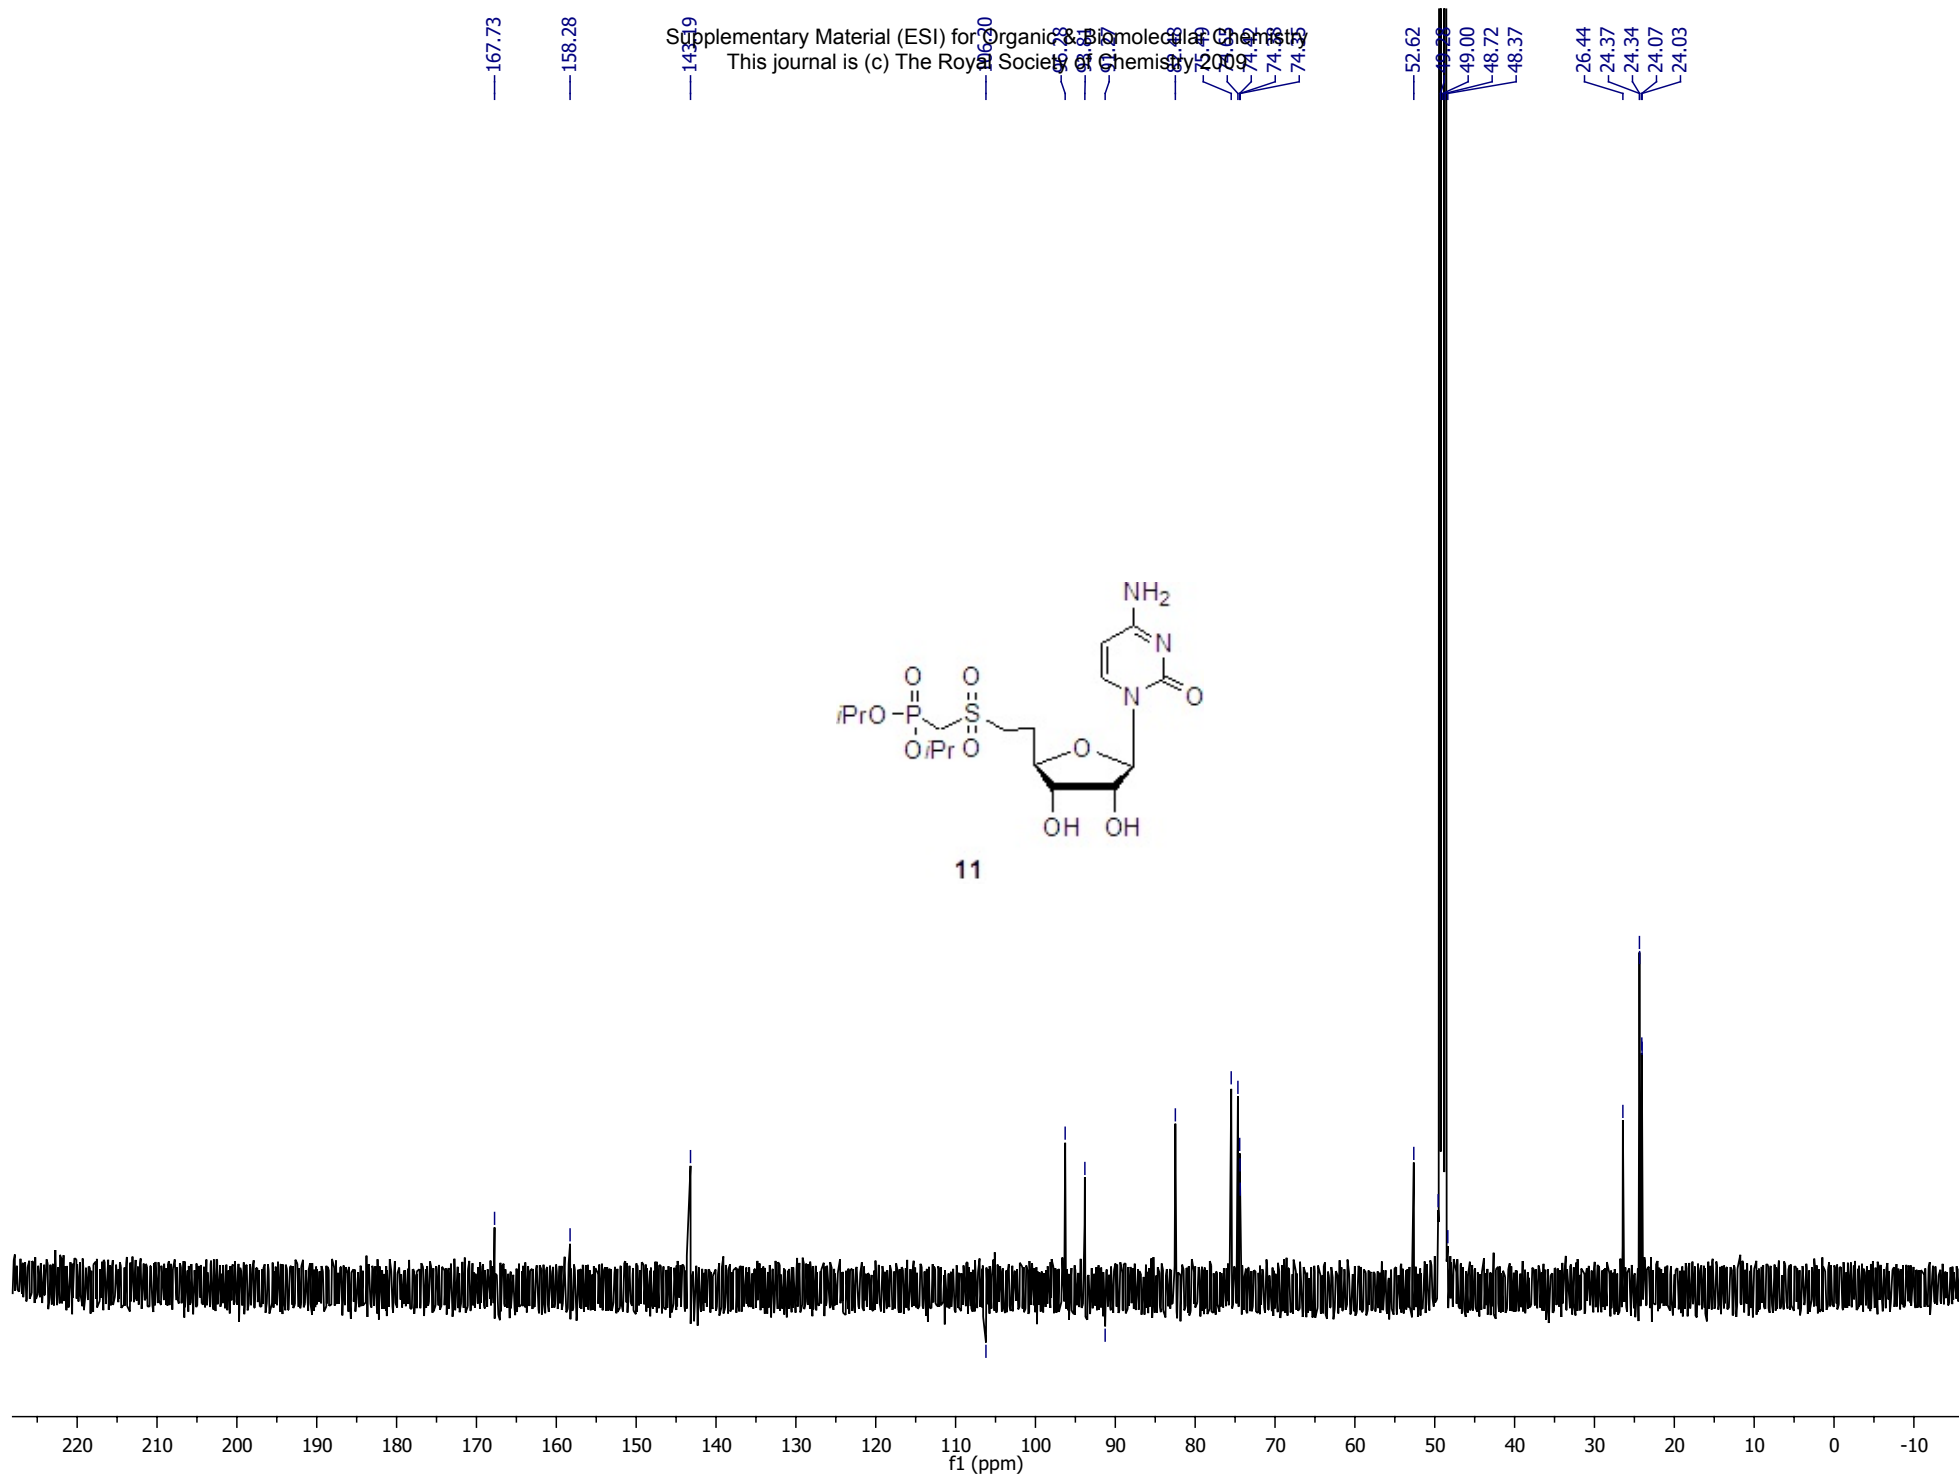

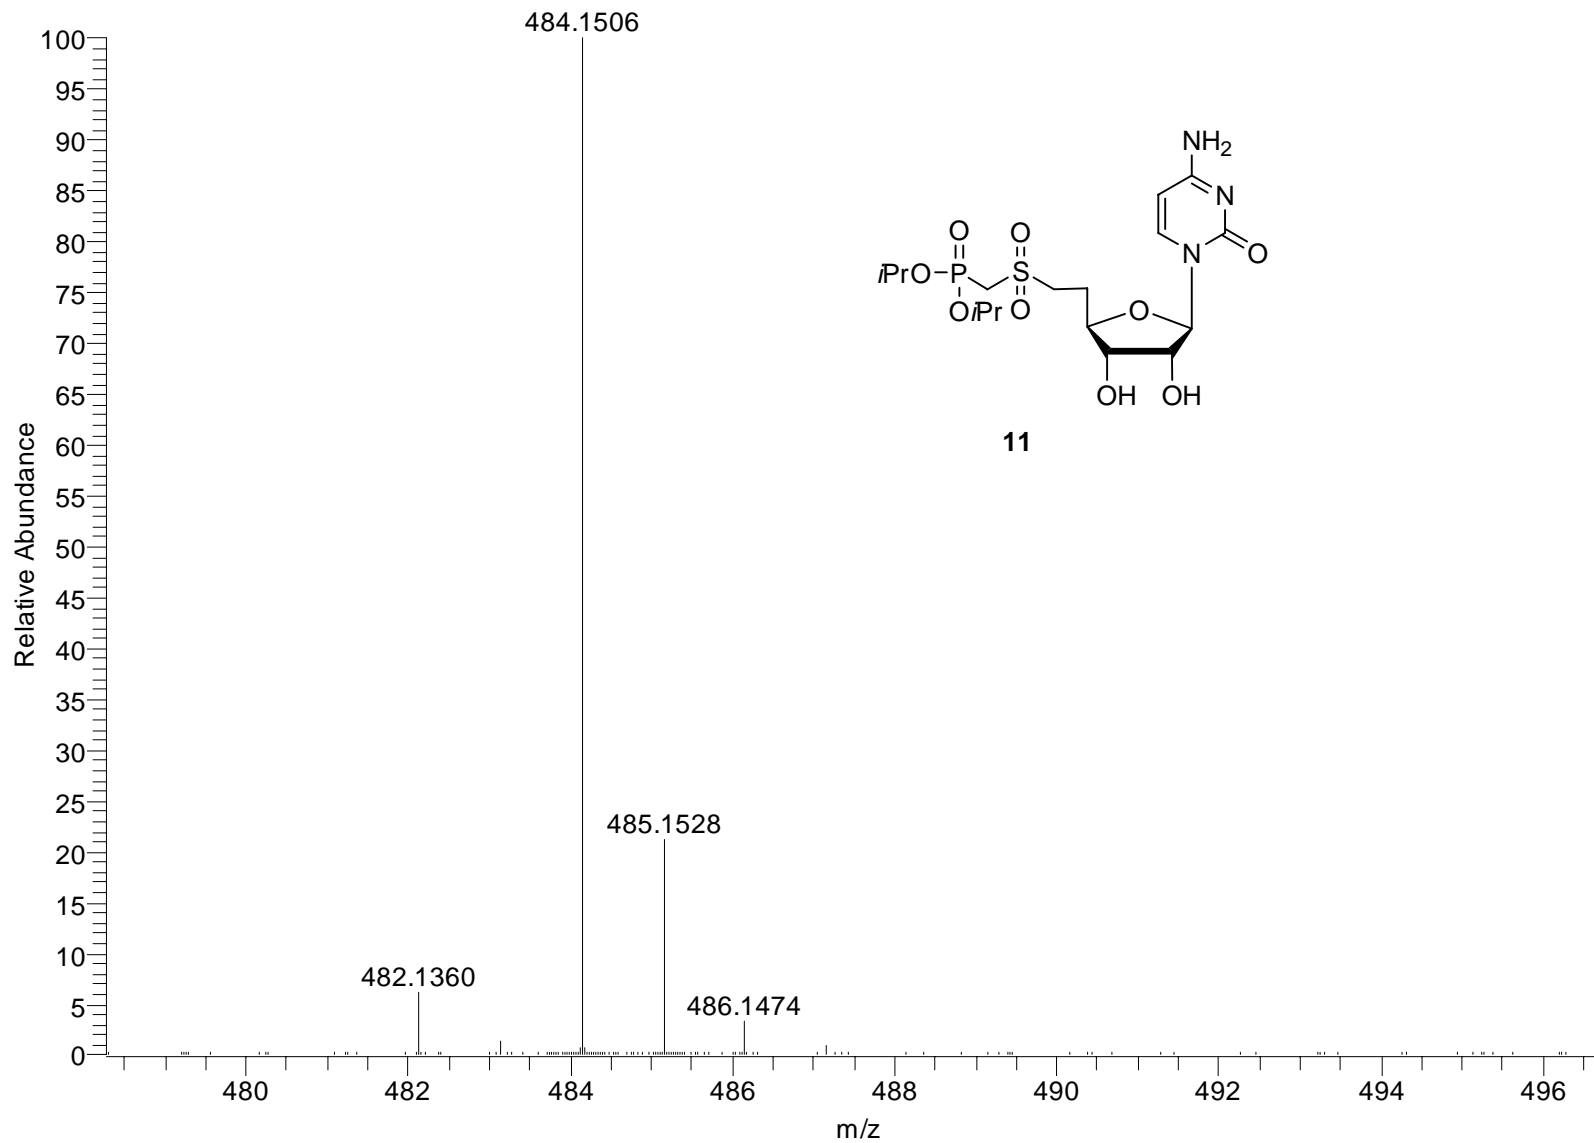

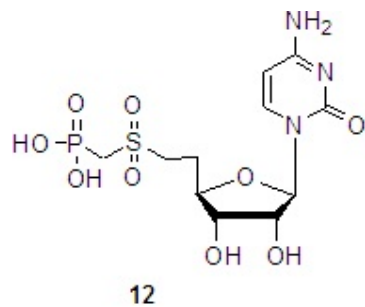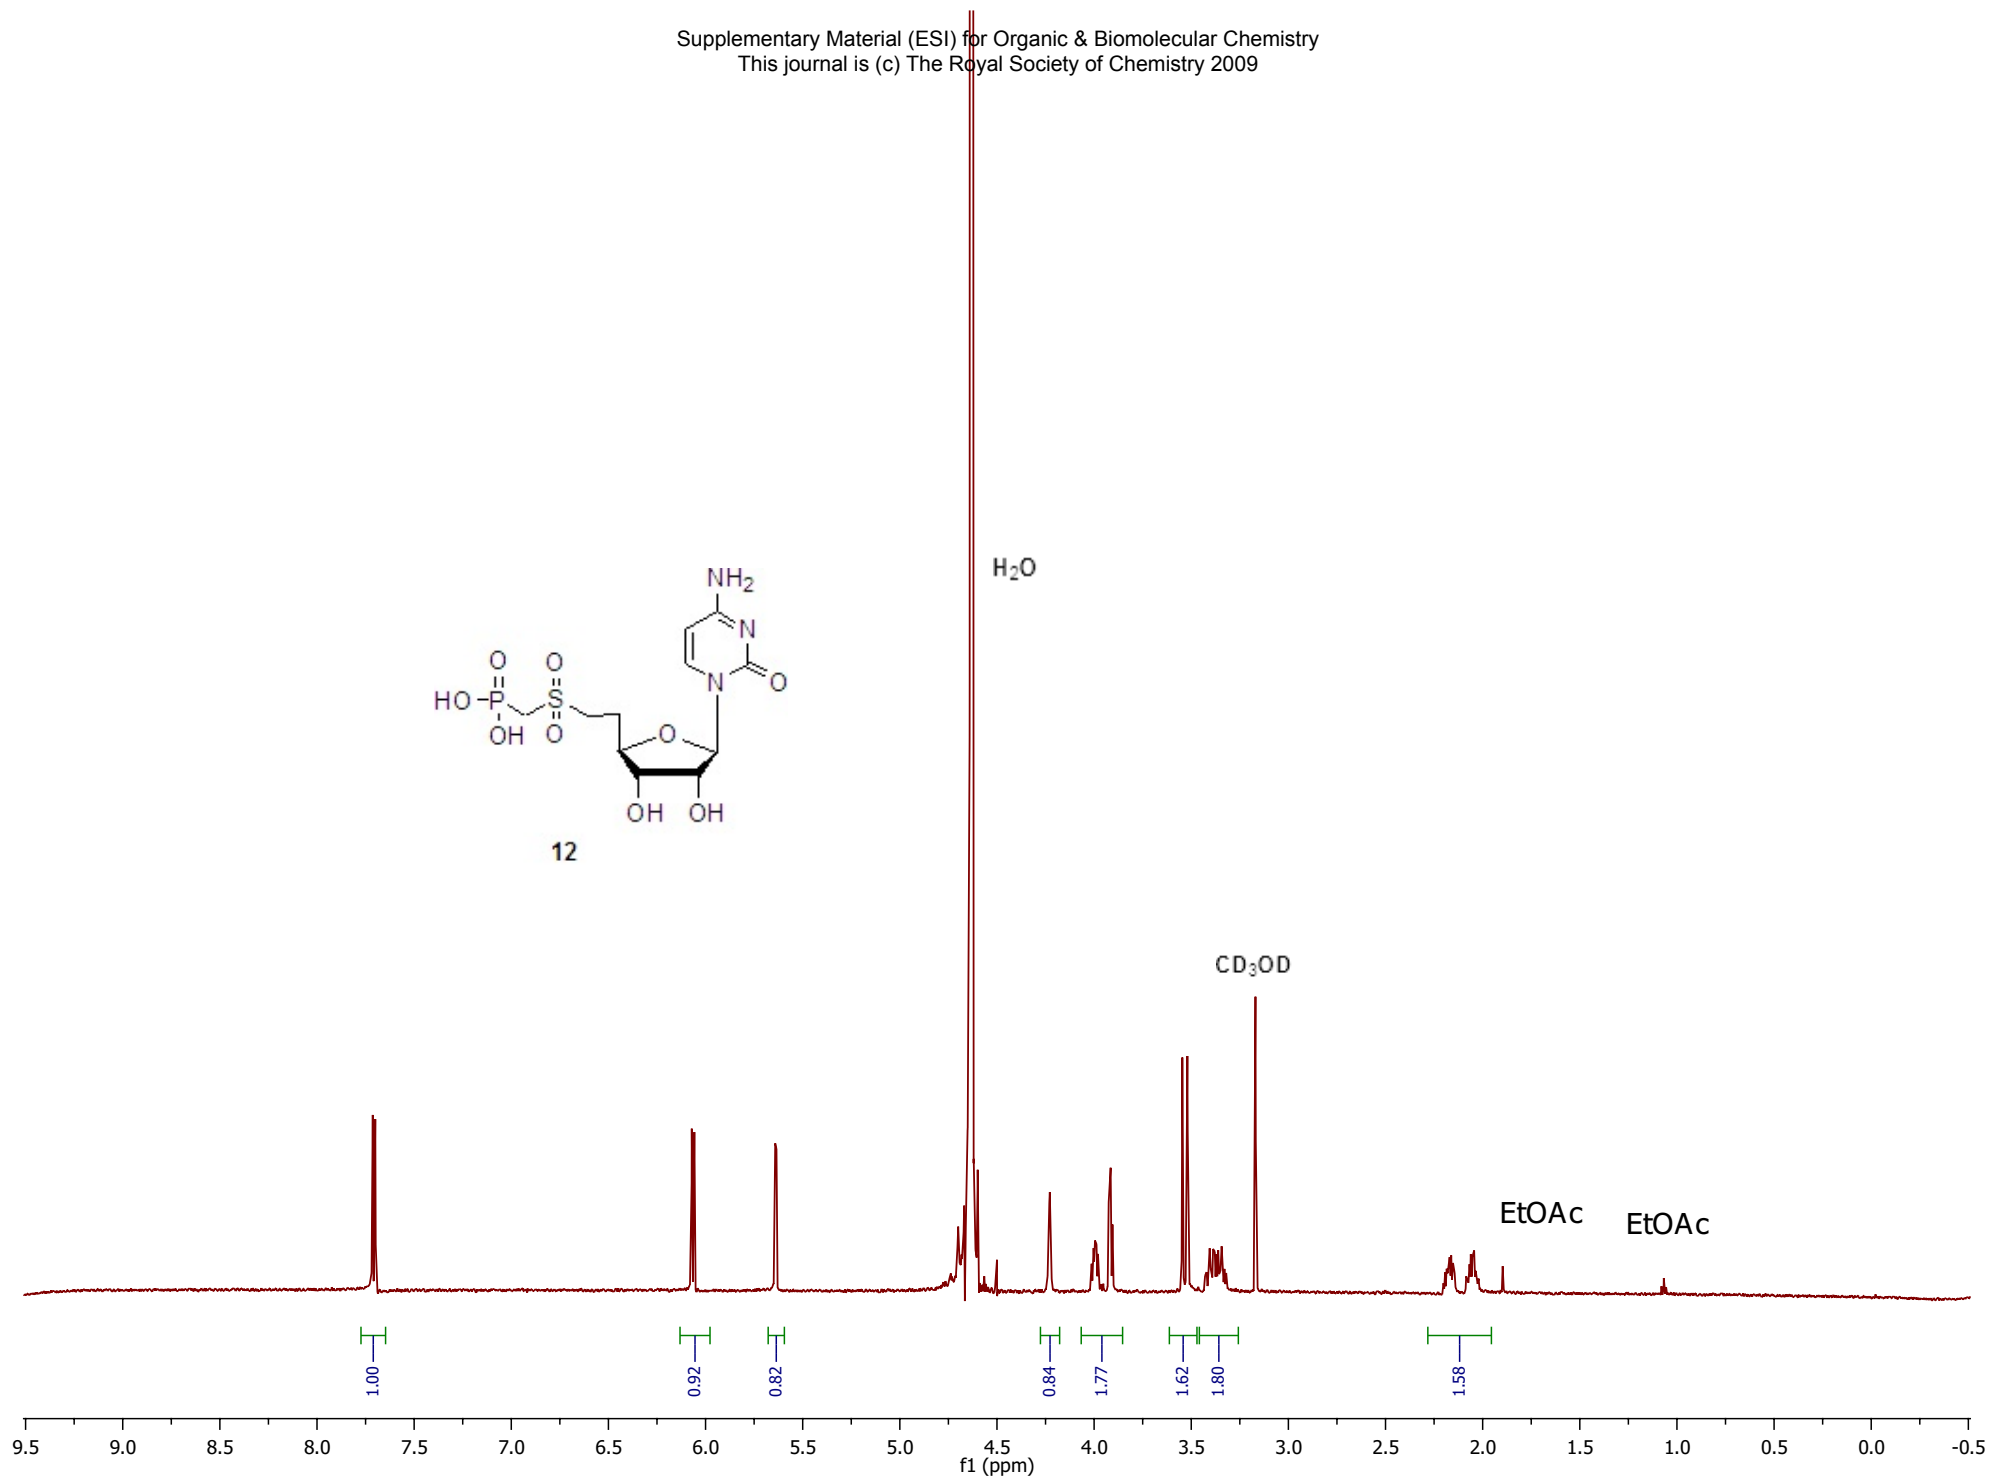



—159.47

—148.57

—144.63

—84.91

—81.11

—81.11

—76.11

—76.11

—51.77

—50.96

—50.48

—25.11

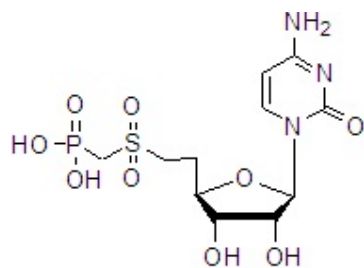

12

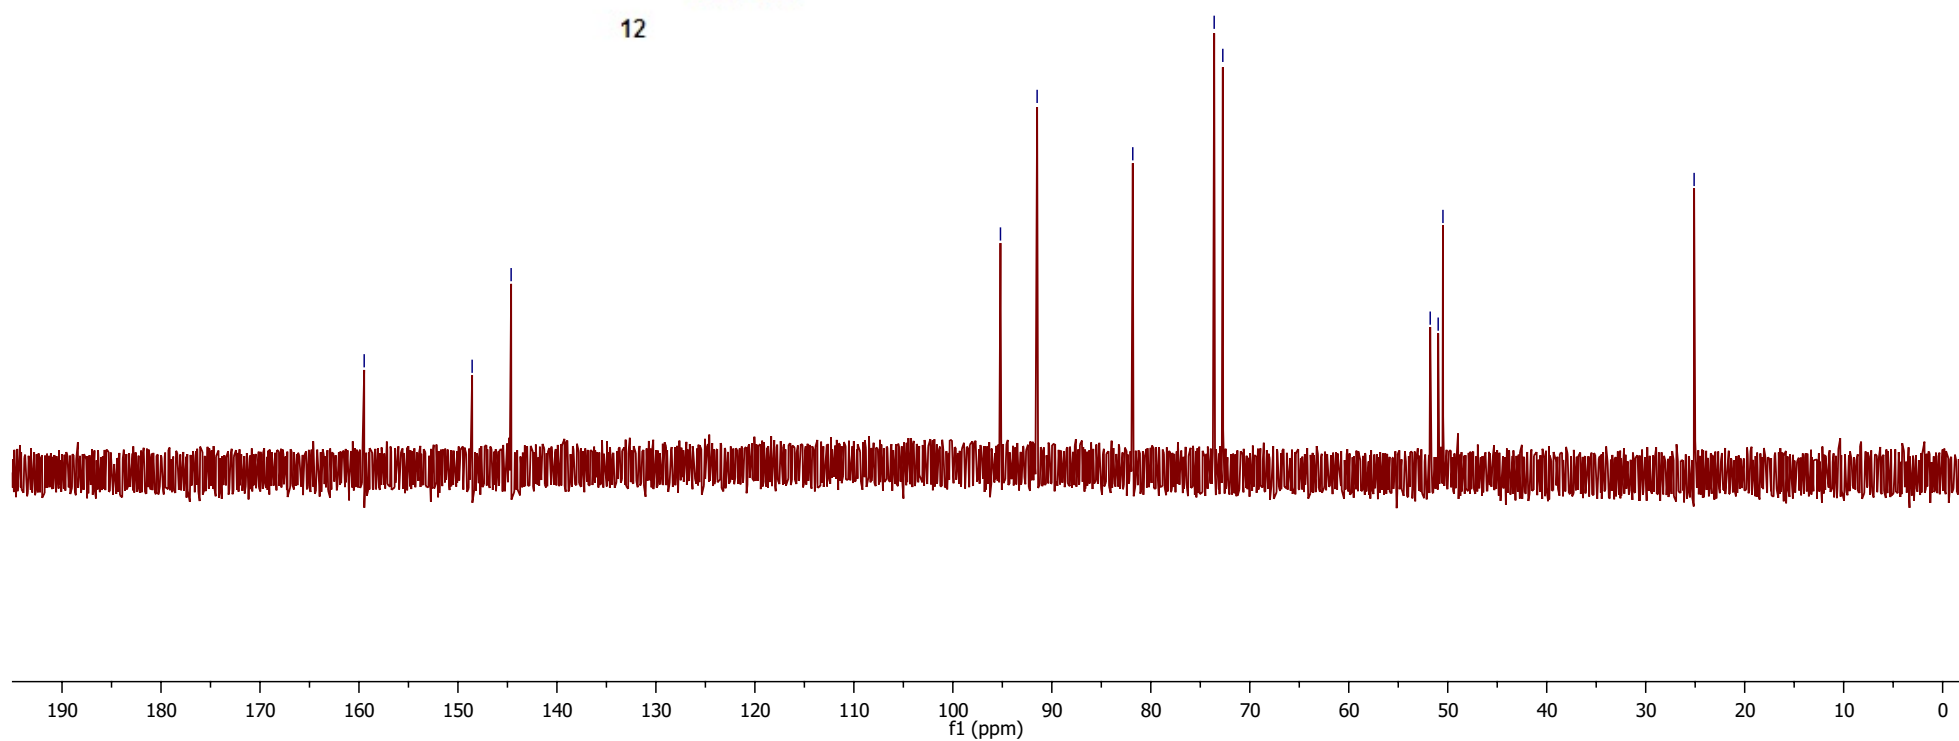

1021-2 #217-267 RT: 3.65-4.49 AV: 51 NL: 1.44E7  
T: FTMS + c NSI Full ms [200.00-1000.00]

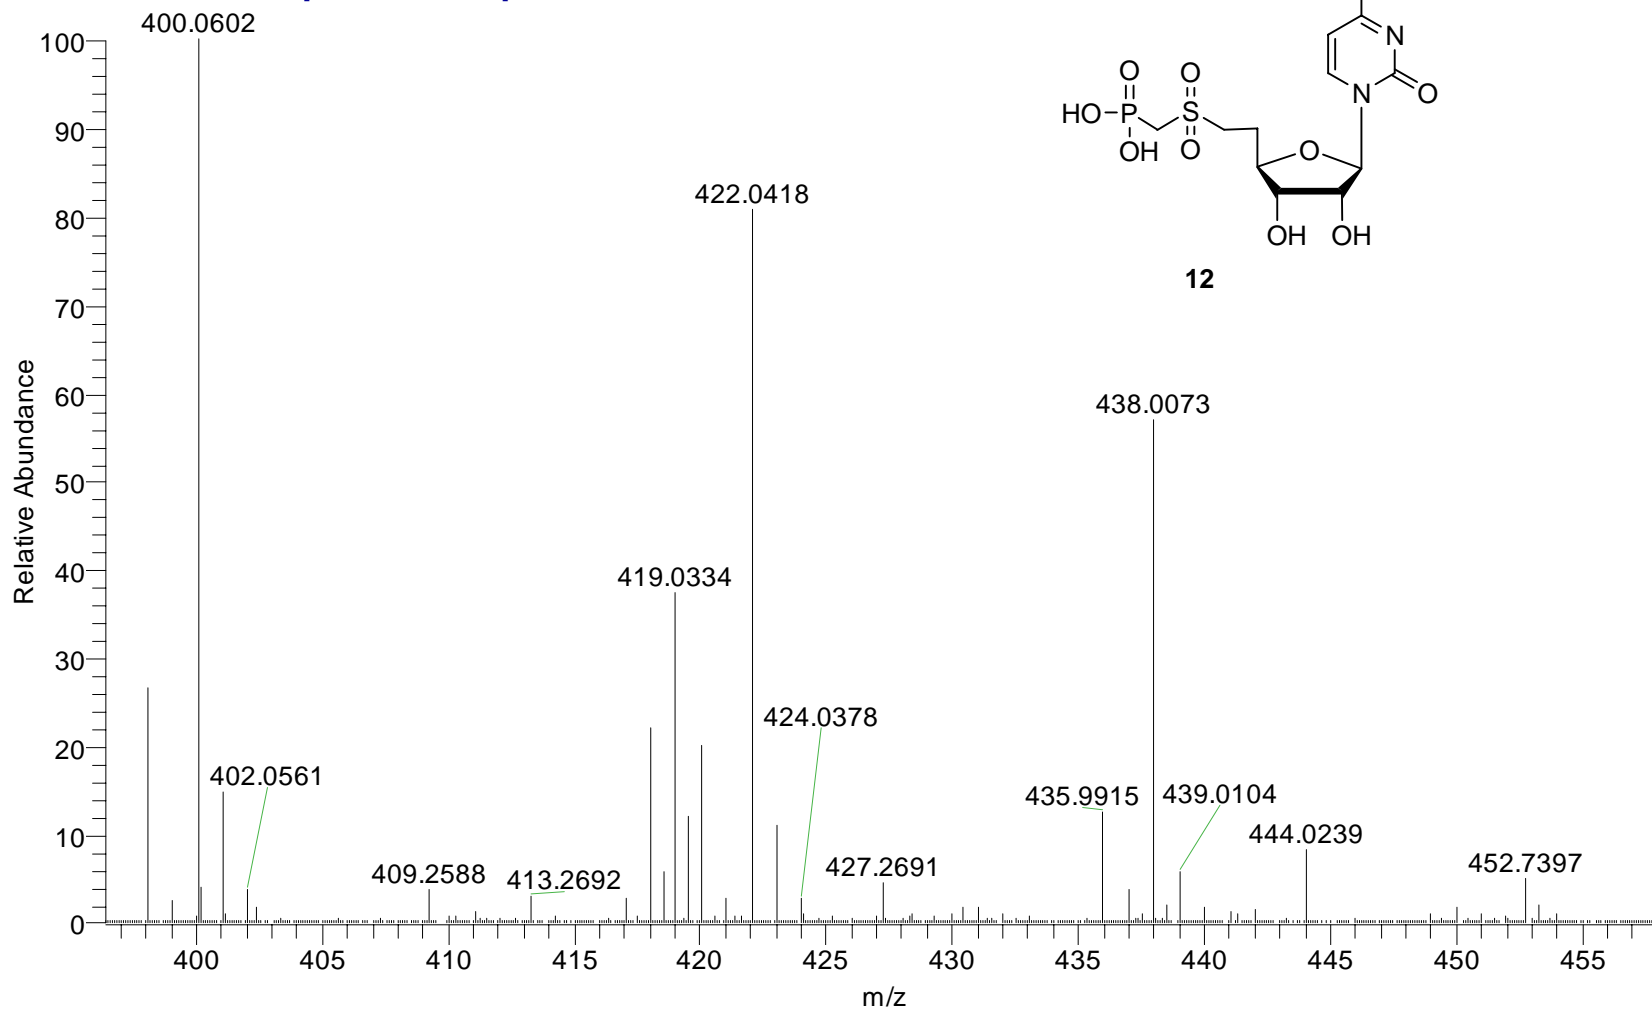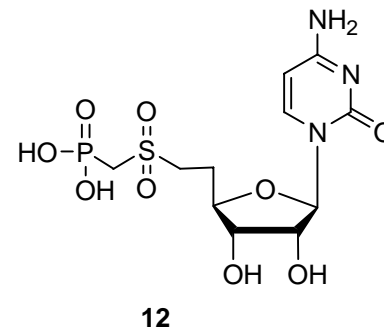

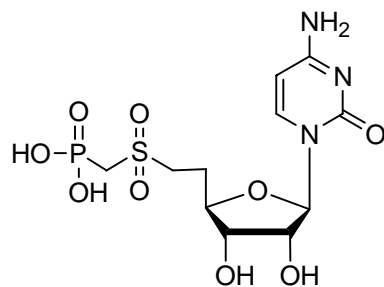

12

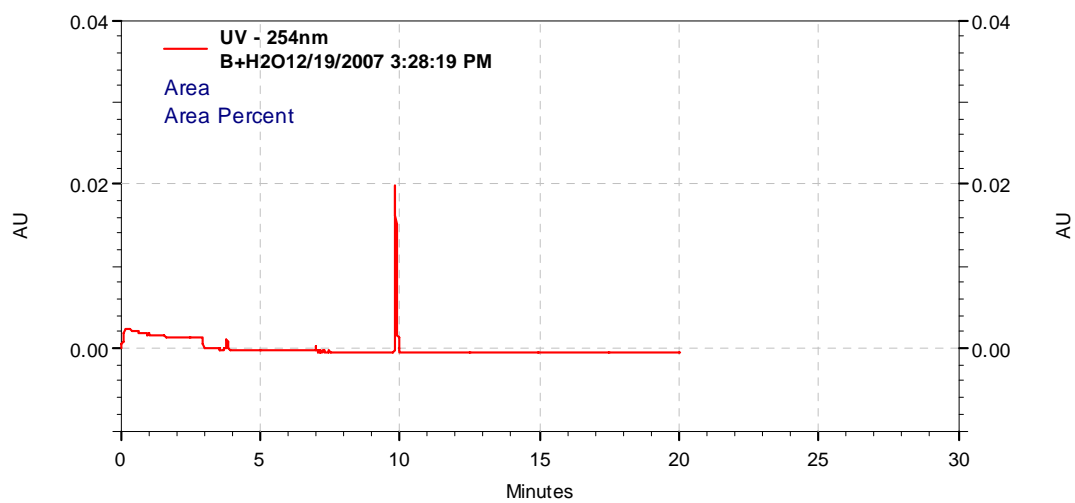

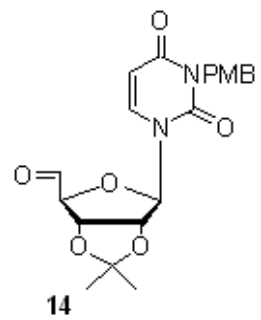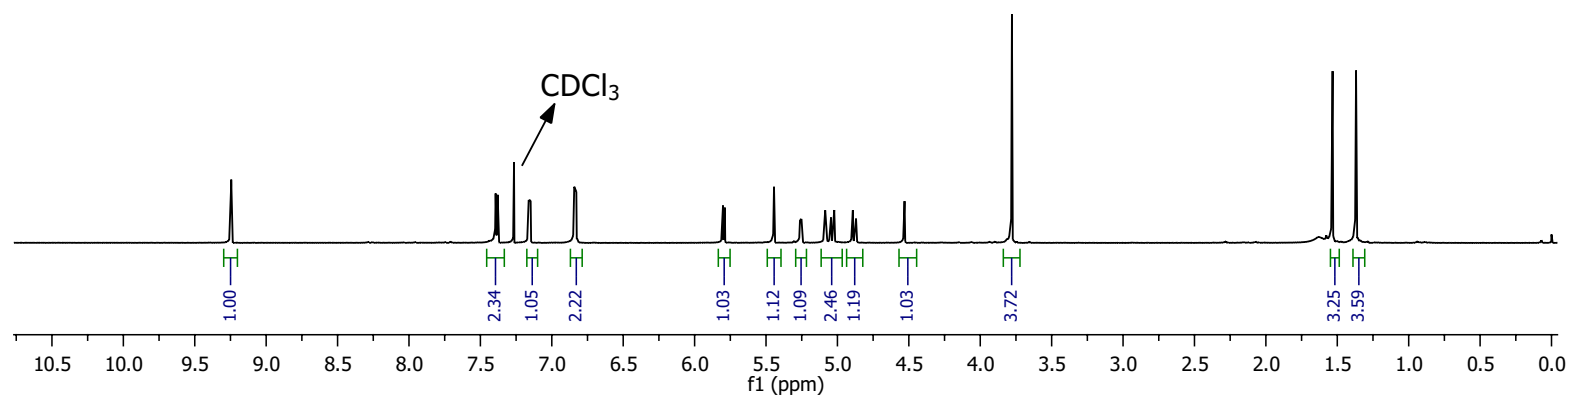

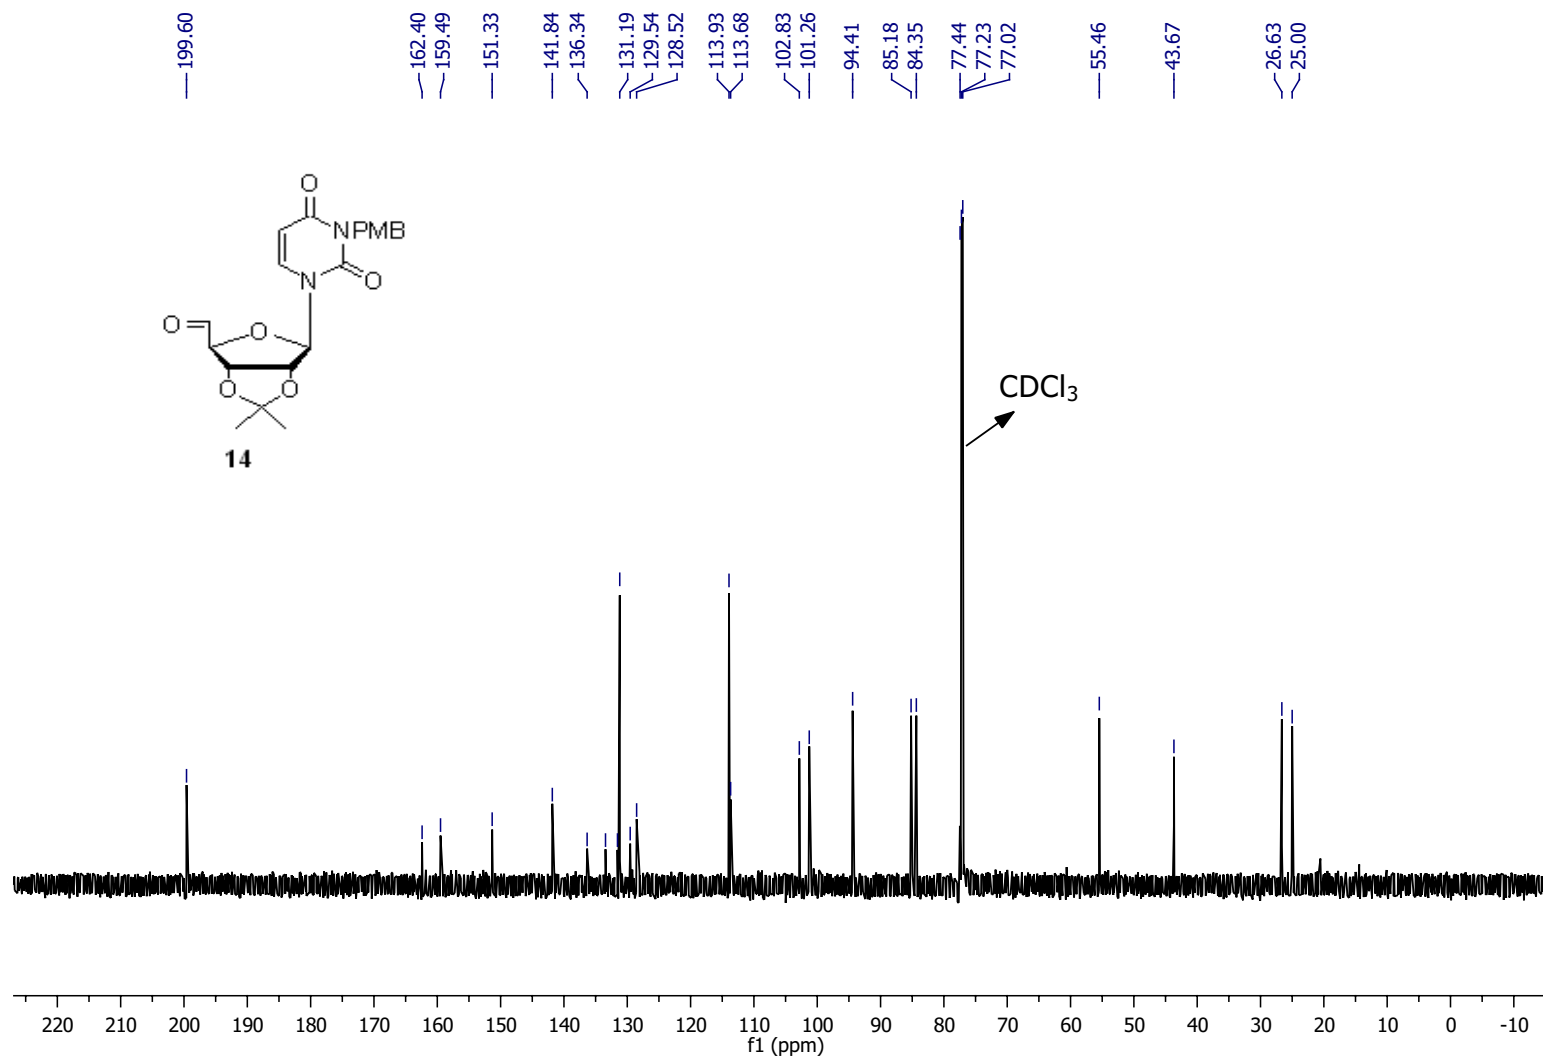

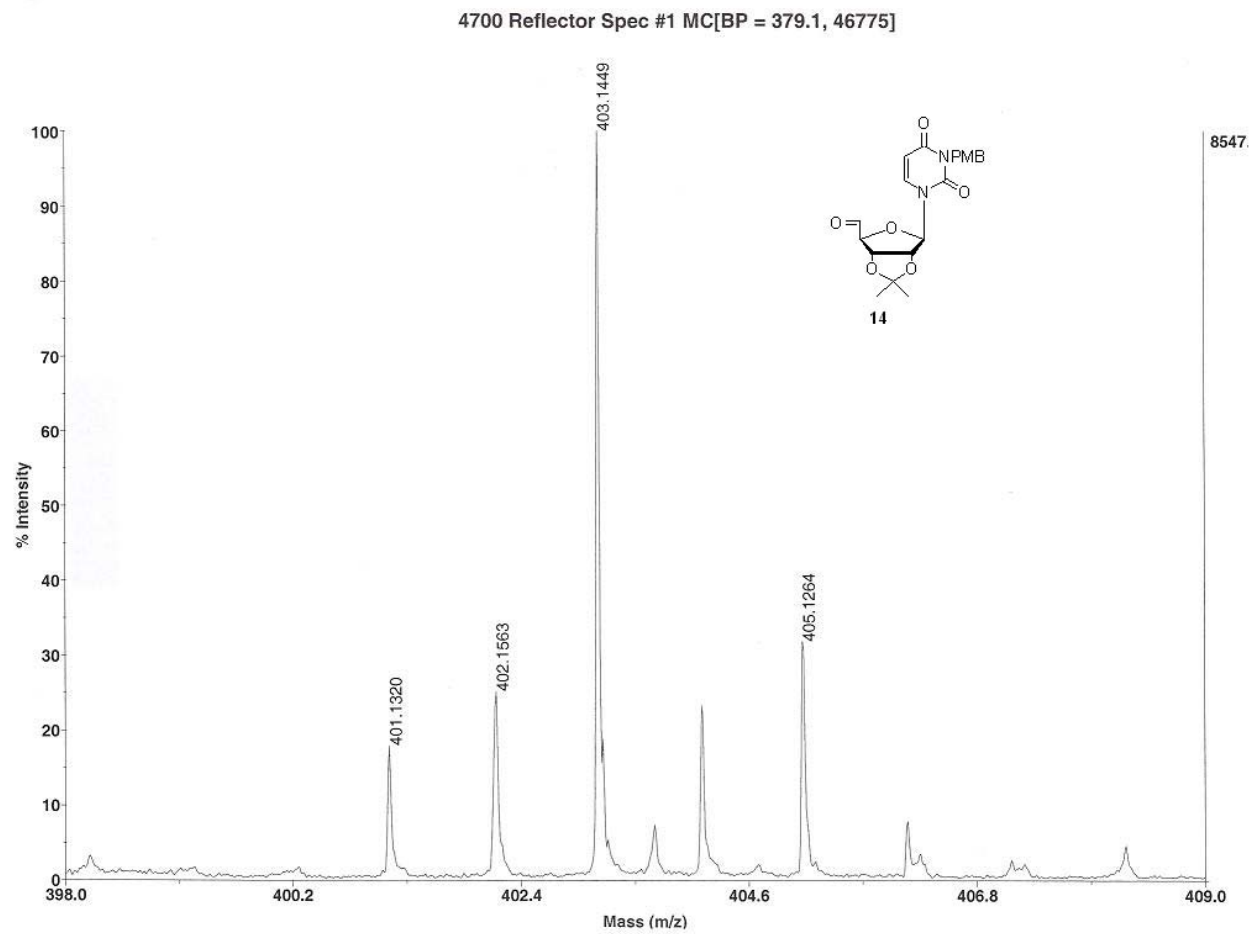

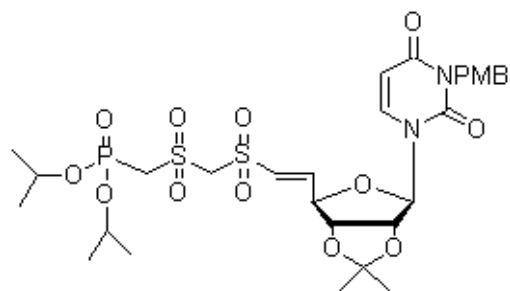

15

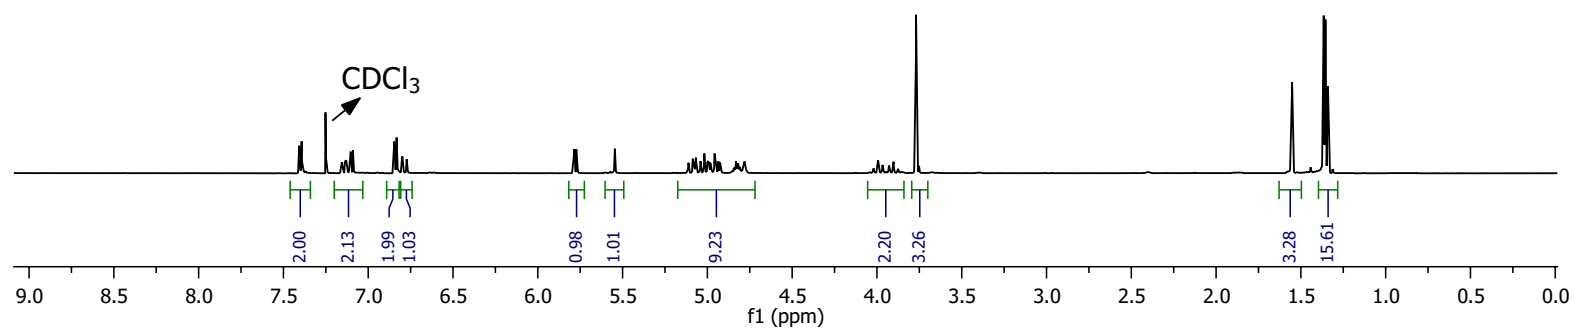

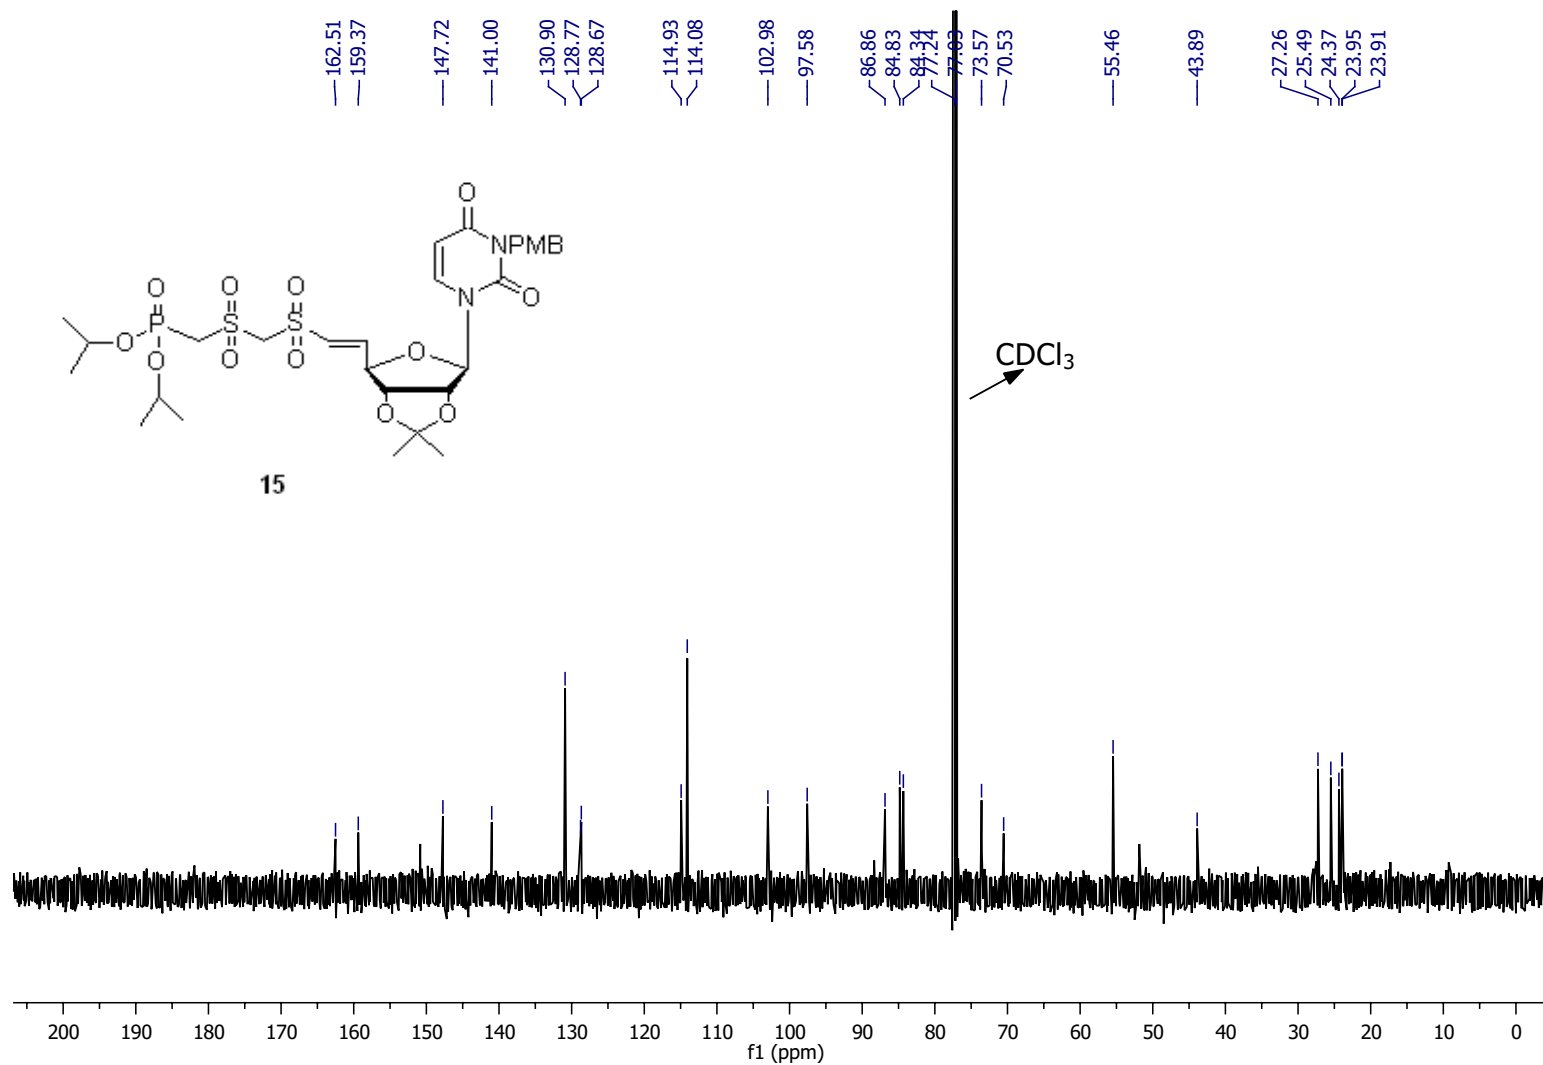



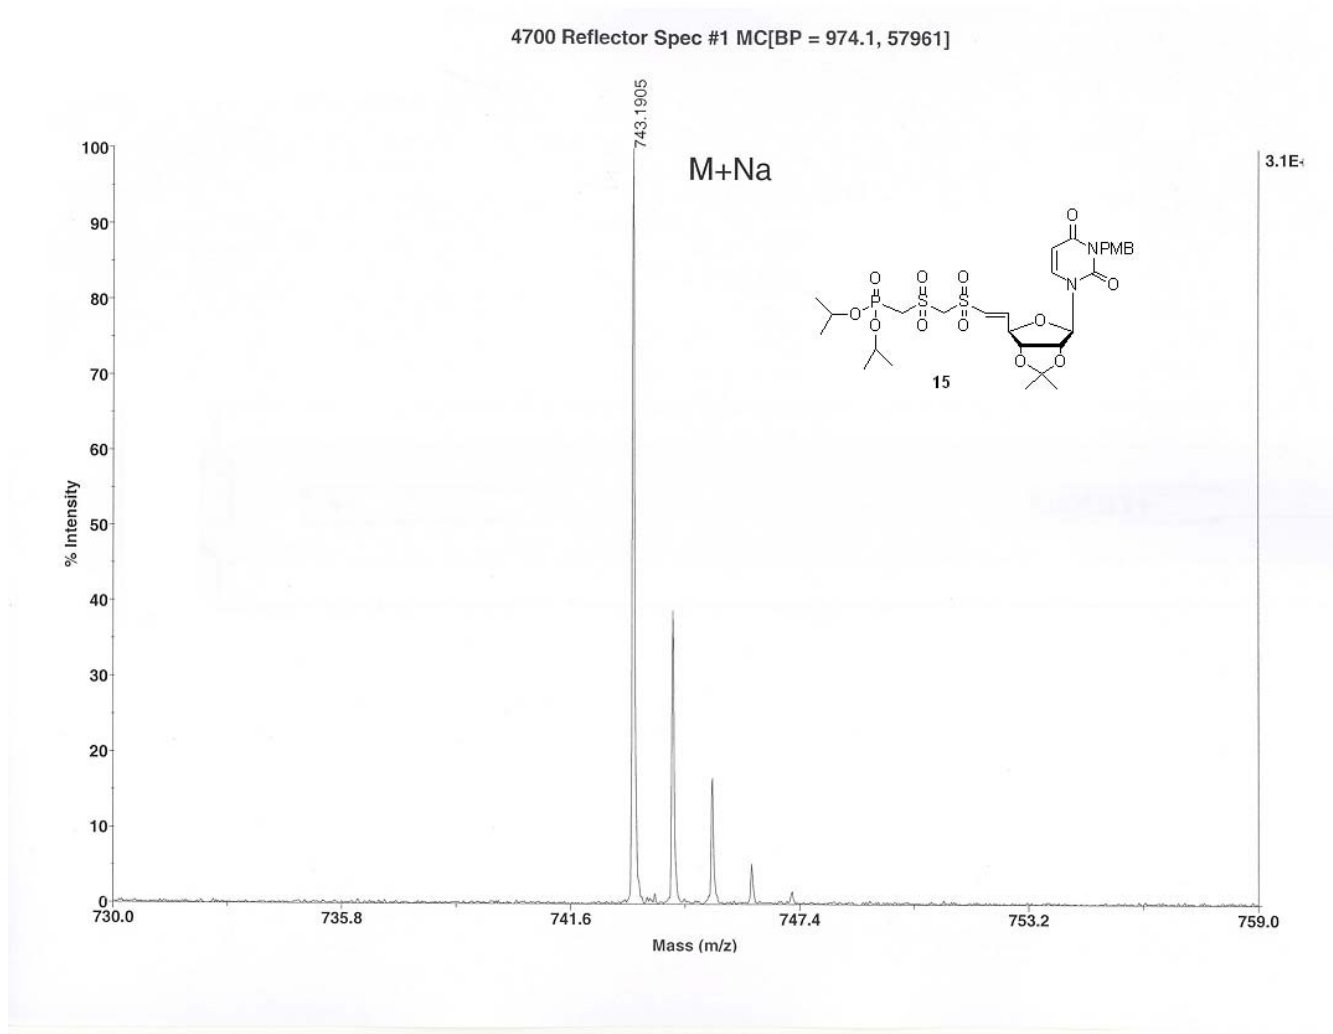

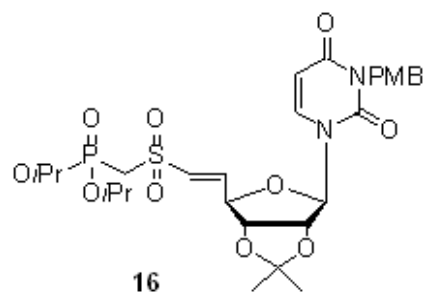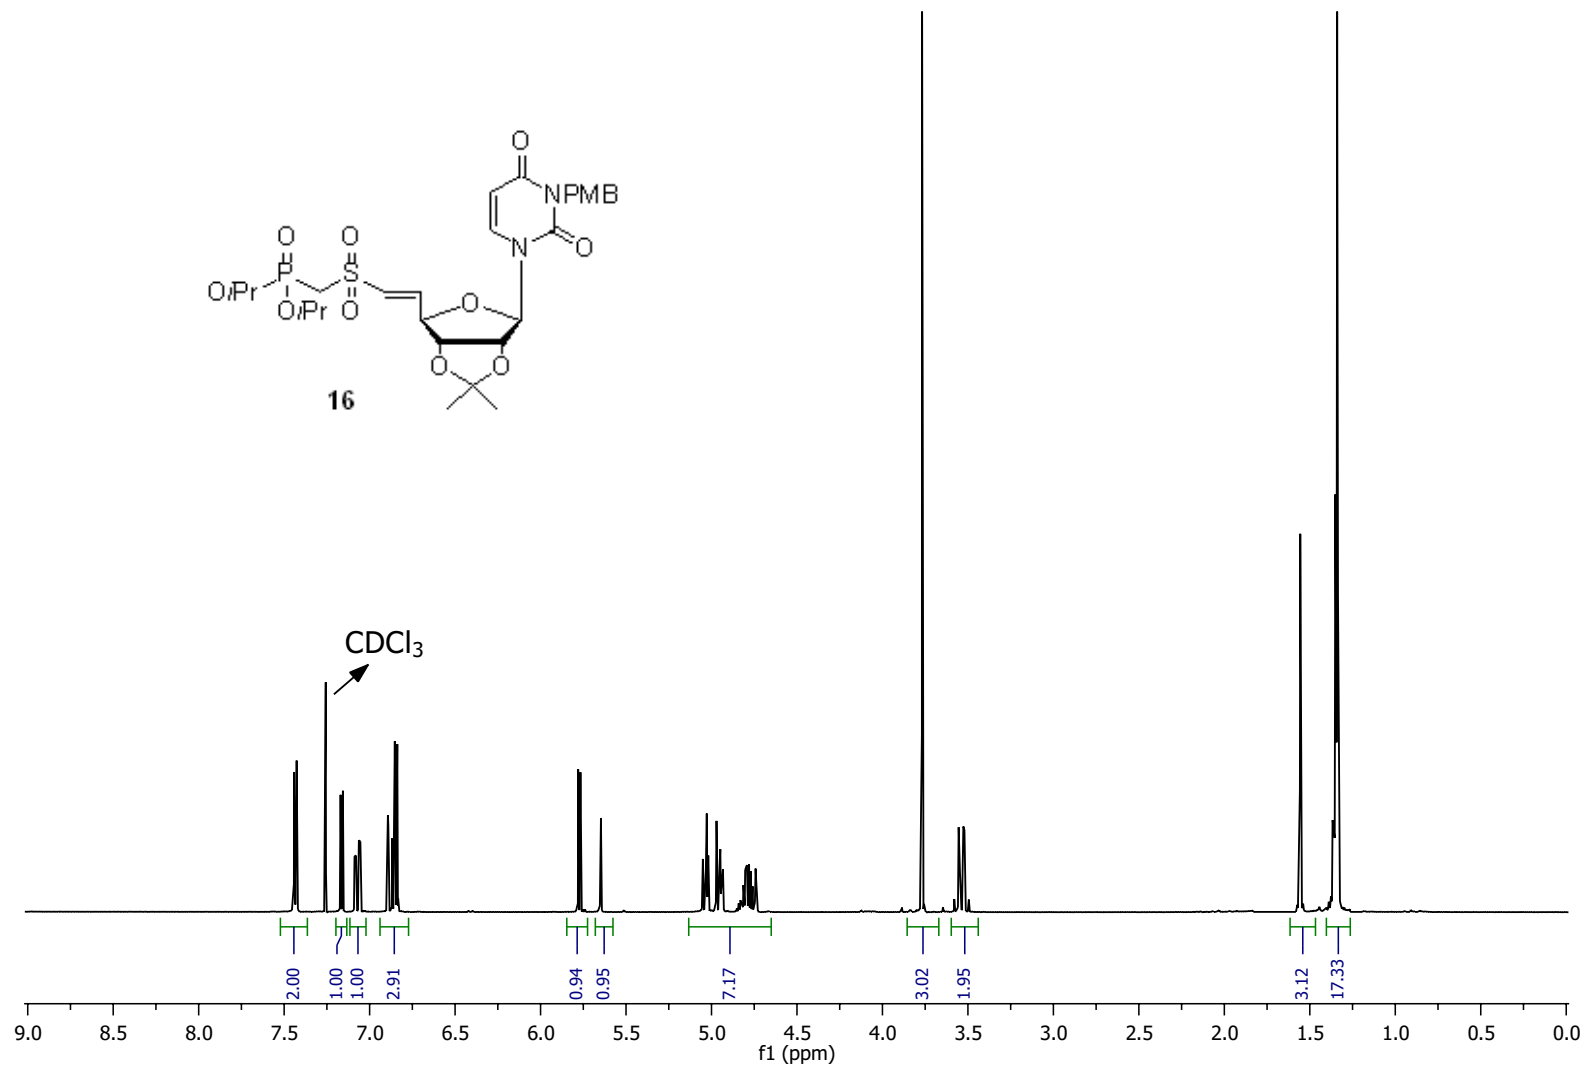

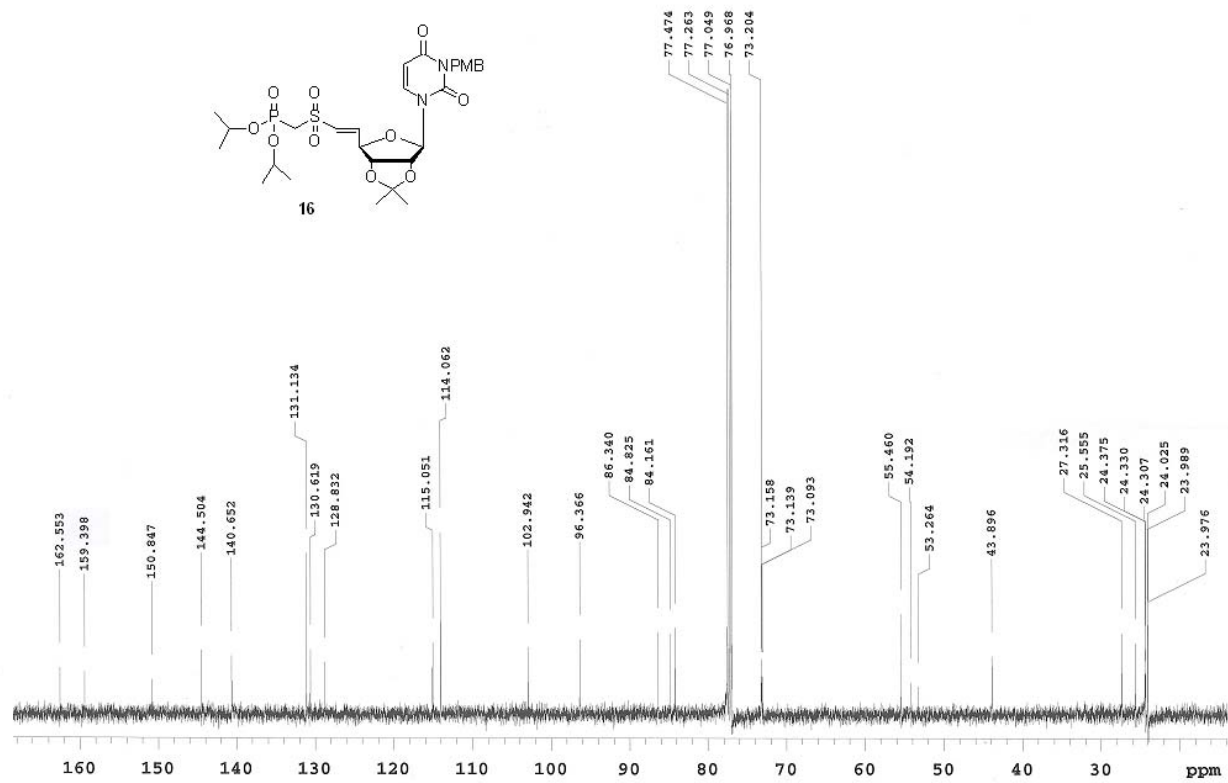

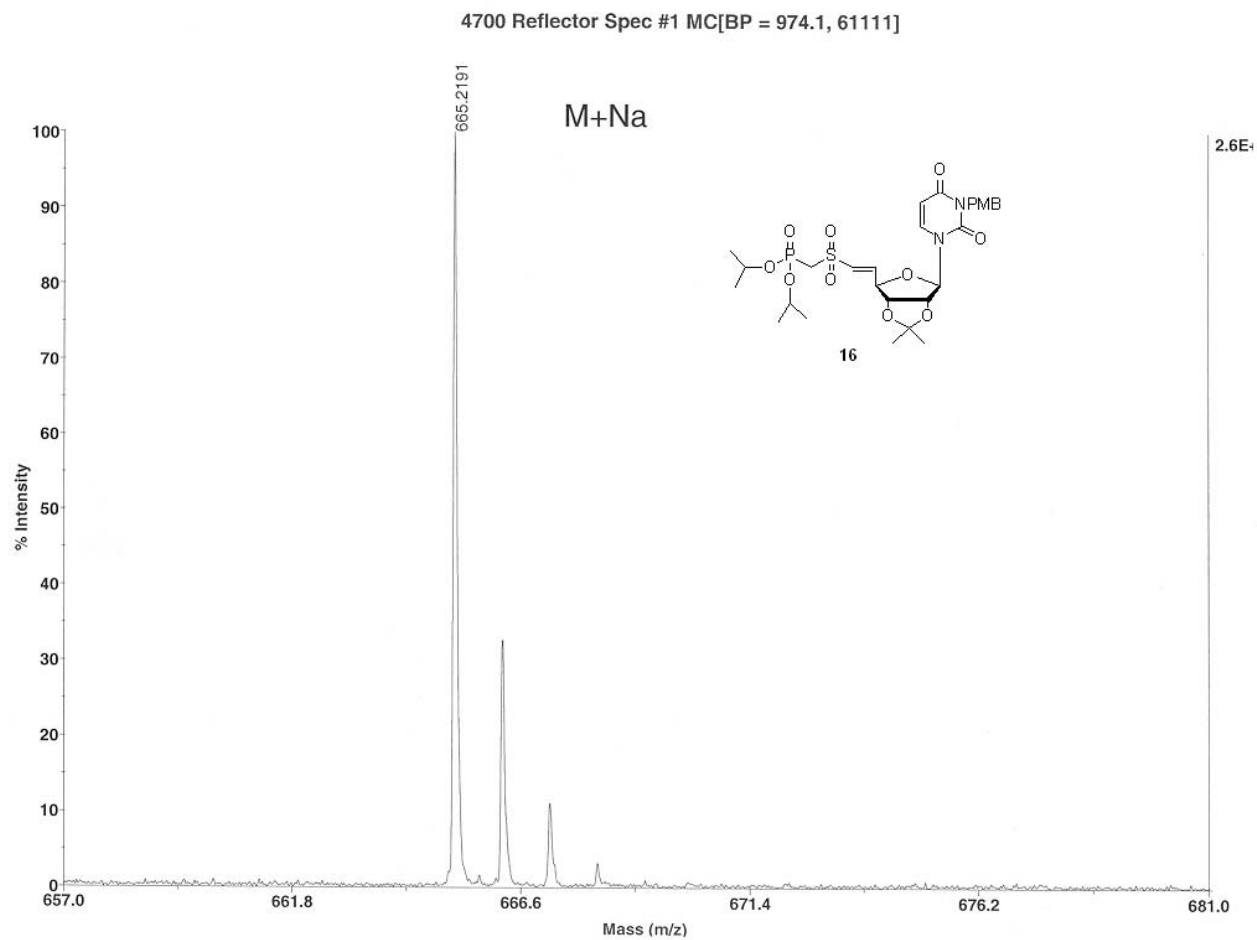

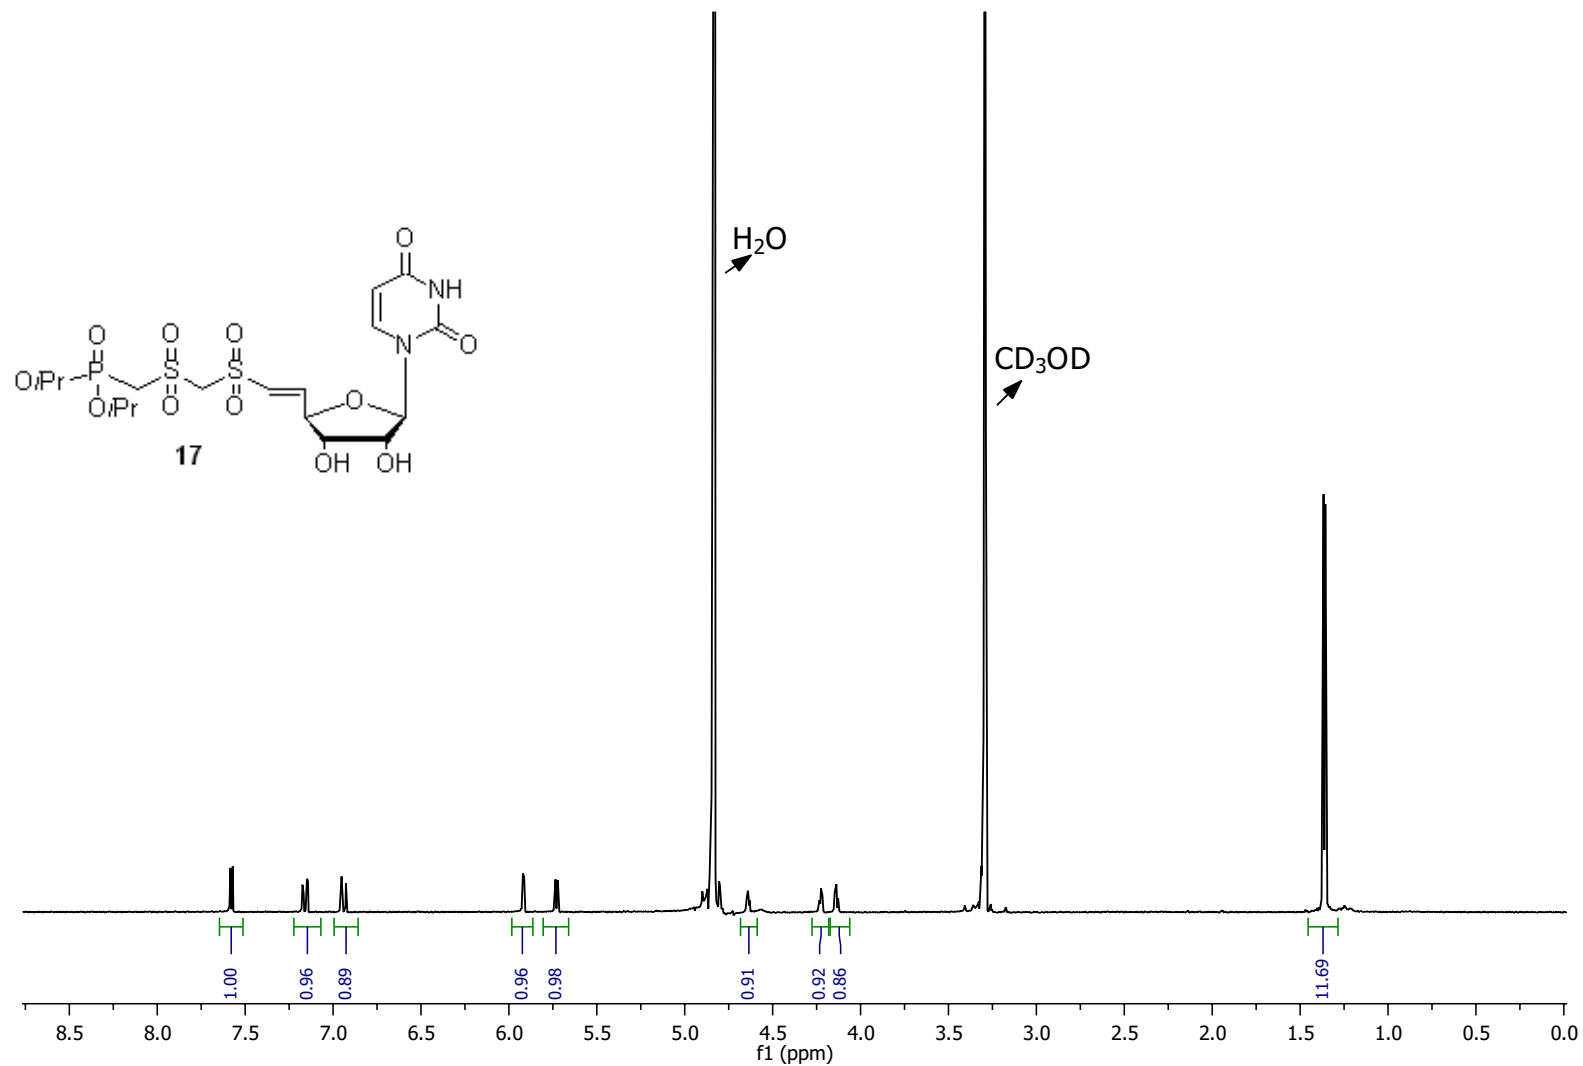

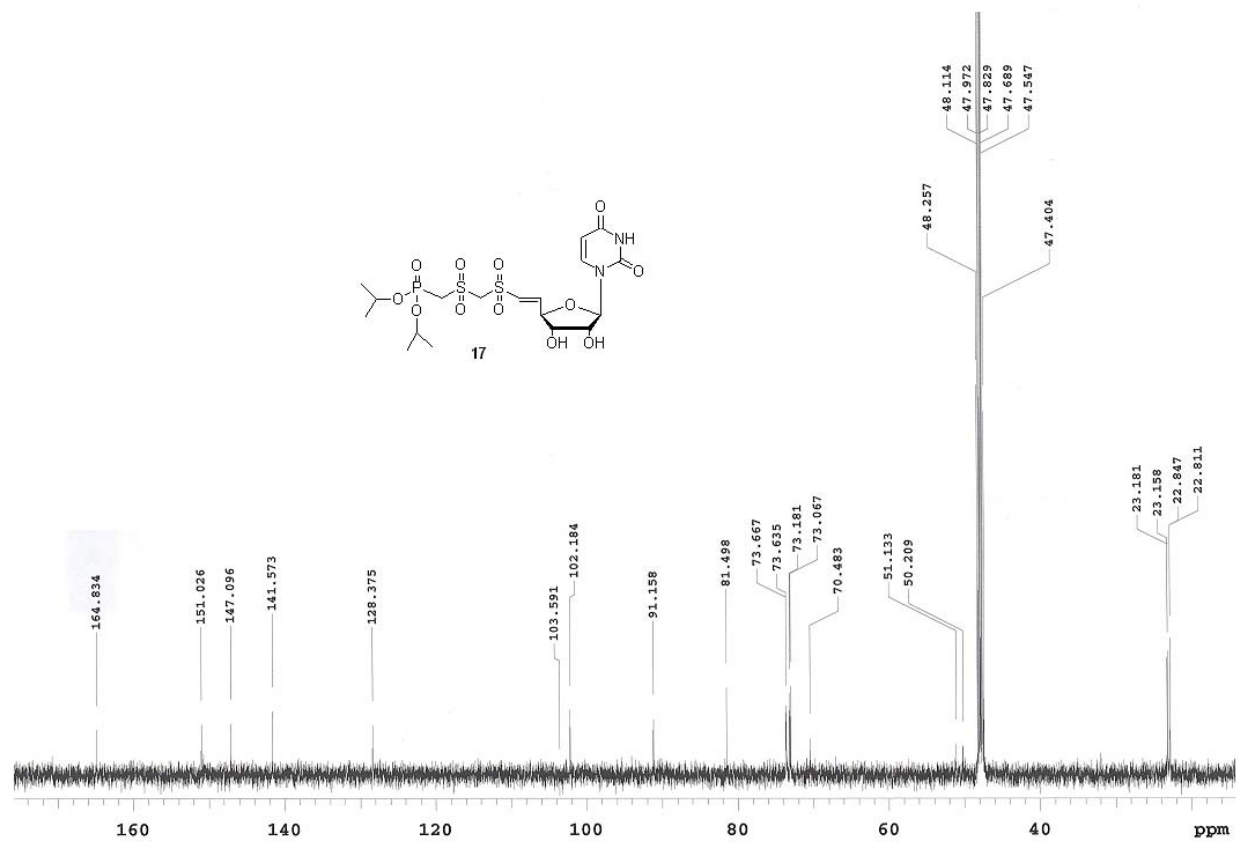

978 #91-164 RT: 1.34-2.44 AV: 74 NL: 1.24E7  
T: FTMS + c ESI Full ms [250.00-1000.00]

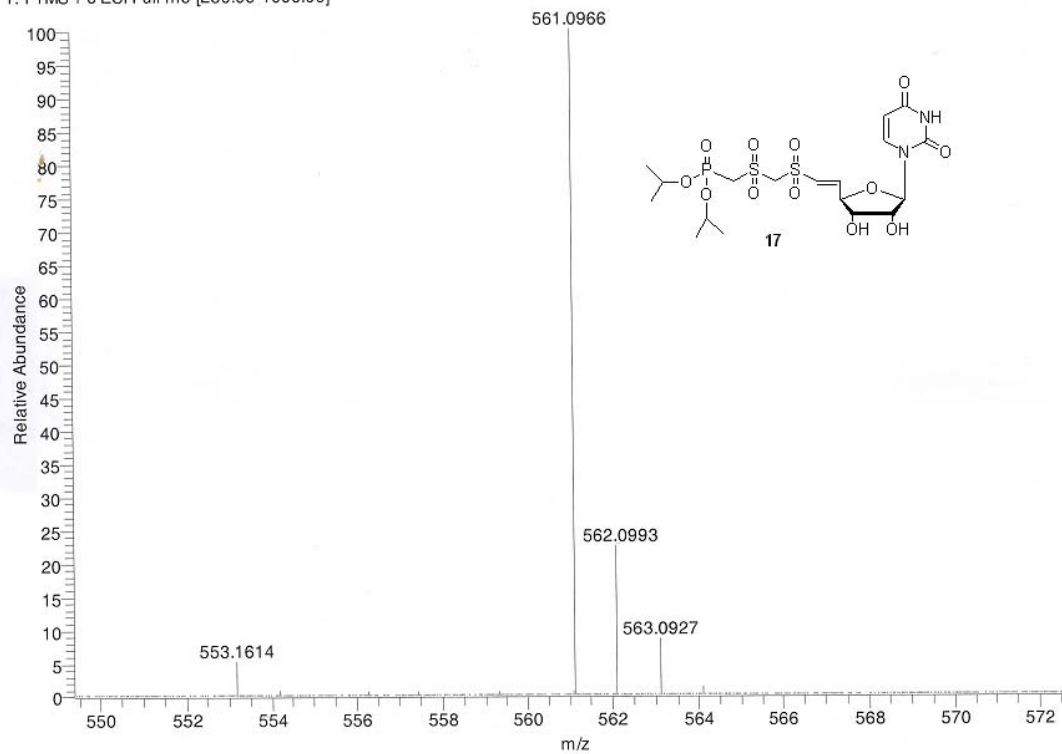

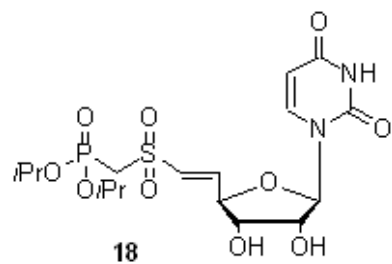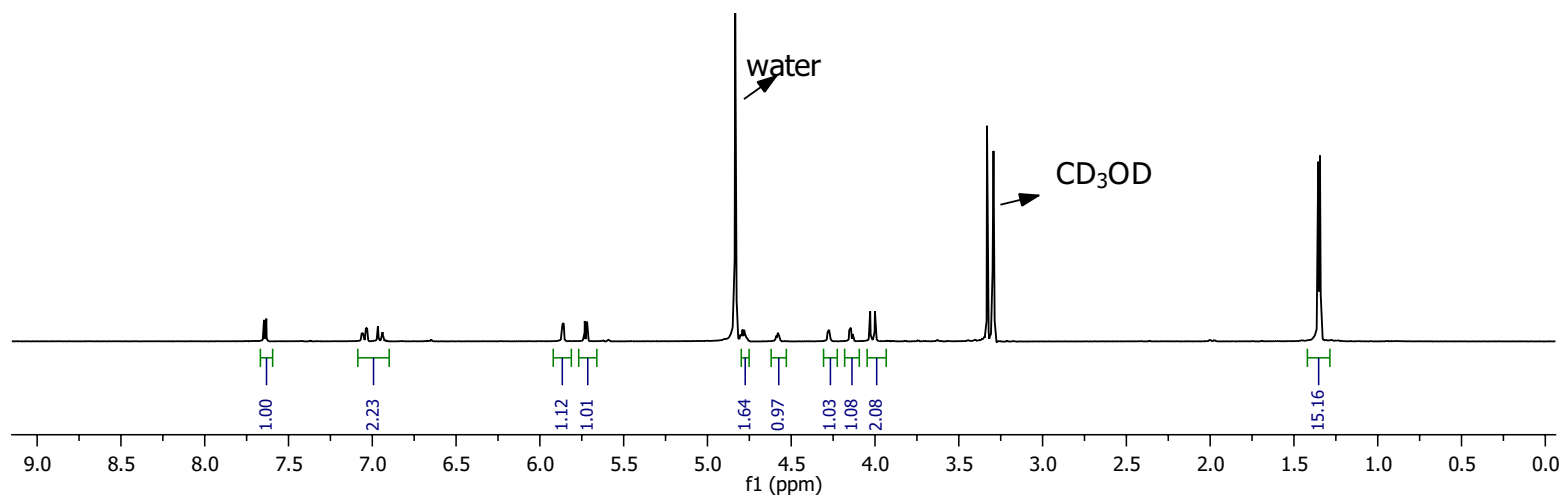



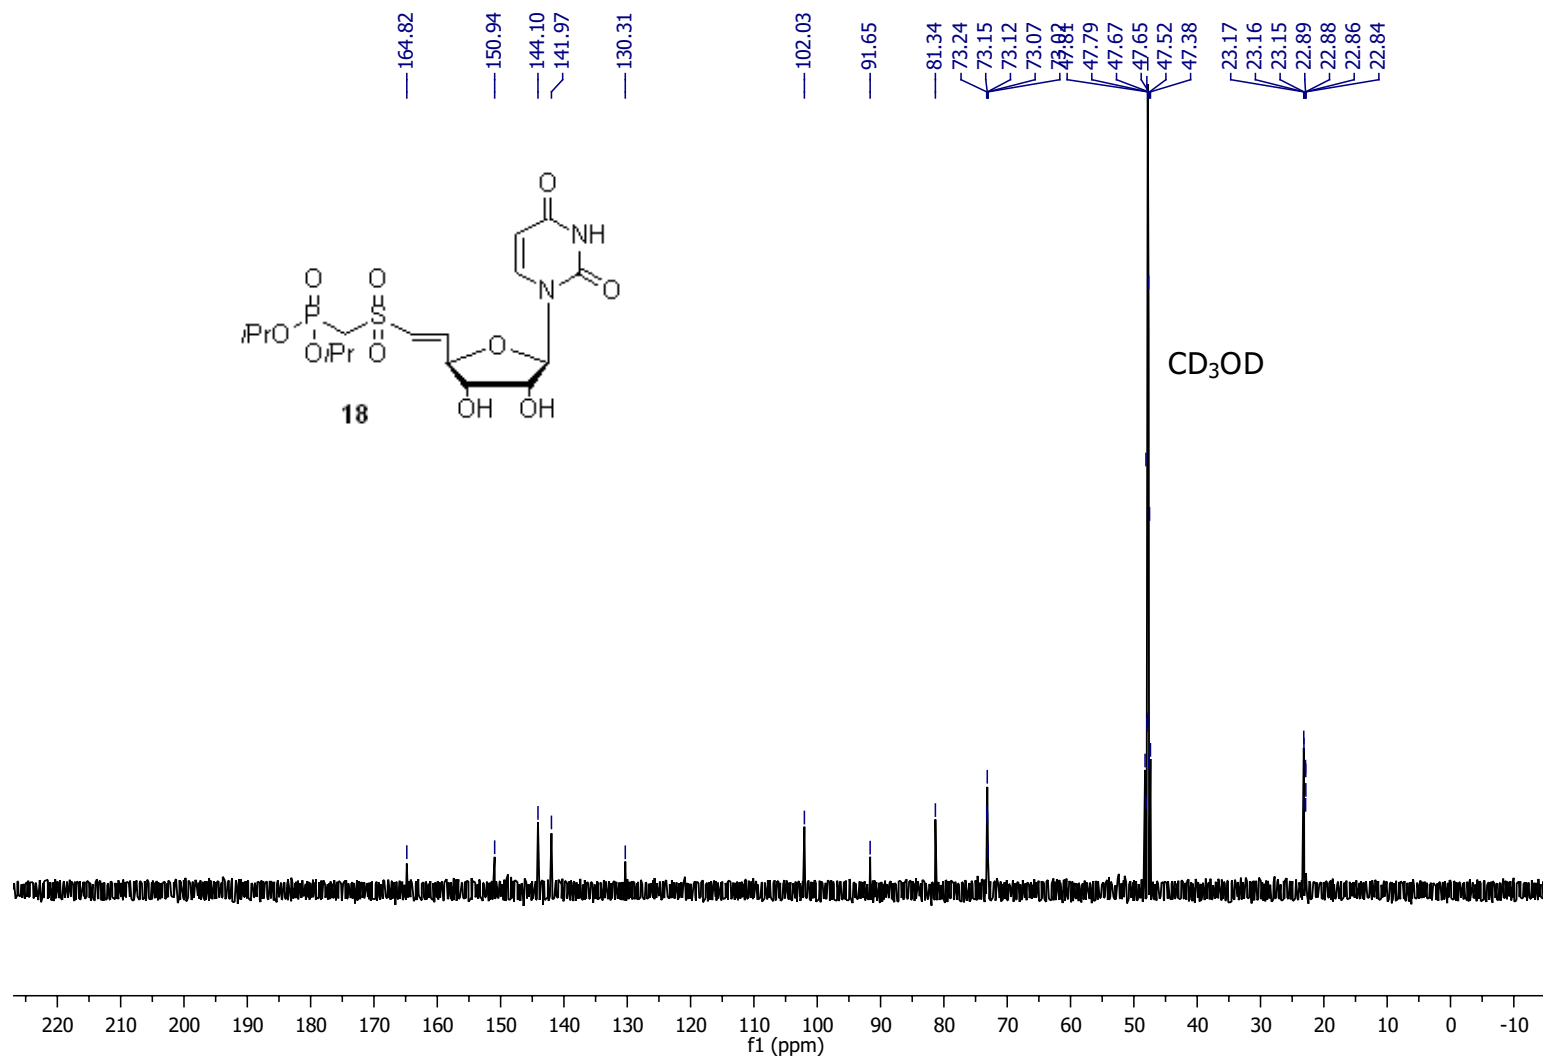

901\_080625103212 #332-349 RT: 4.90-5.15 AV: 18 NL: 3.21E7  
T: FTMS + p ESI Full ms [150.00-1000.00]

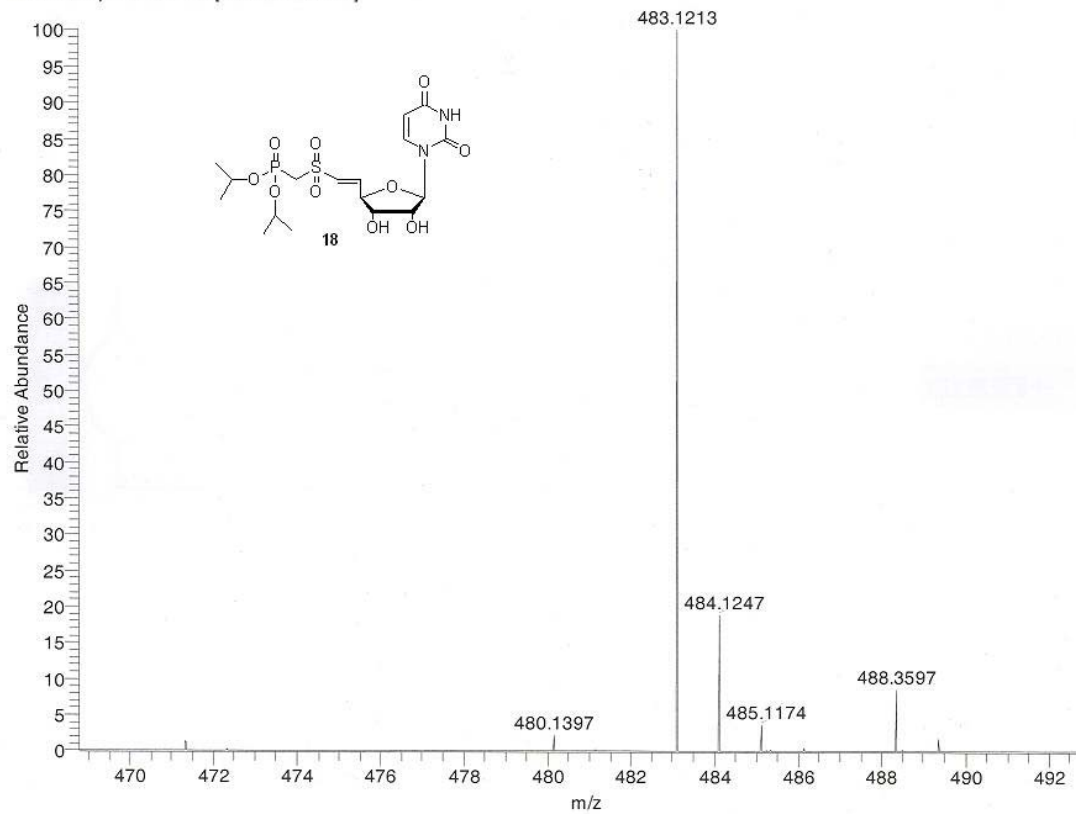

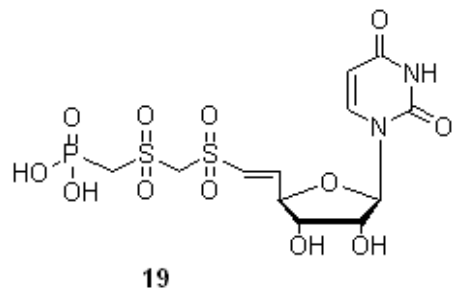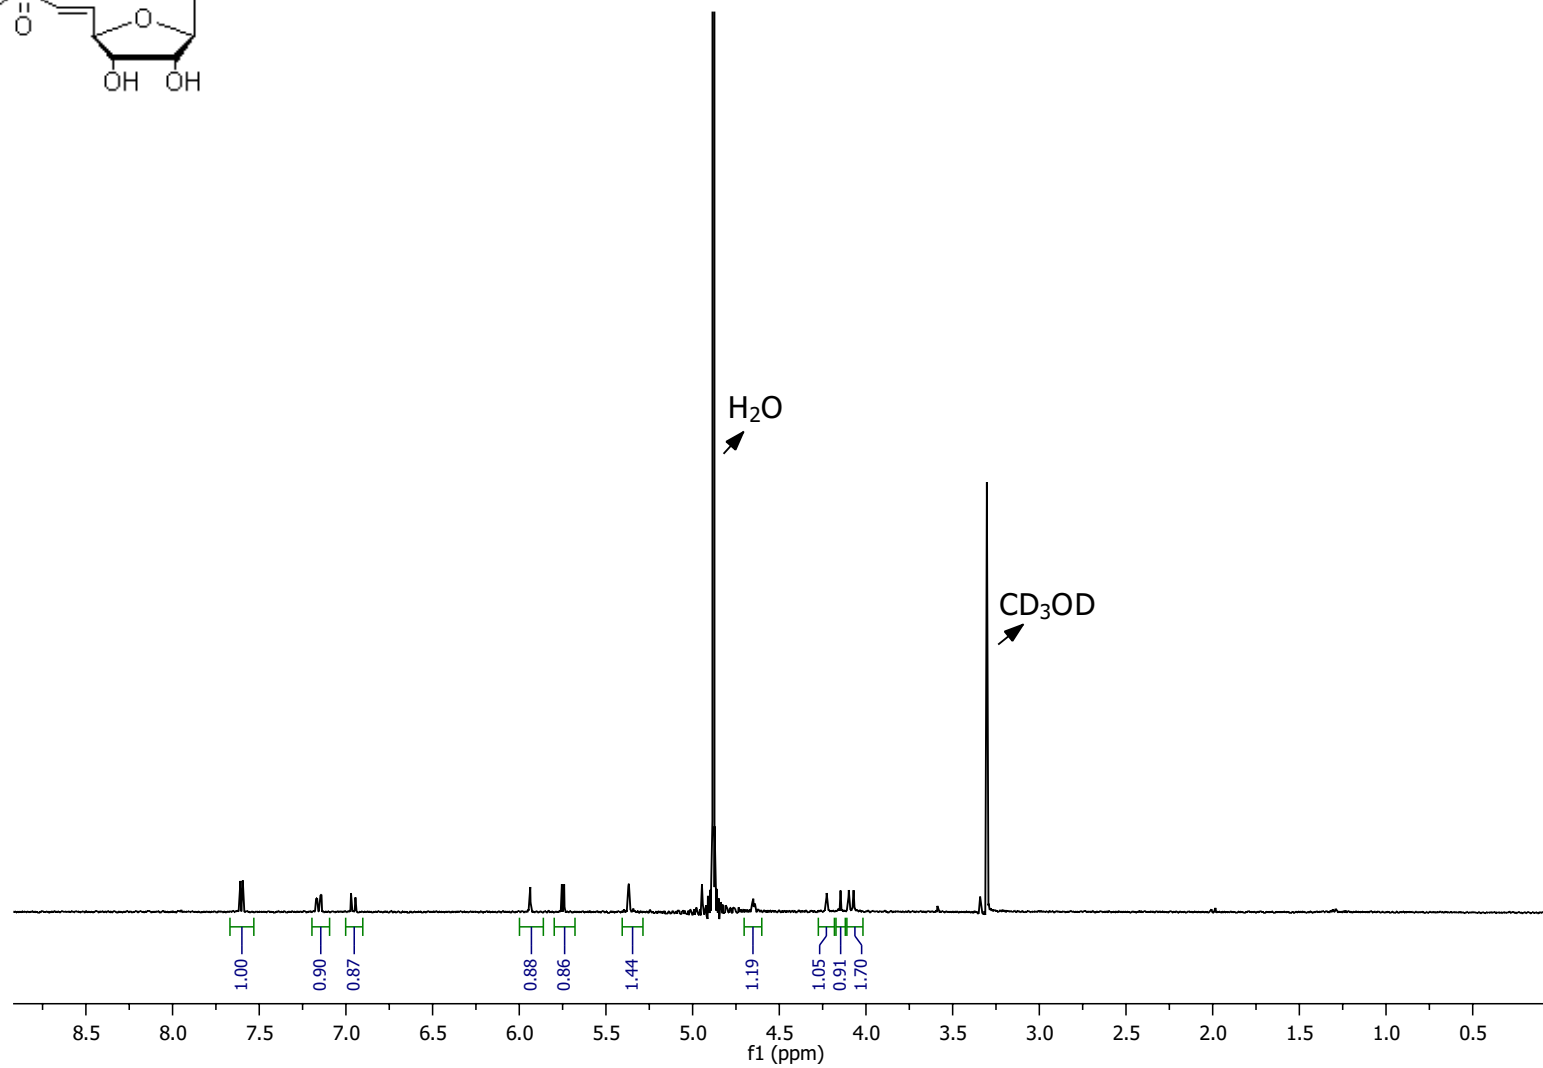

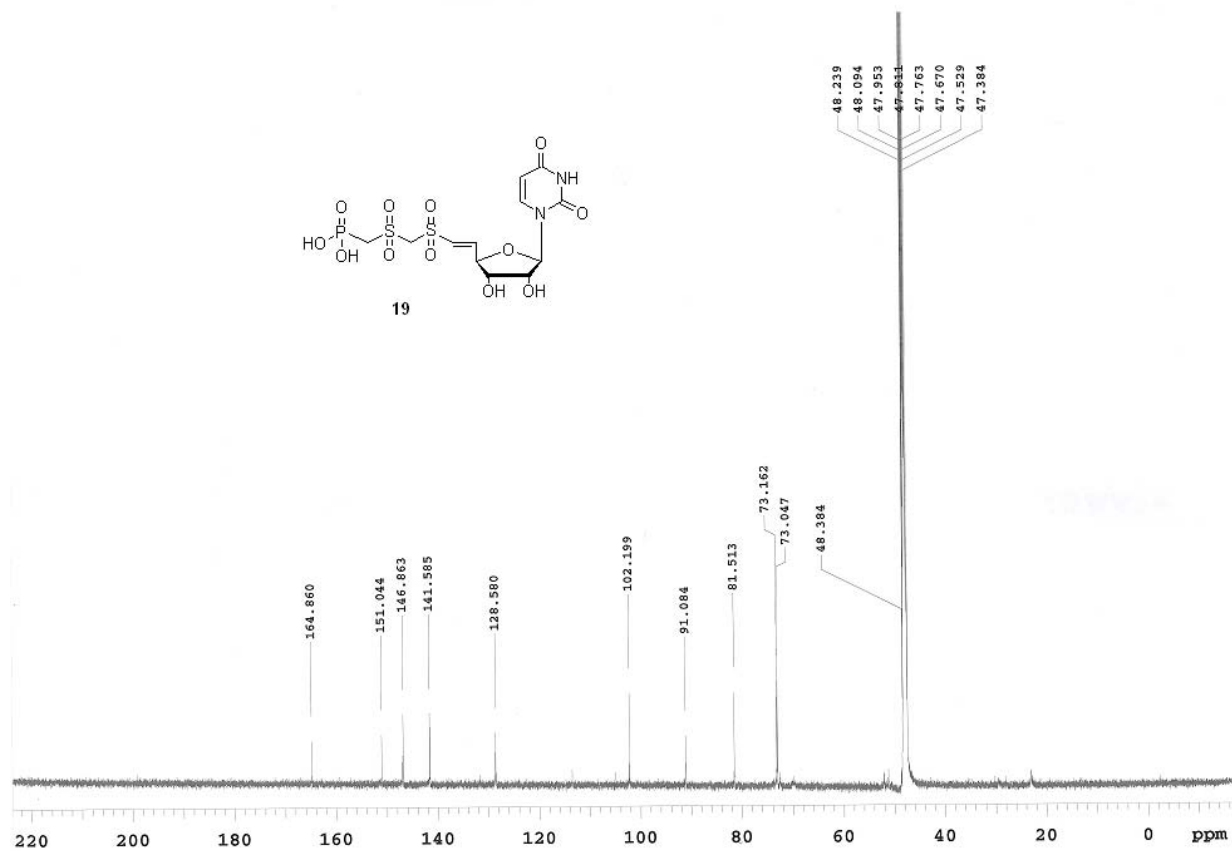

979 #197-216 RT: 3.16-3.45 AV: 20 NL: 5.07E6  
T: FTMS + c ESI Full ms [250.00-1000.00]

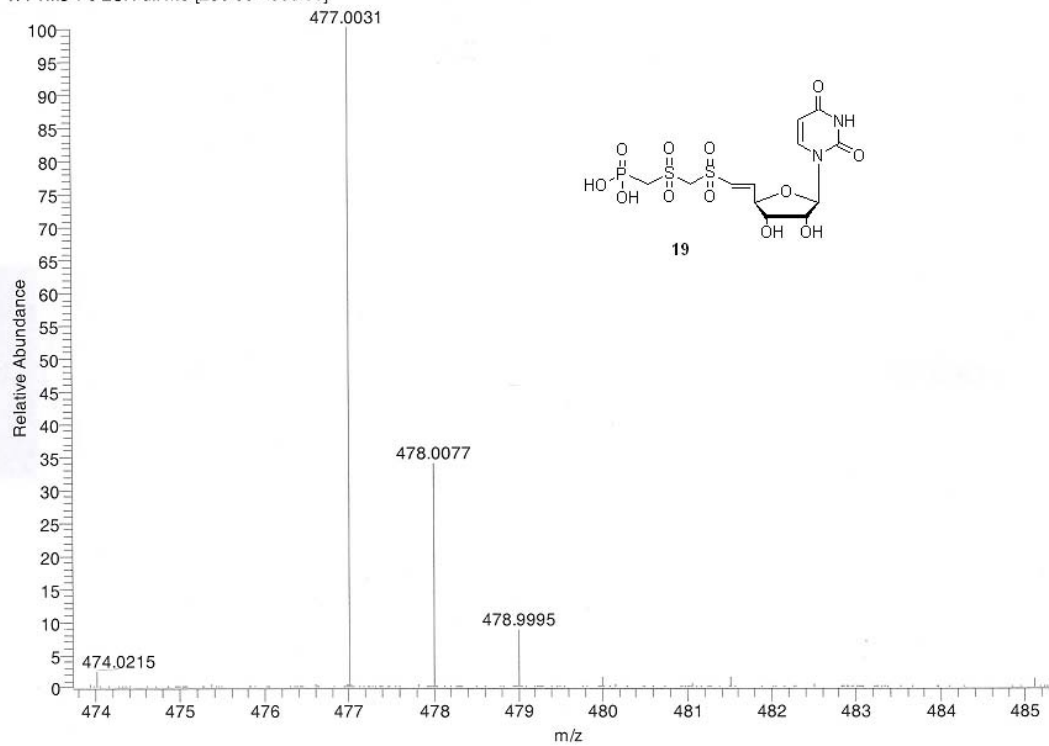

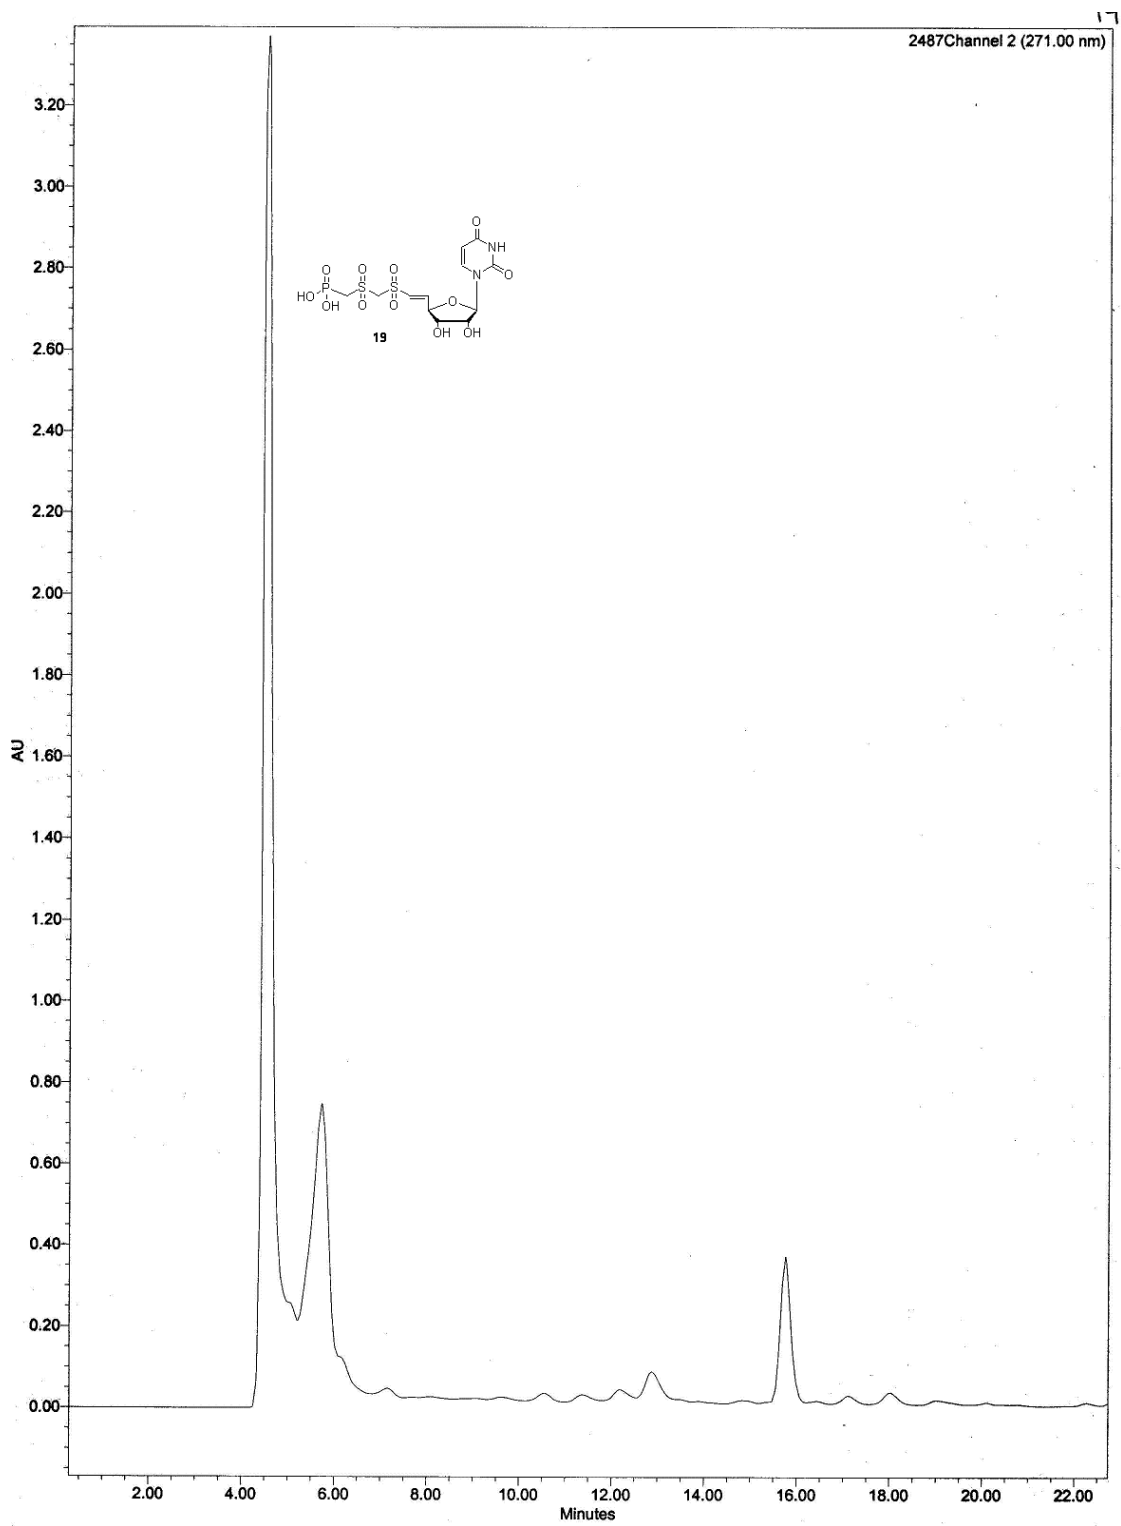

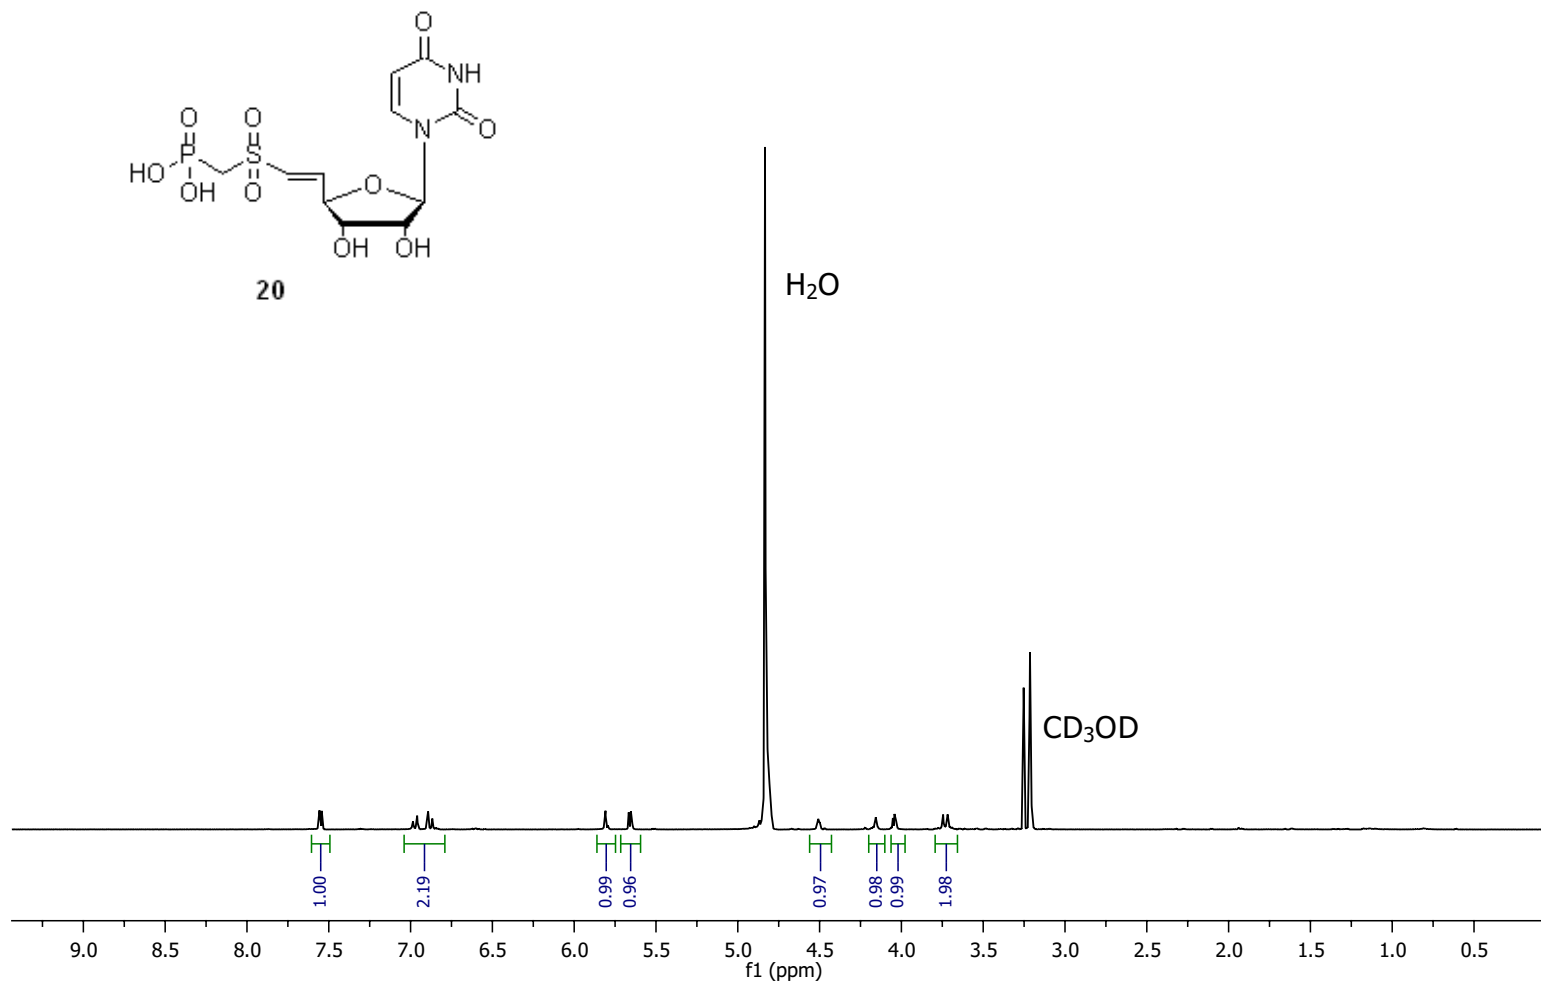

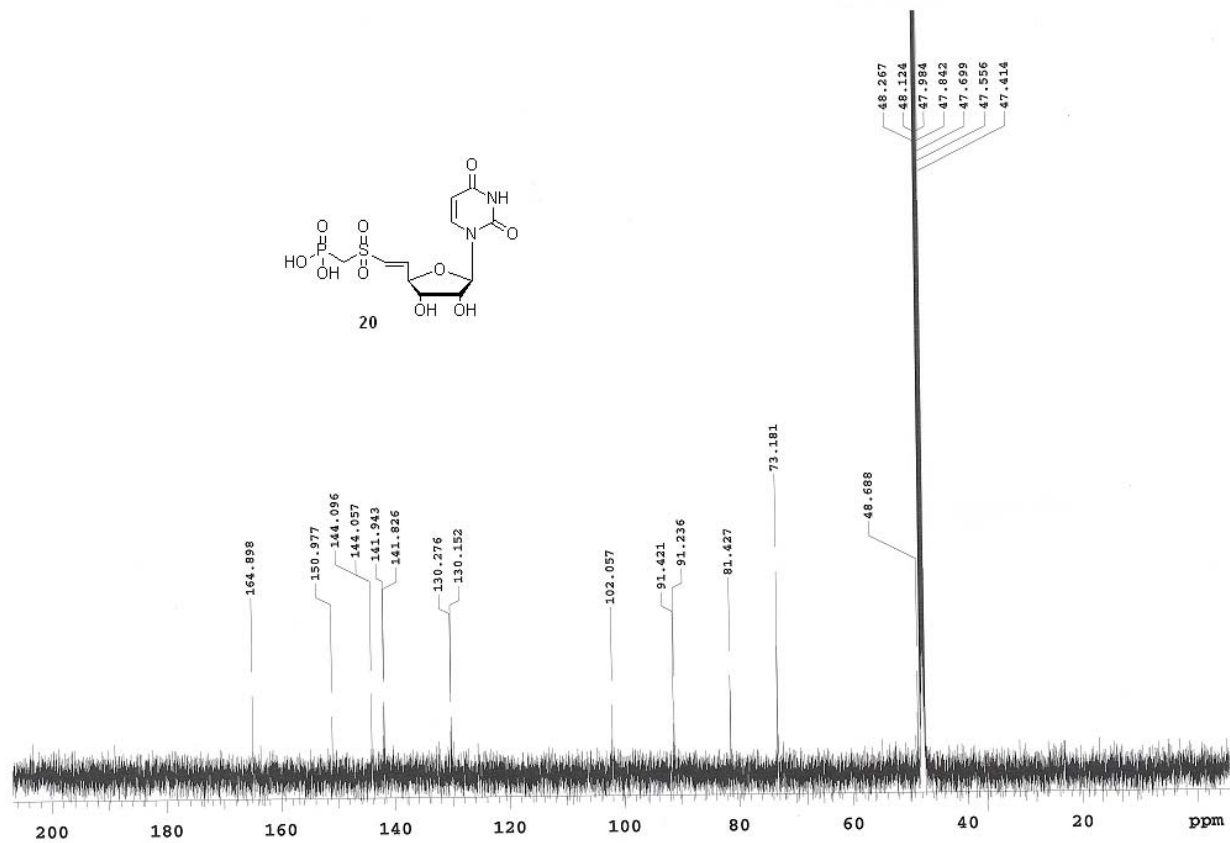



909 #386-400 RT: 6.40-6.63 AV: 15 NL: 1.63E7  
T: FTMS + c ESI Full ms [150.00-1000.00]

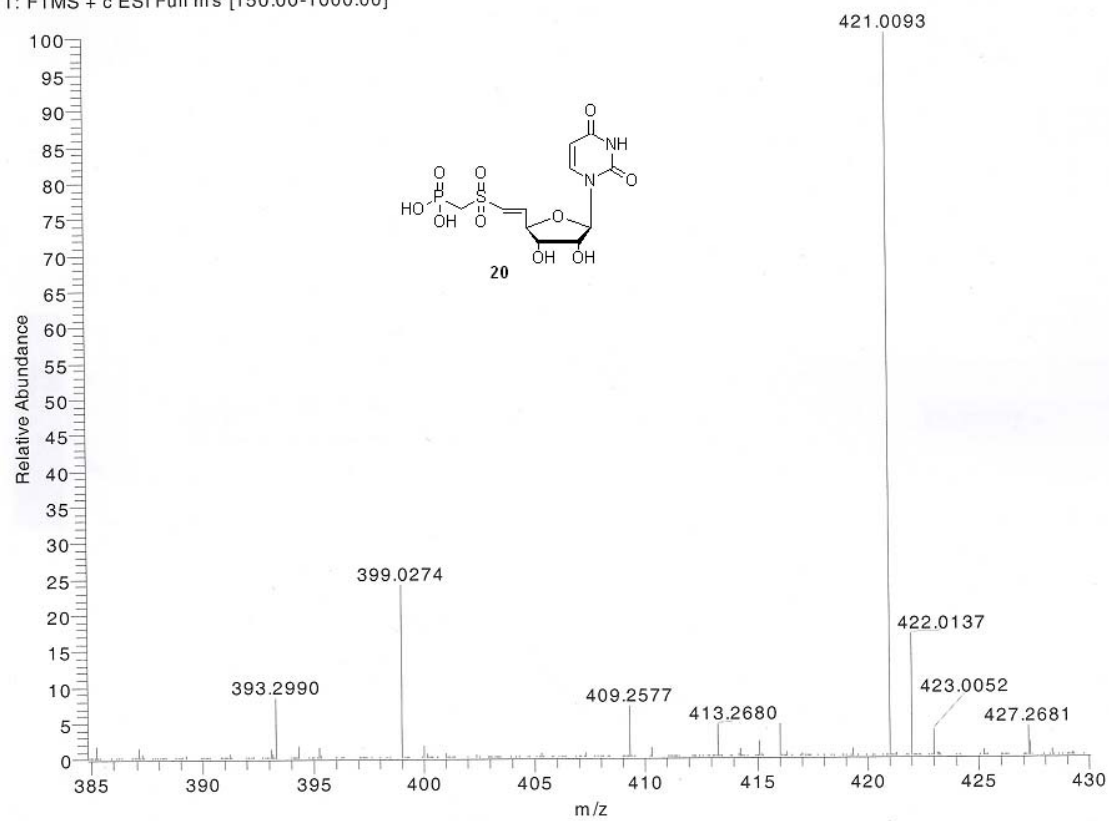

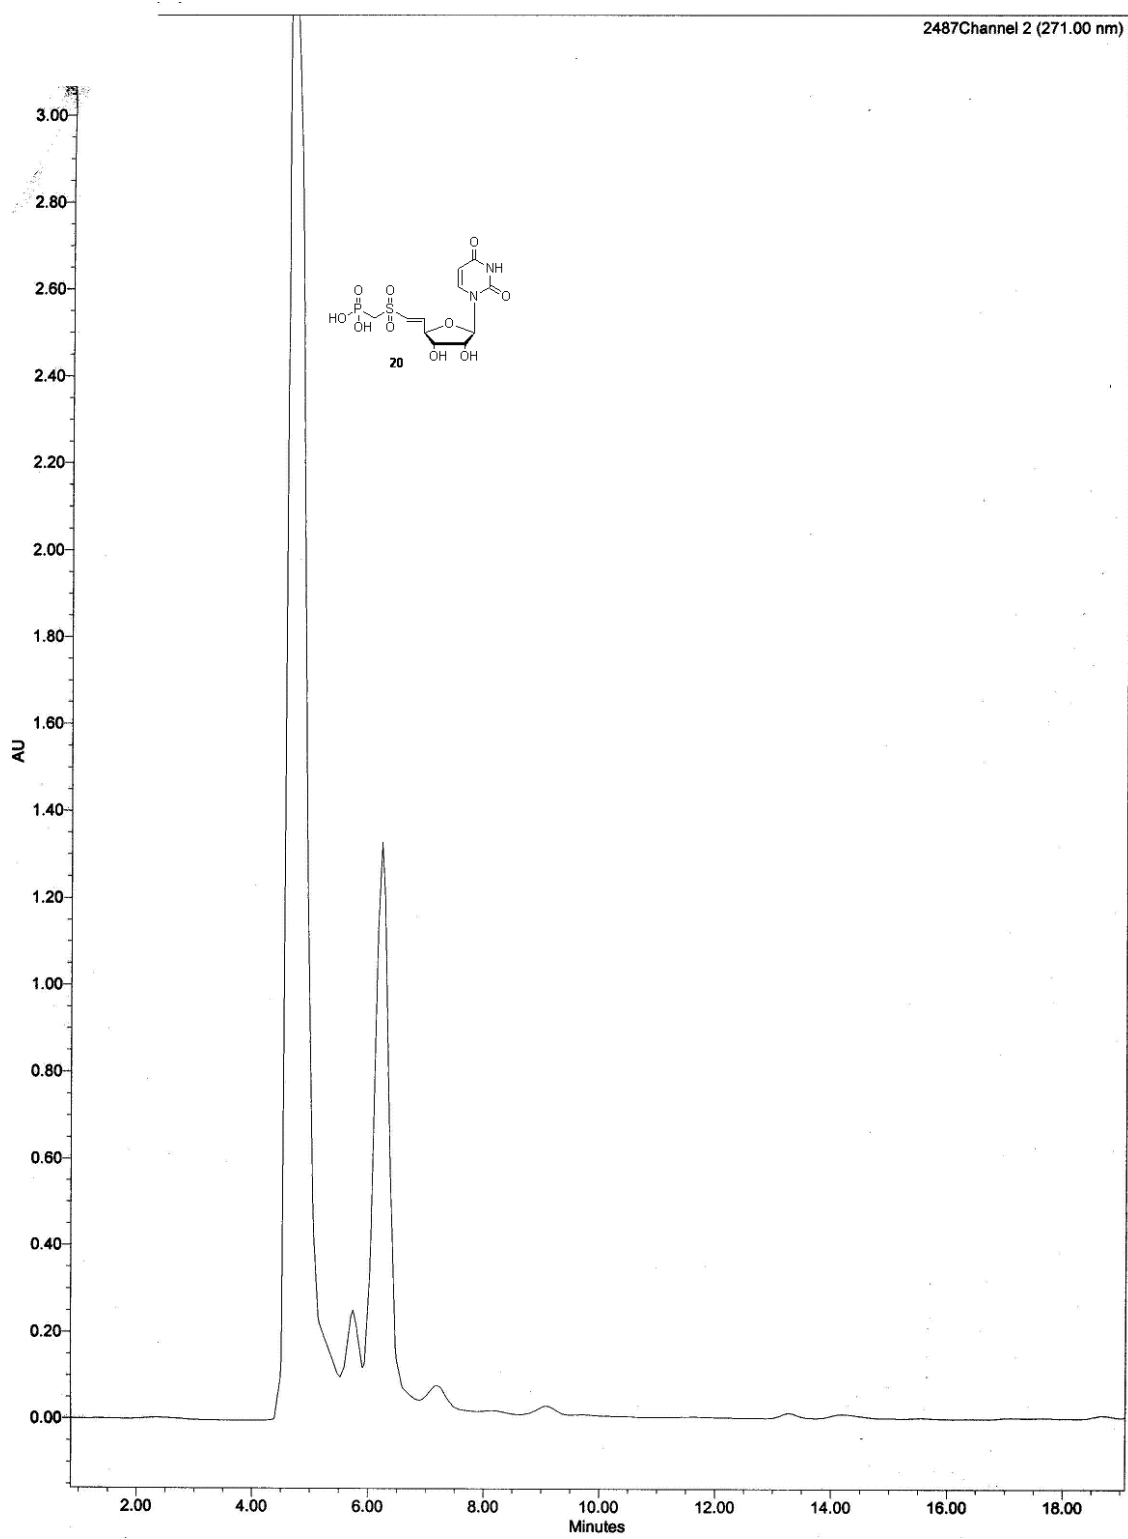

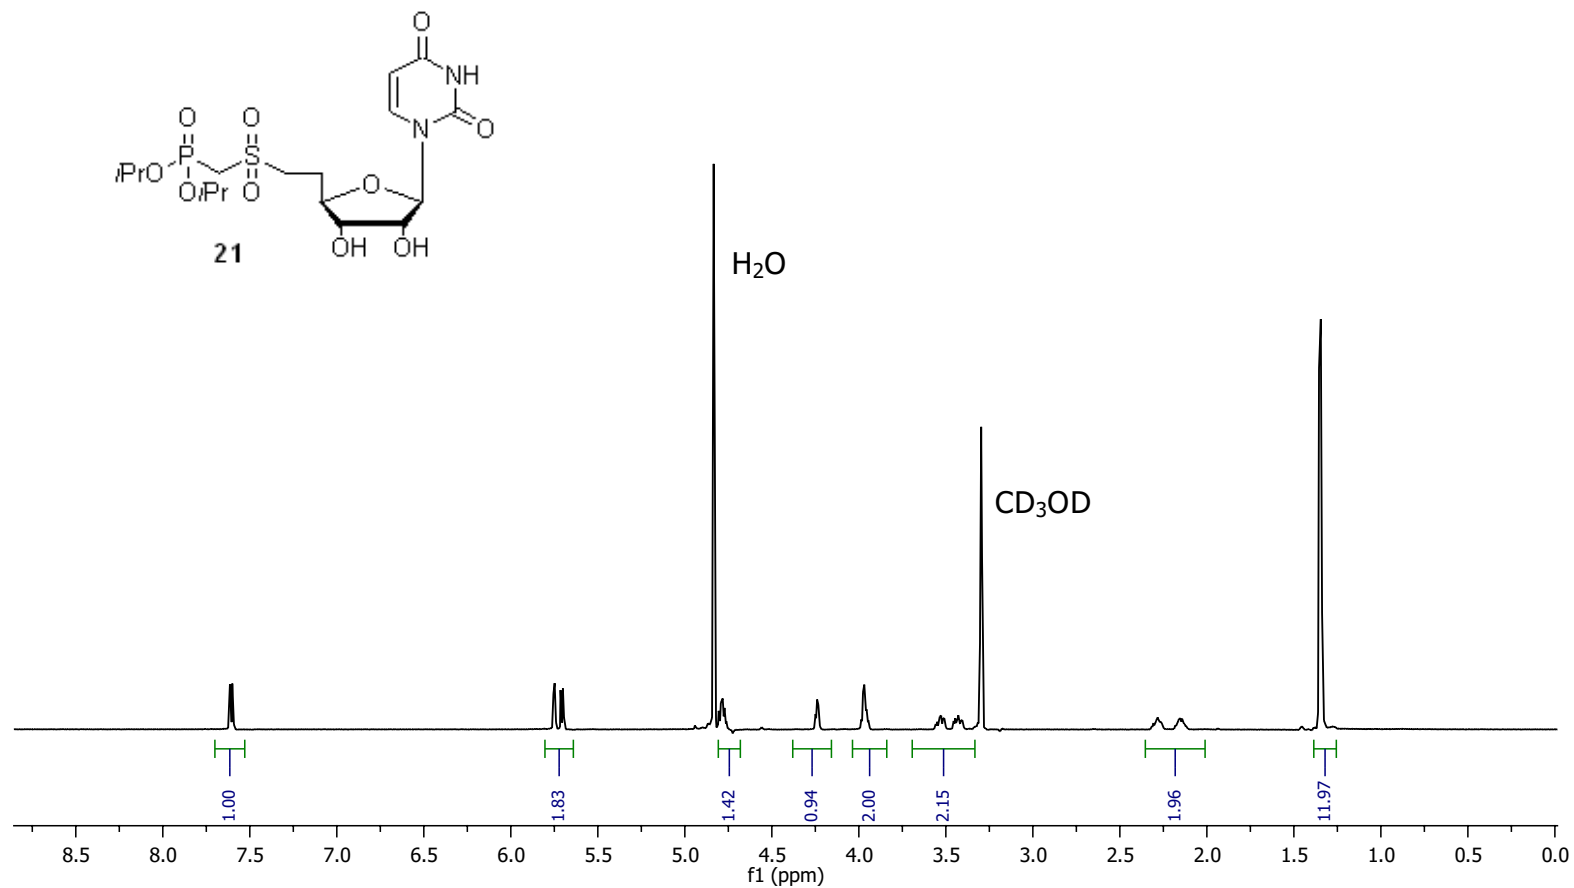

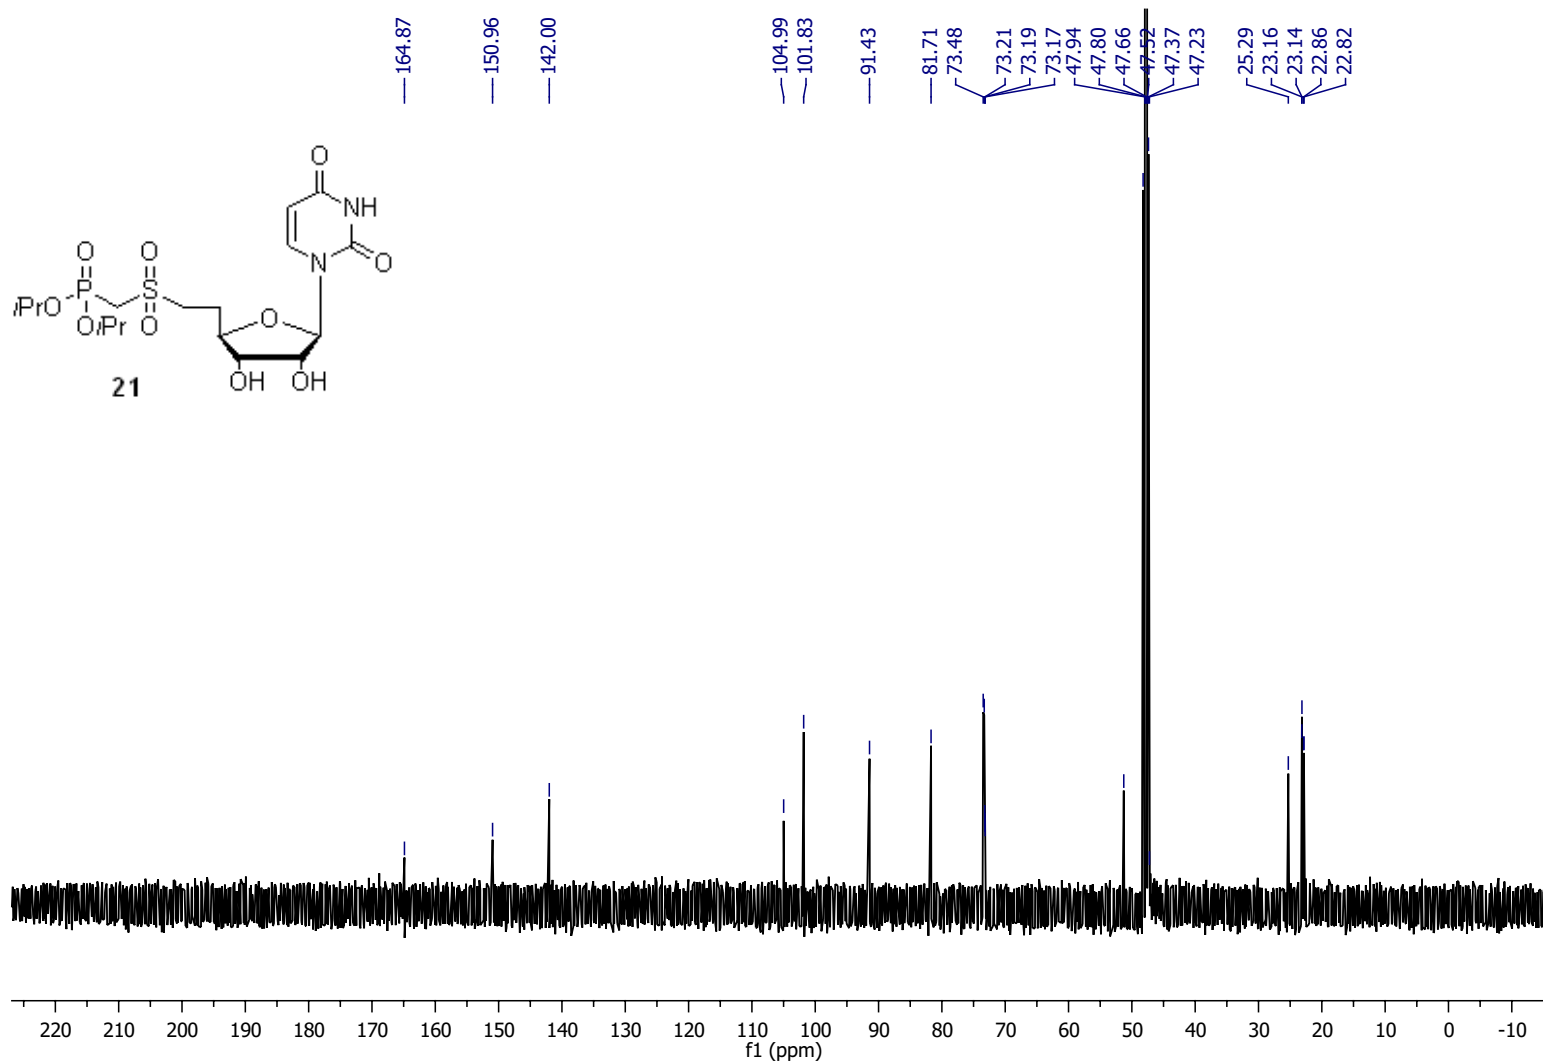

913 #315-332 RT: 4.68-4.95 AV: 18 NL: 1.32E8  
T: FTMS + c ESI Full ms [100.00-700.00]

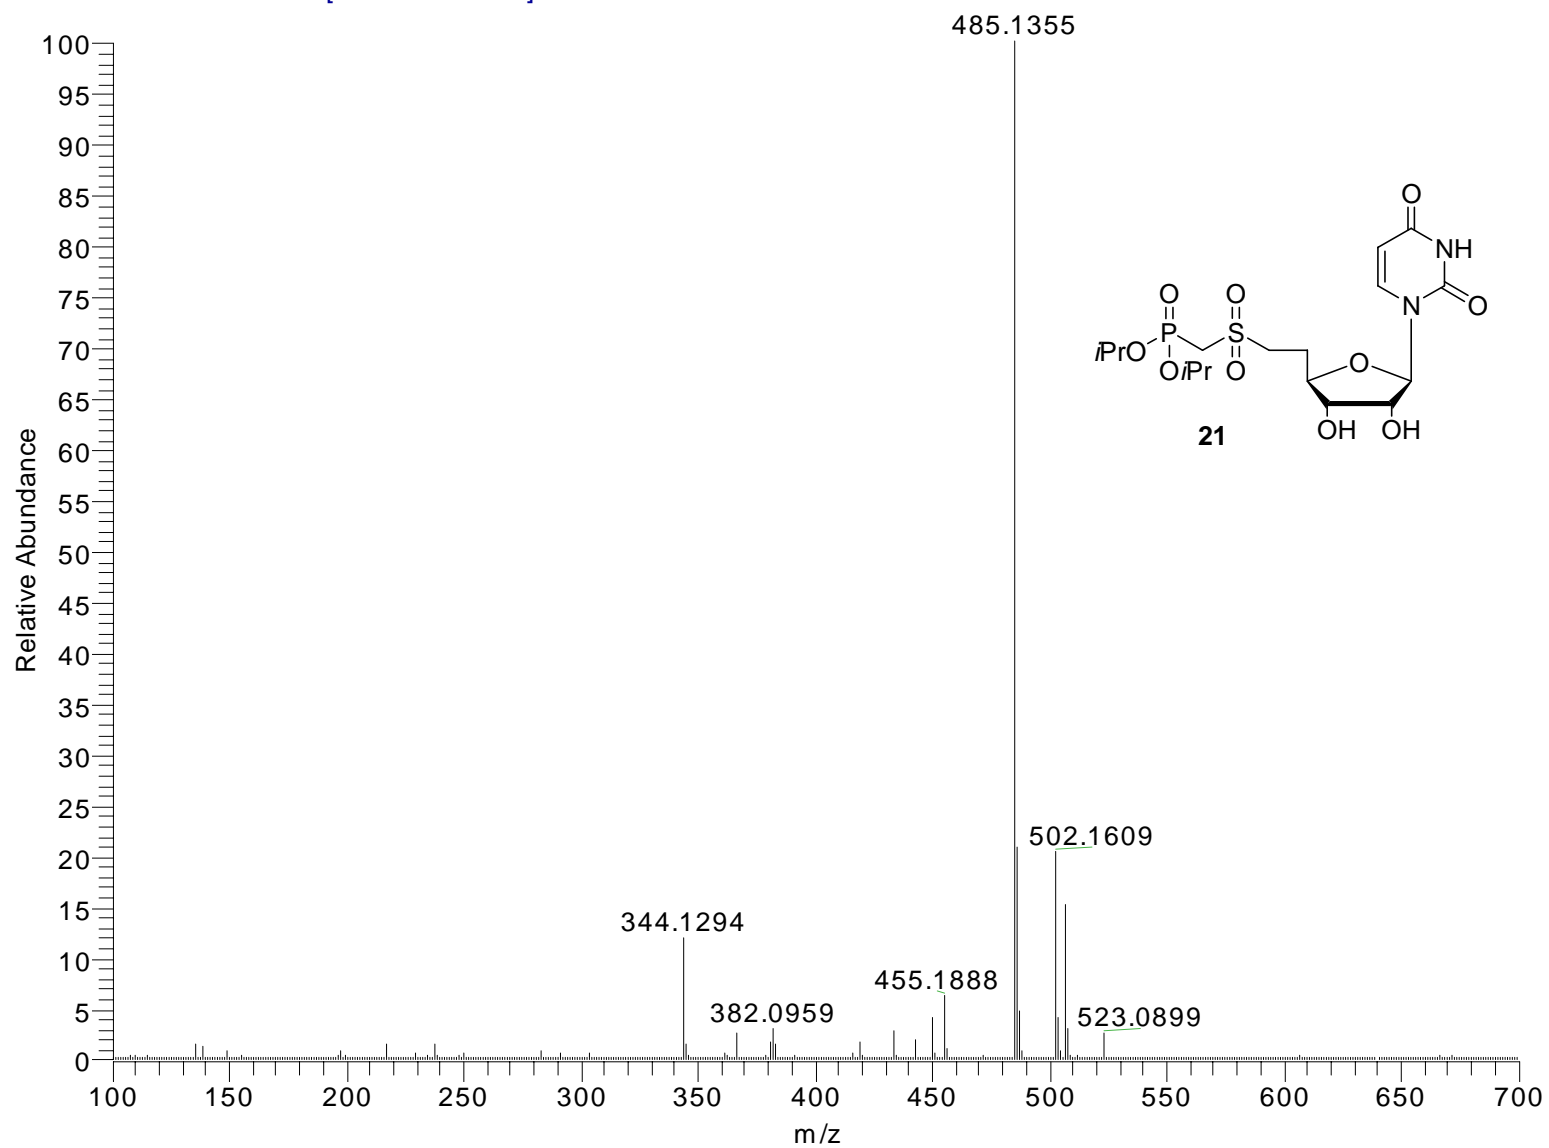

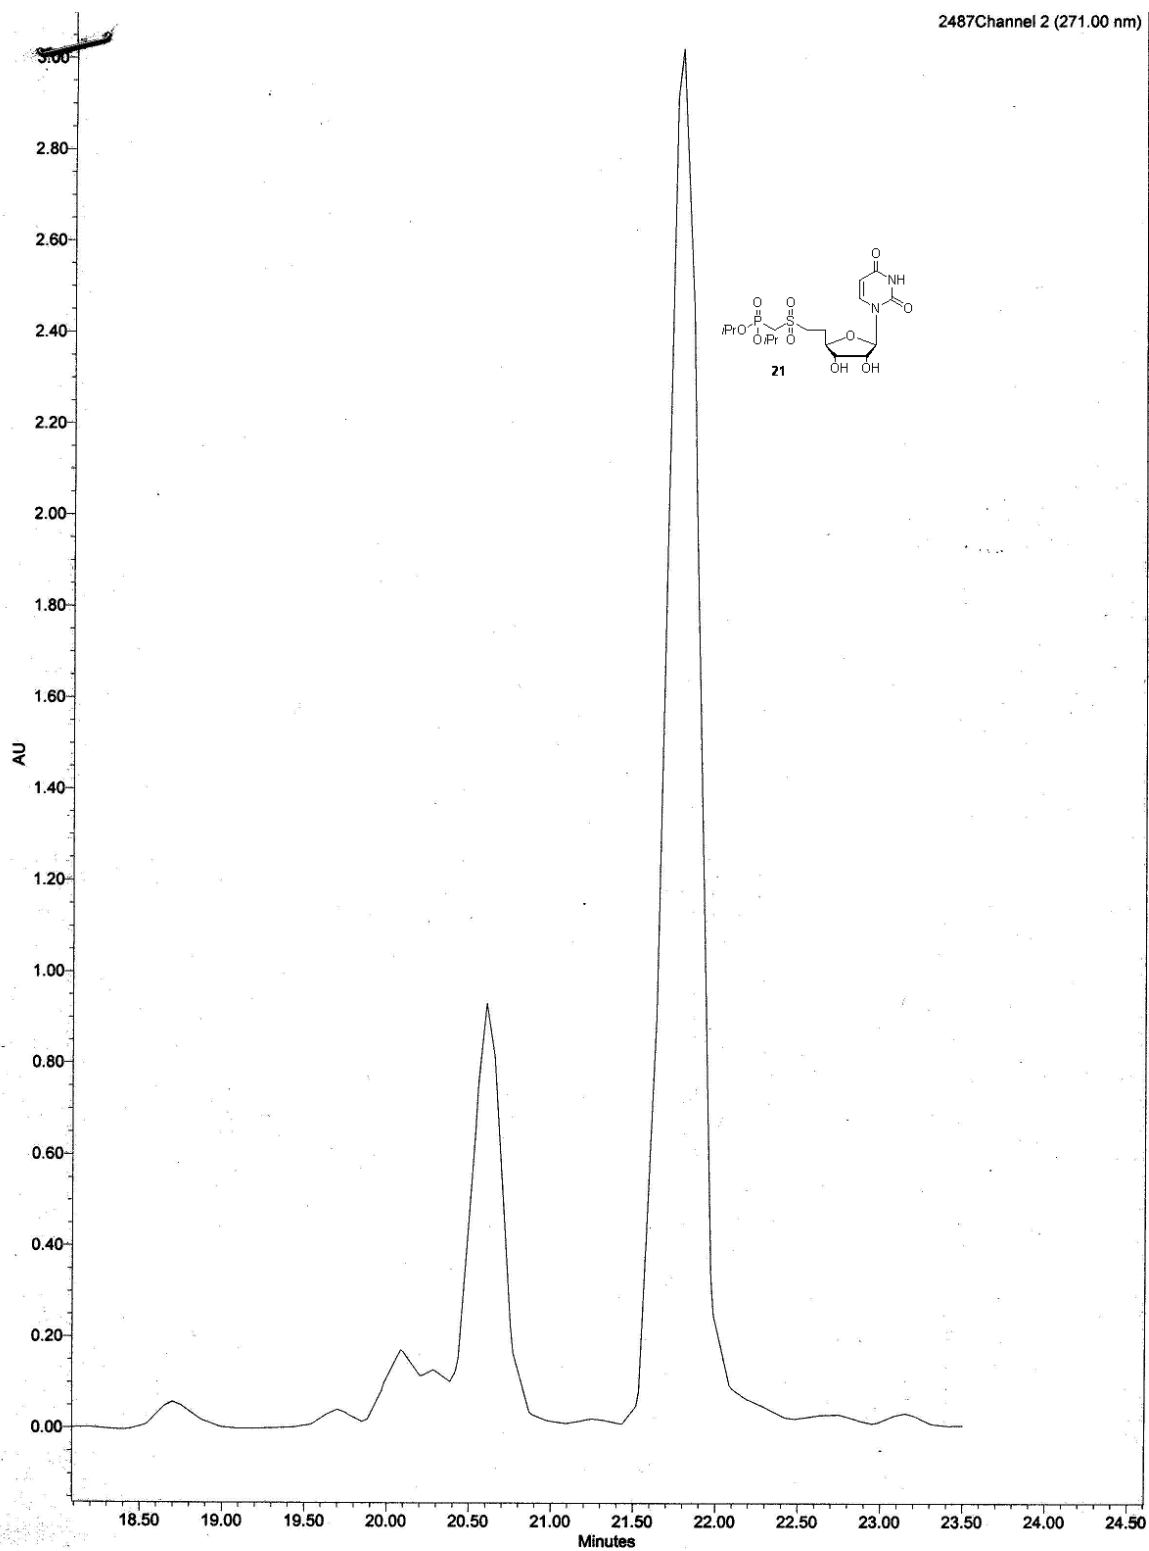

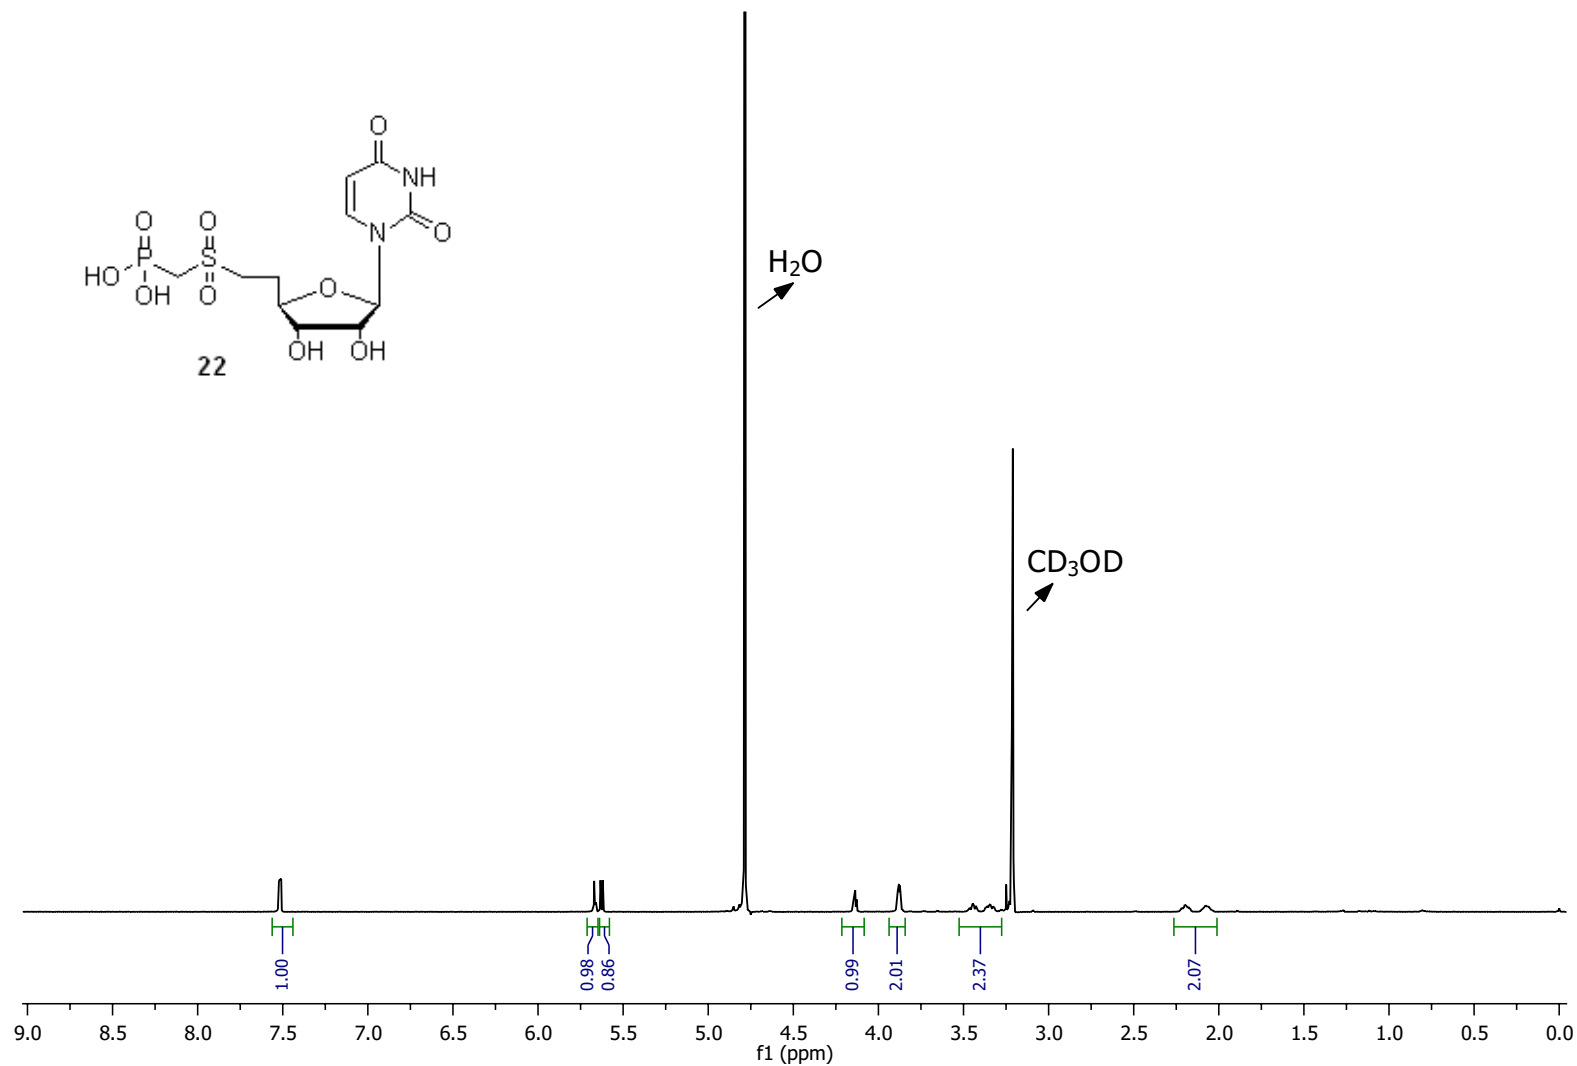

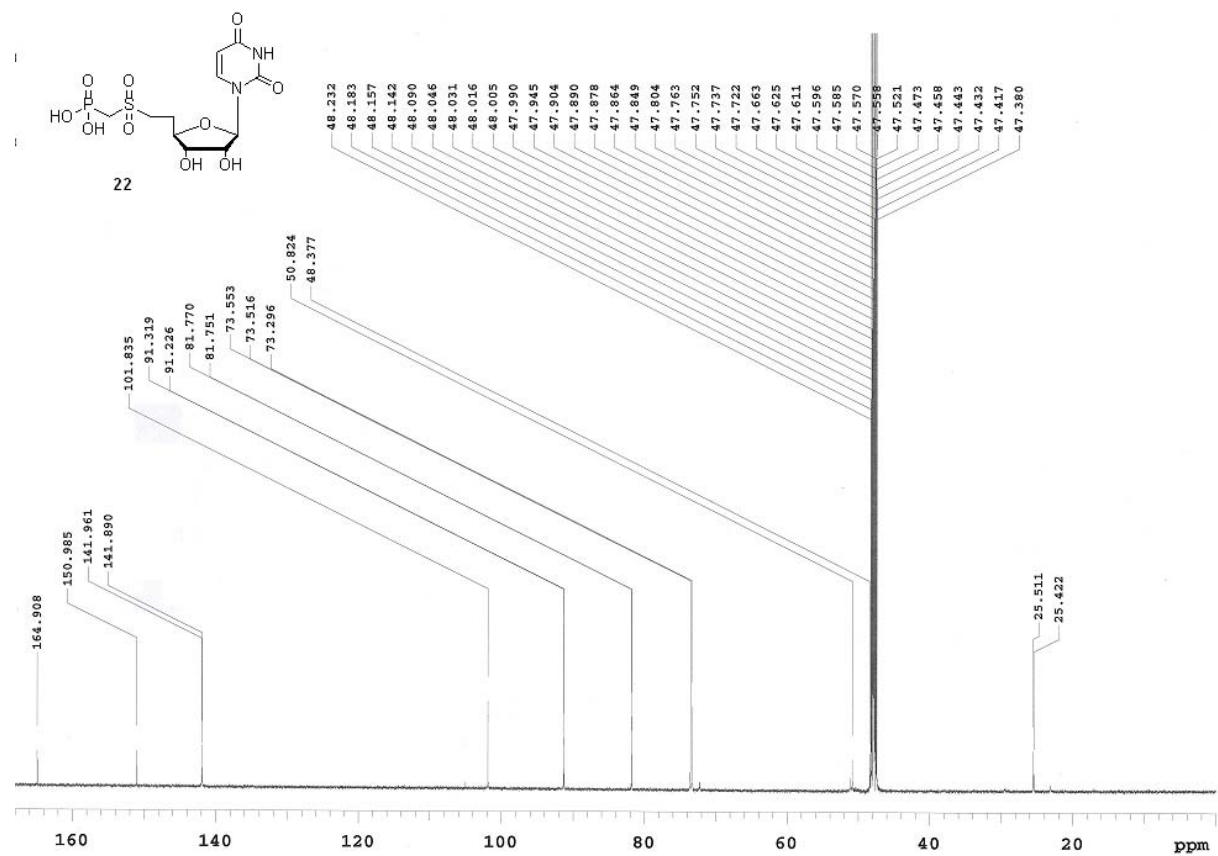



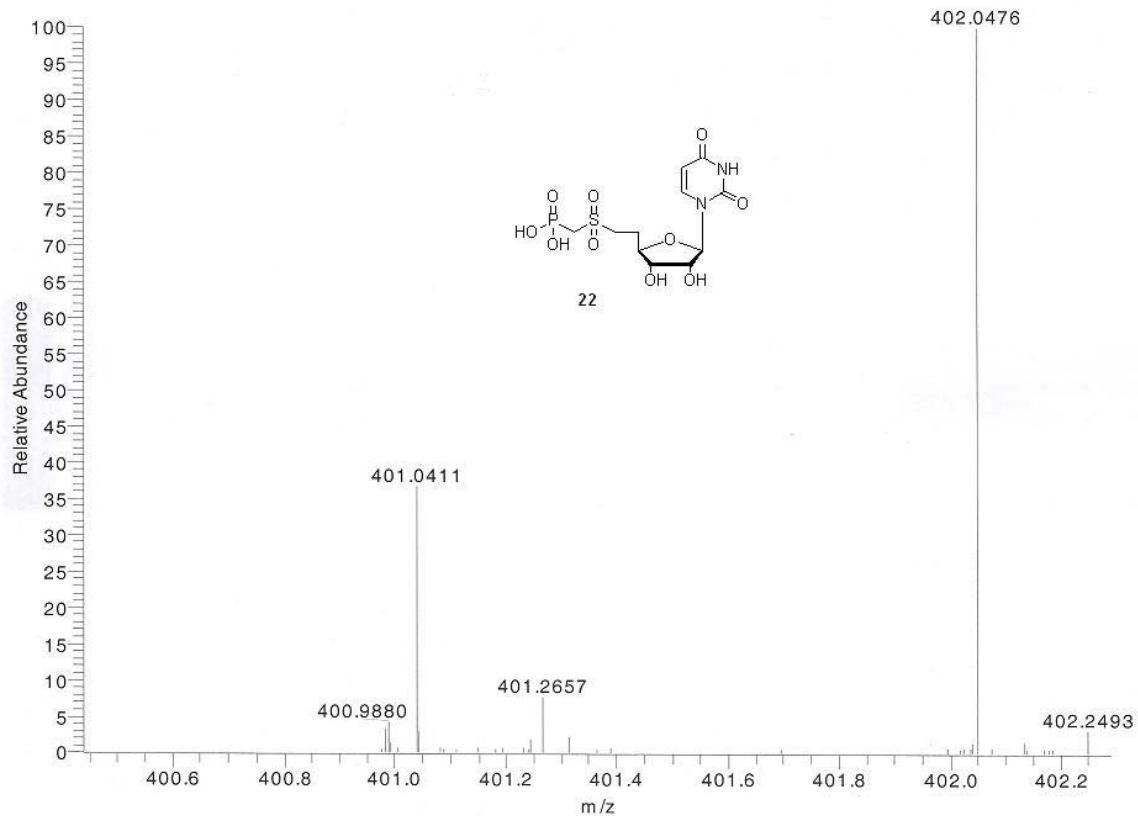

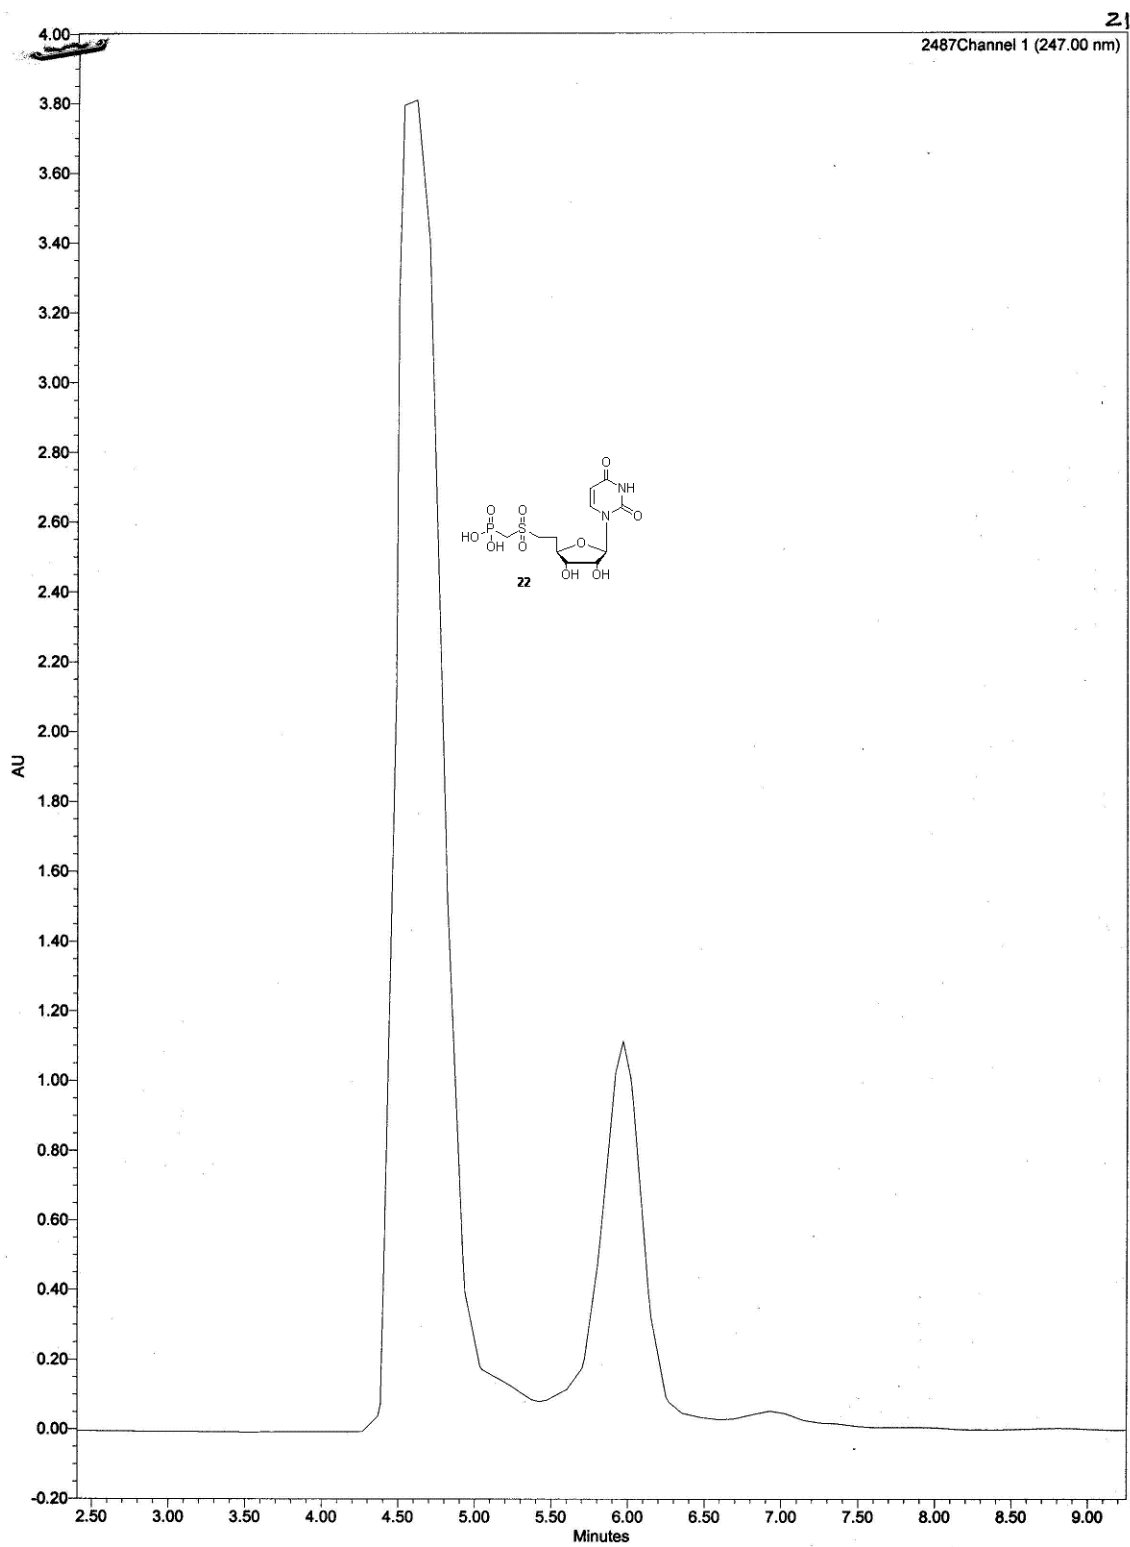

CTP at 1 mM

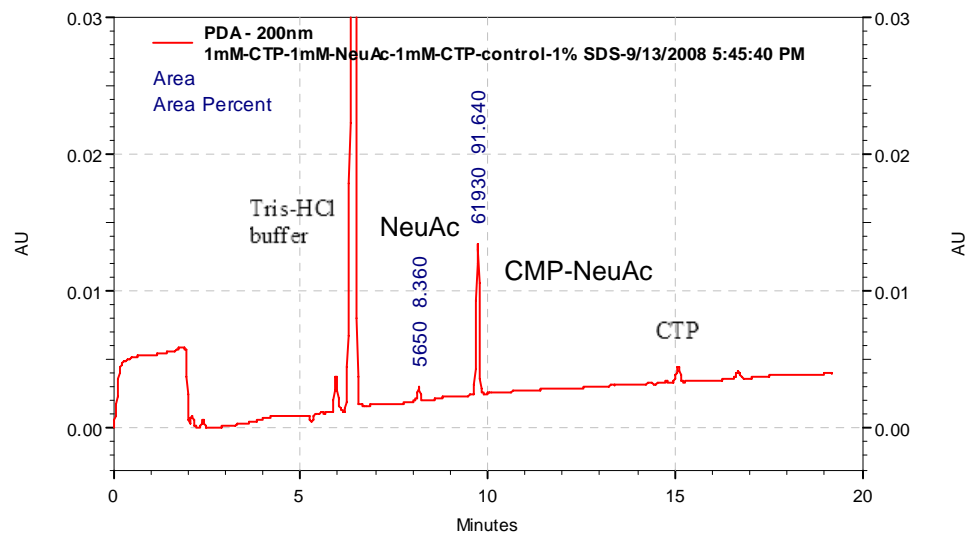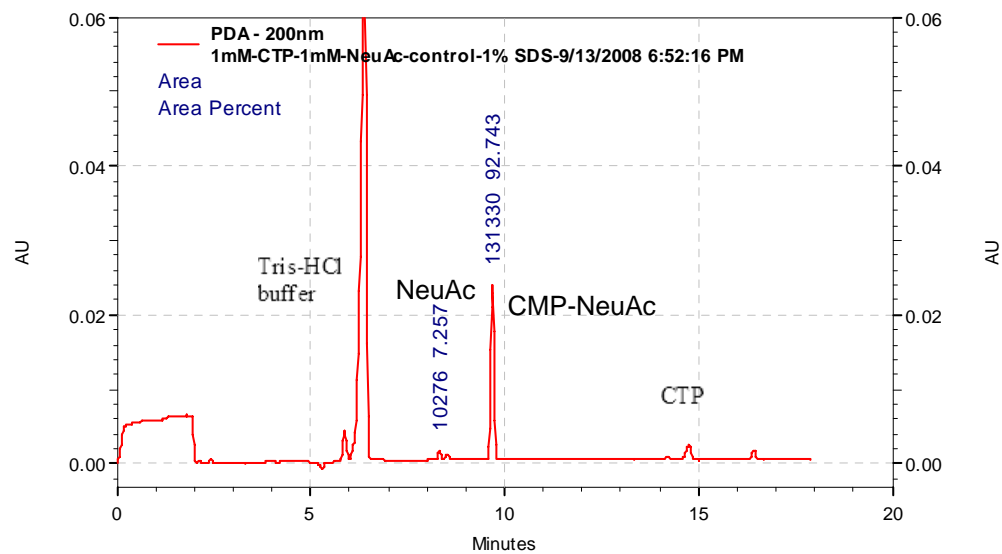

UTP at 1 mM

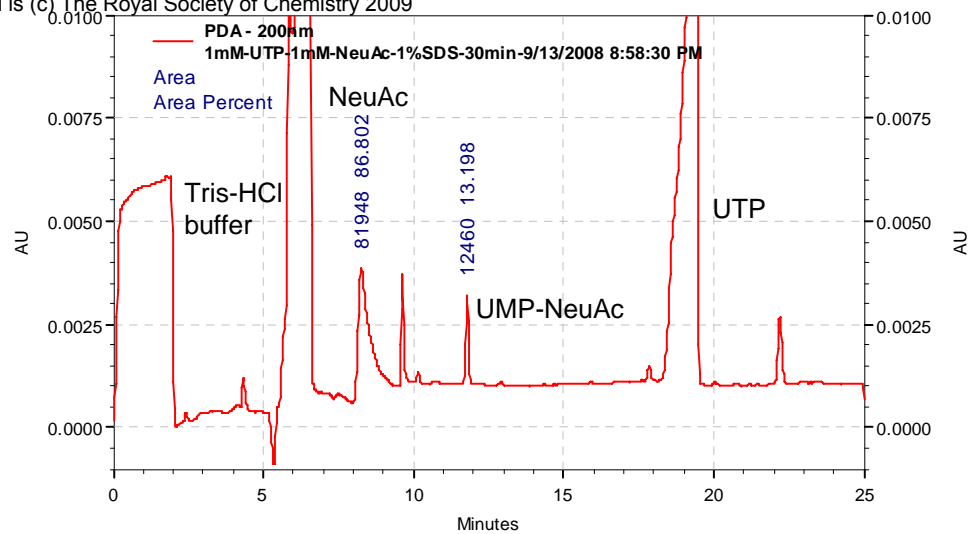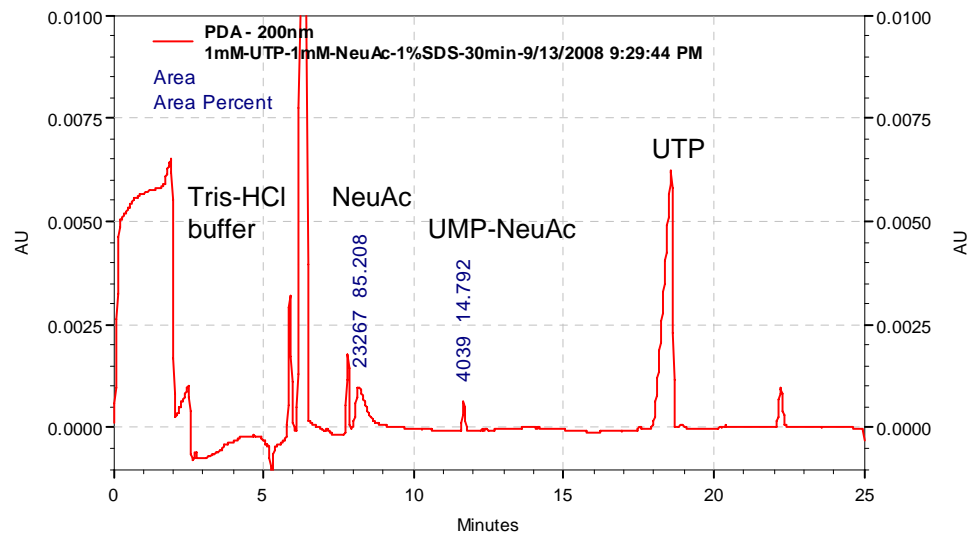

CDP at 1 mM

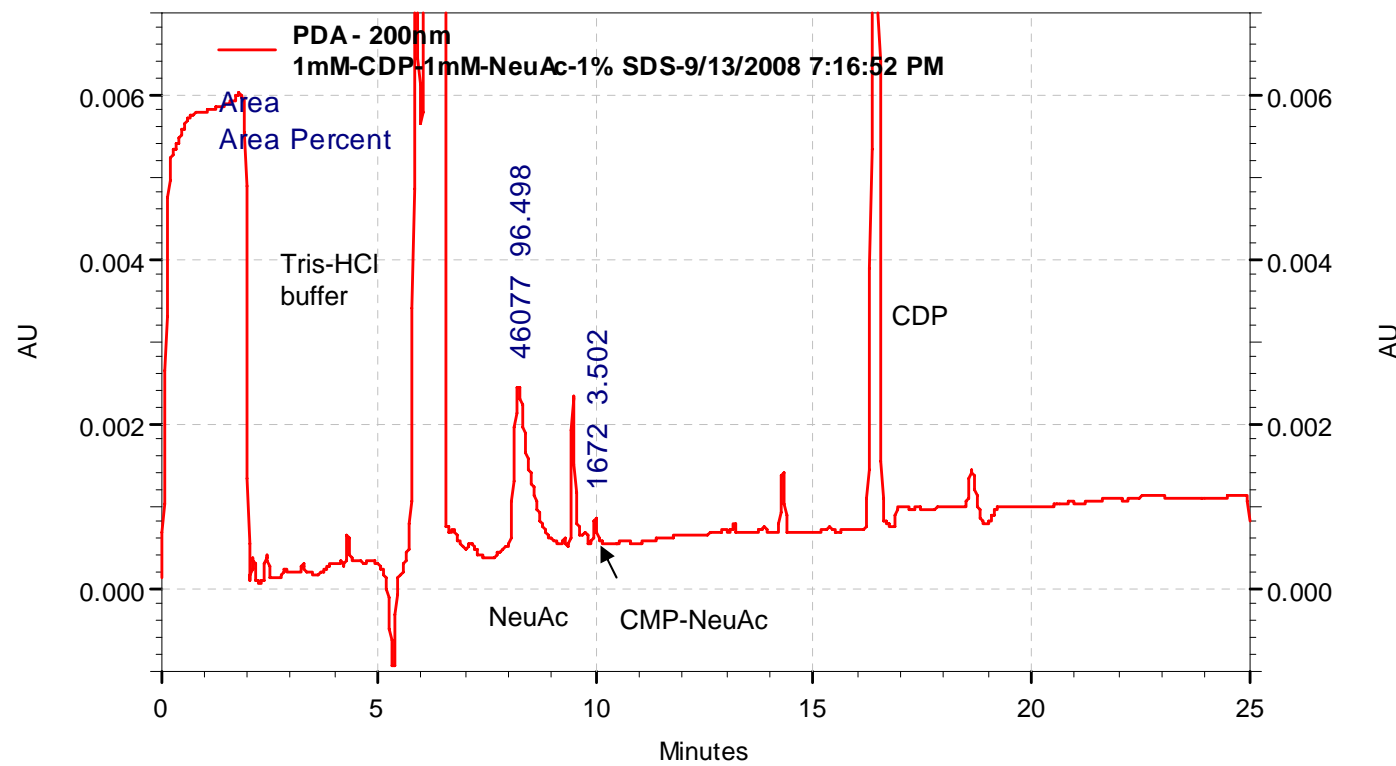

UDP at 1 mM

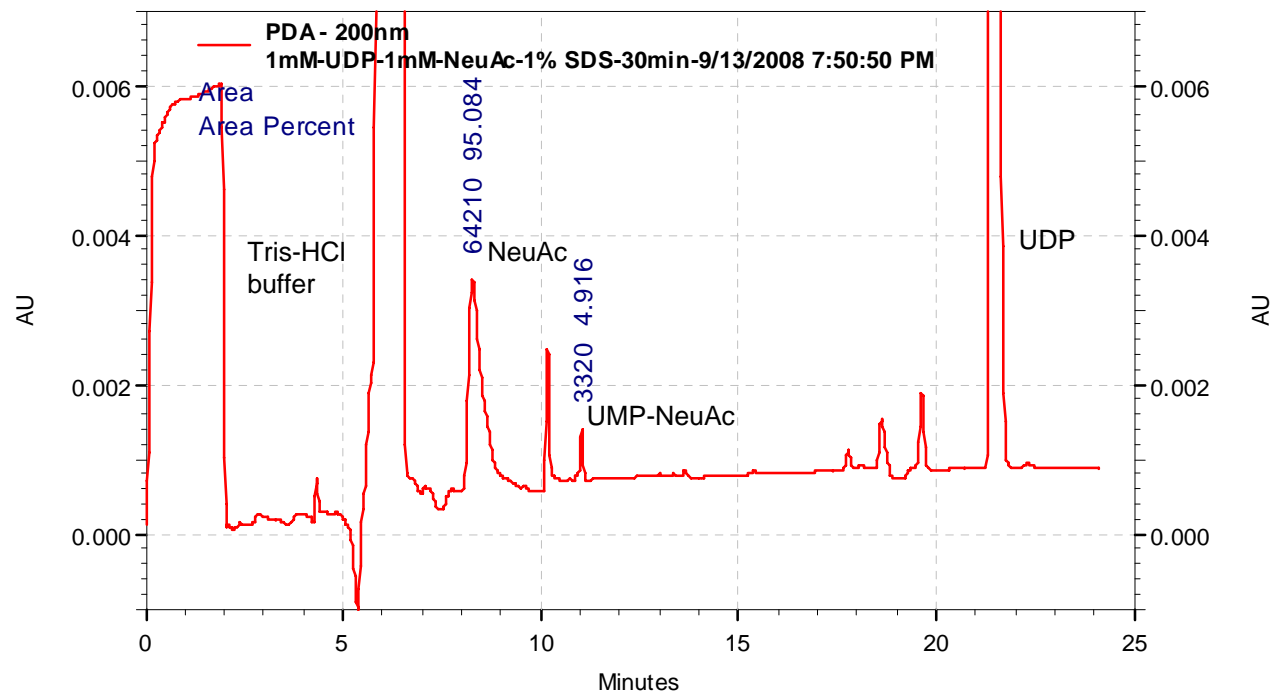

# CTP at 5 mM

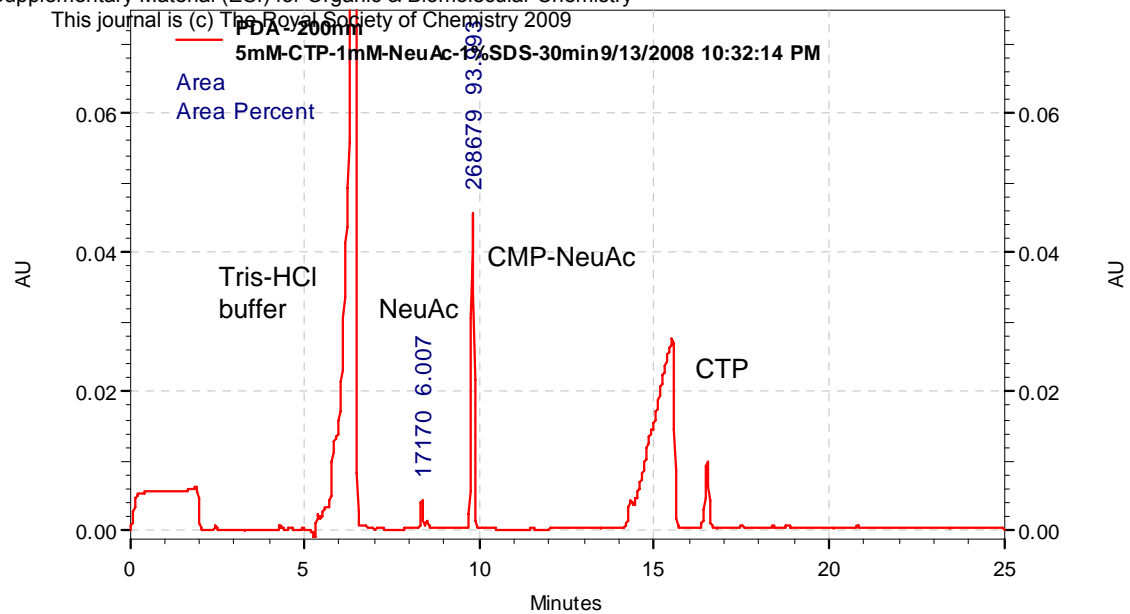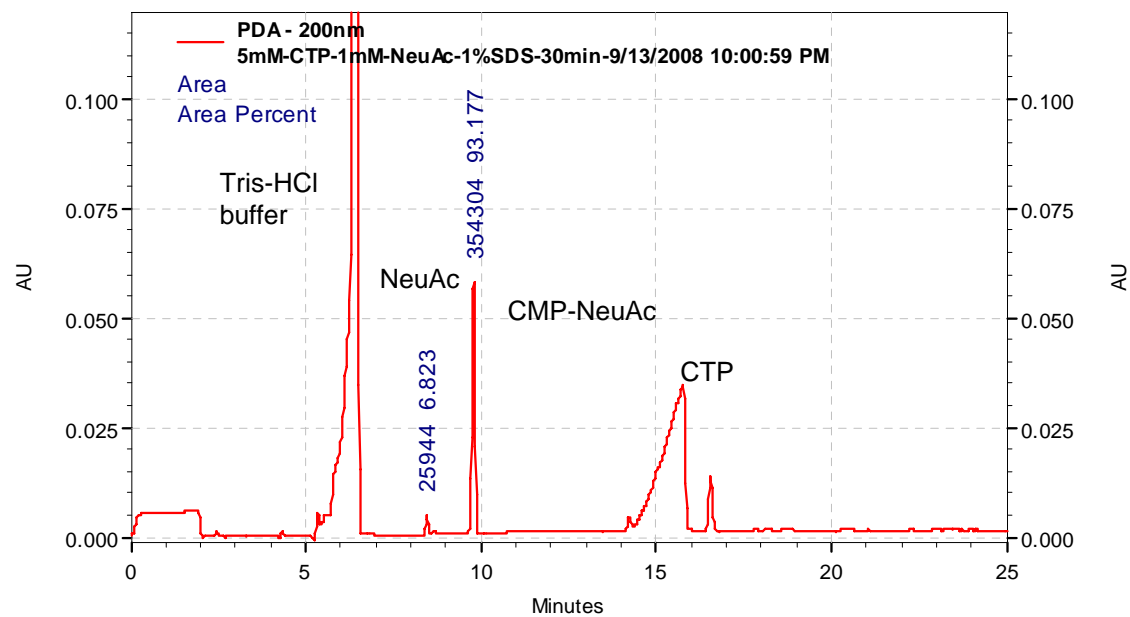

# UTP at 5 mM

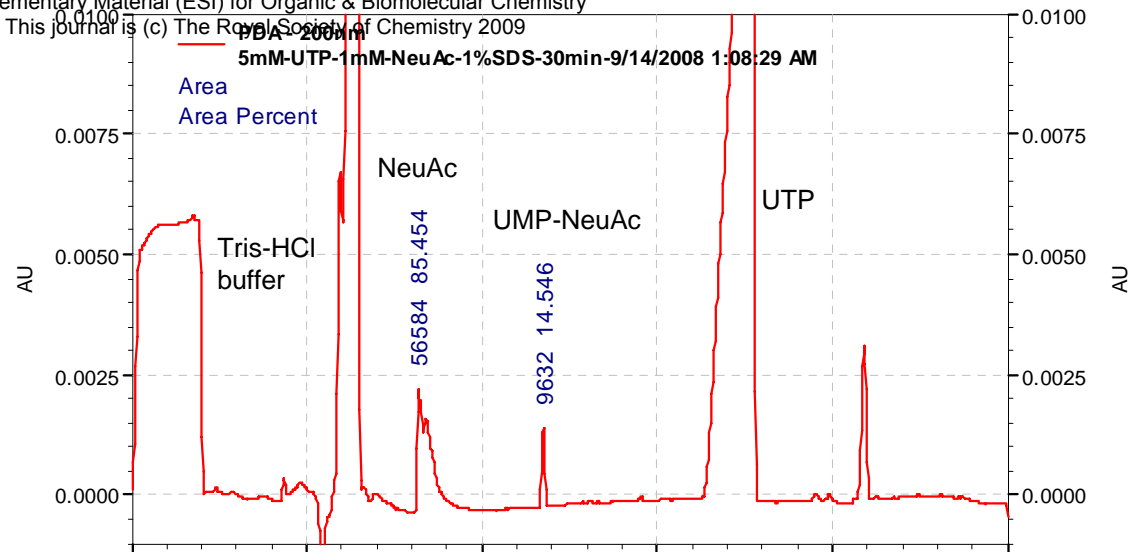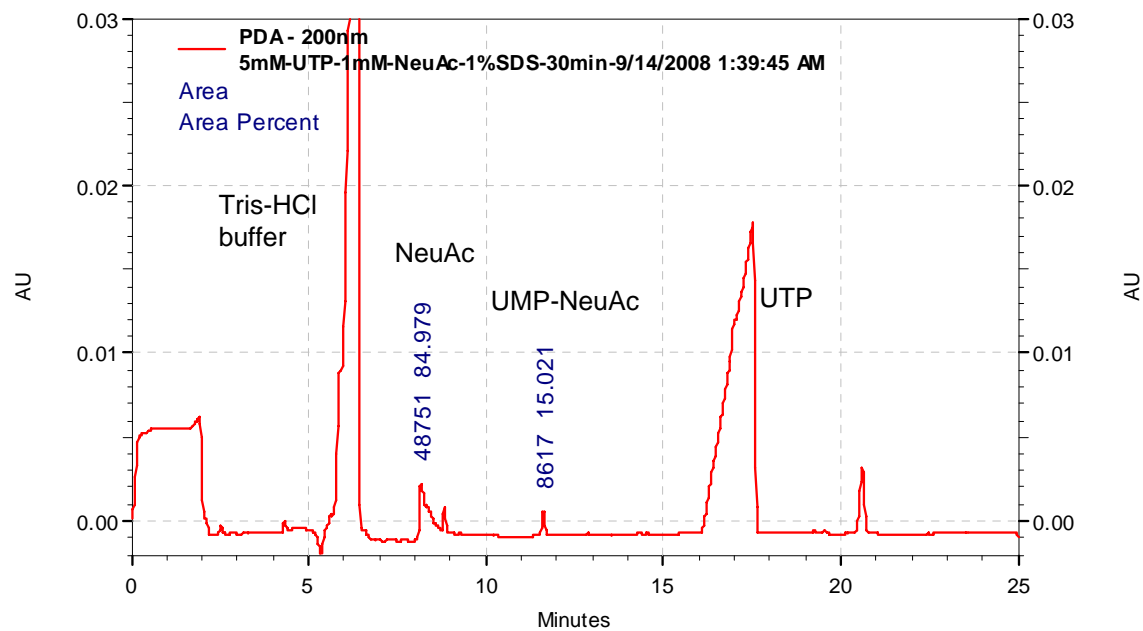



# CDP at 5 mM

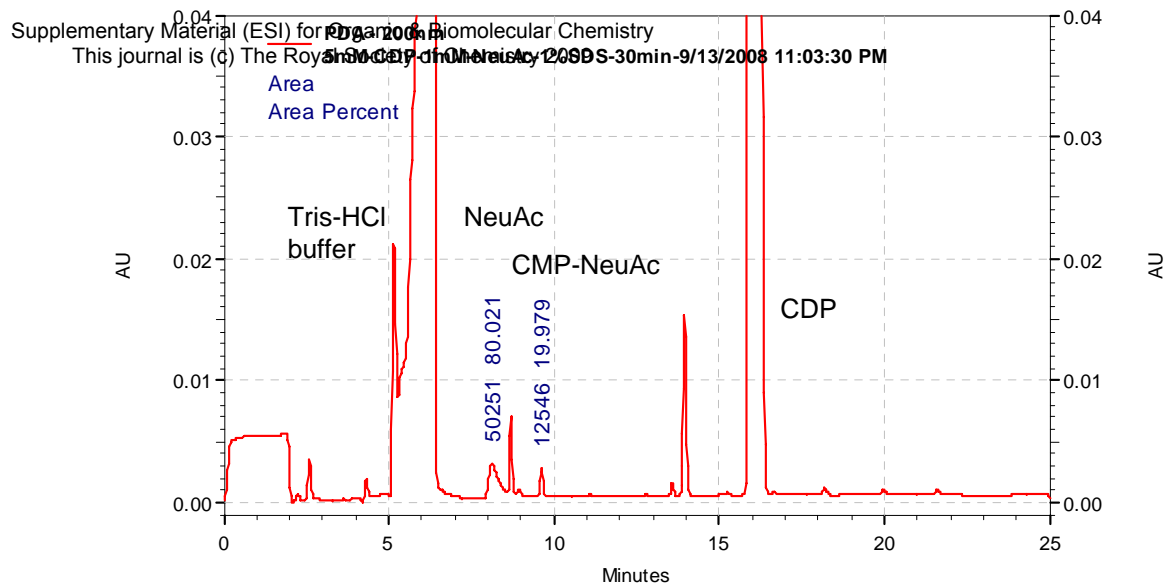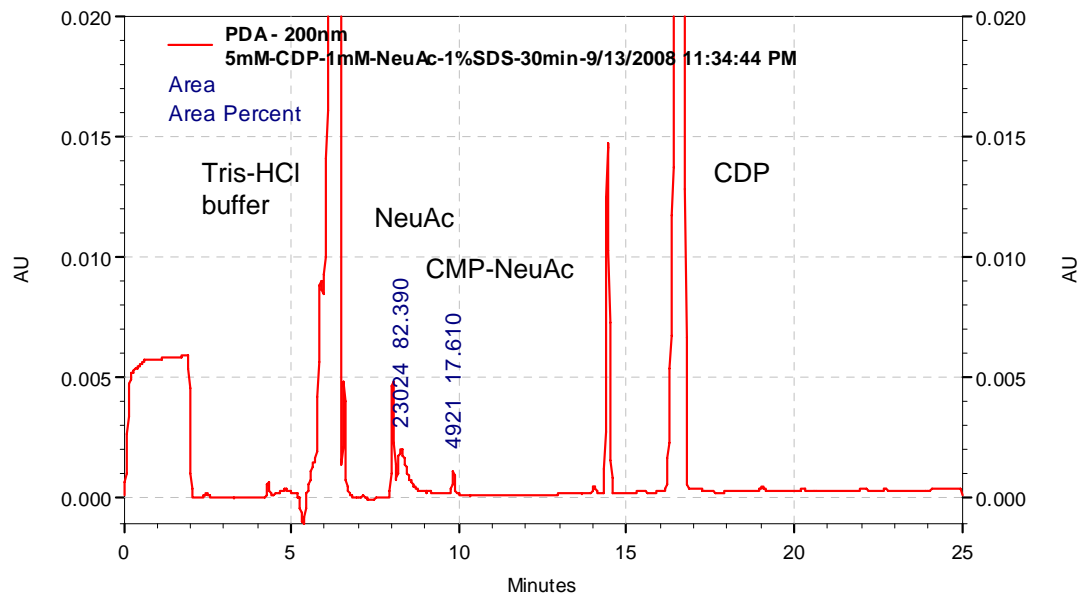

## UDP at 5 mM

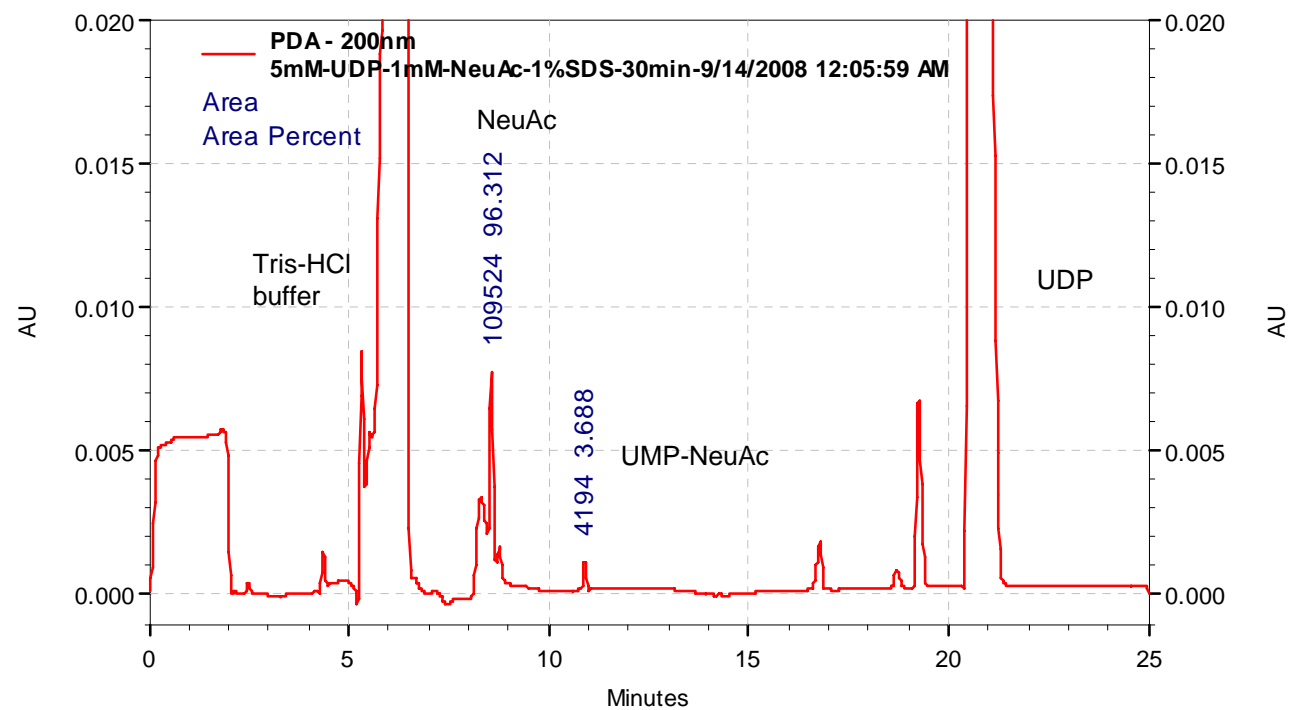

# CTP at 10 mM

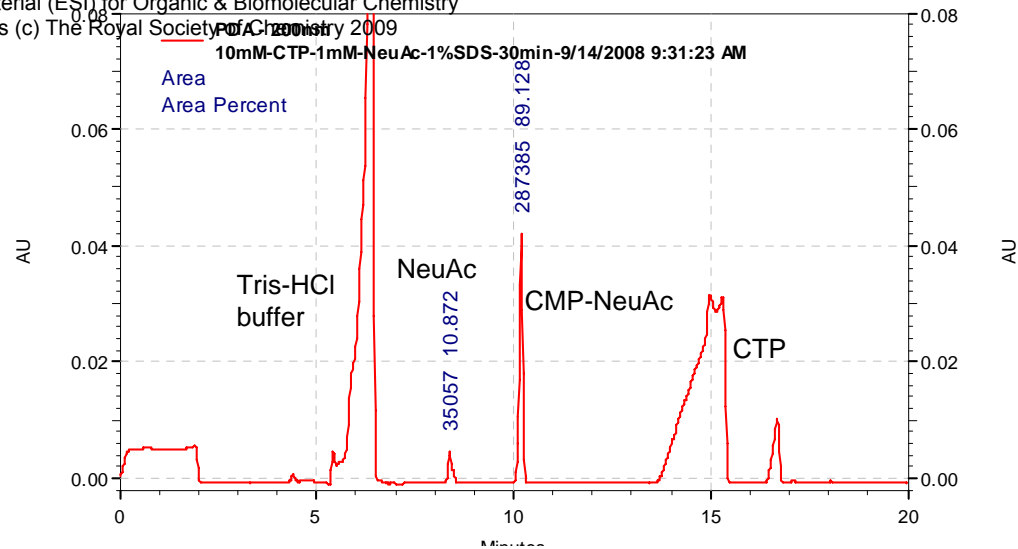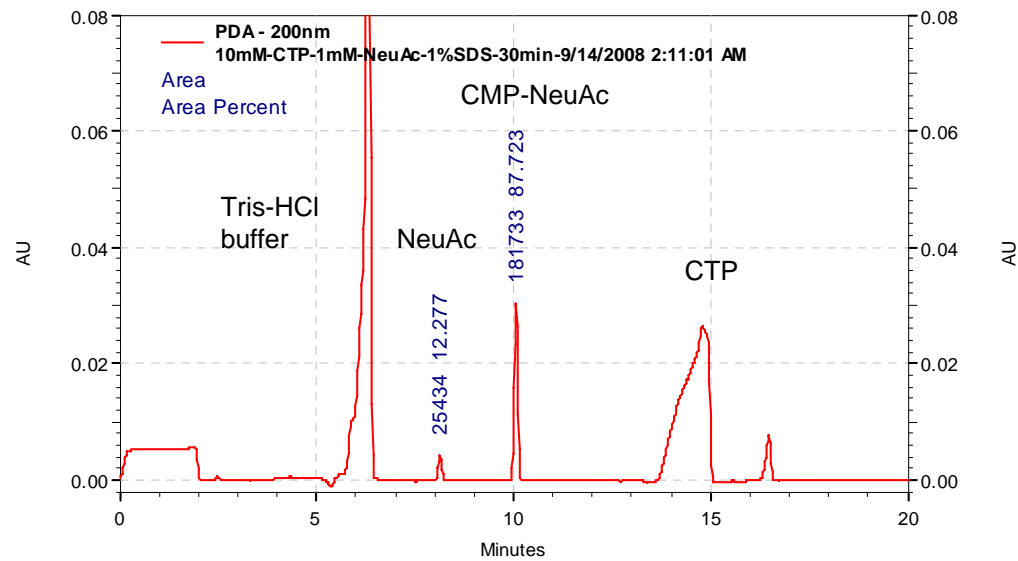

# UTP at 10 mM

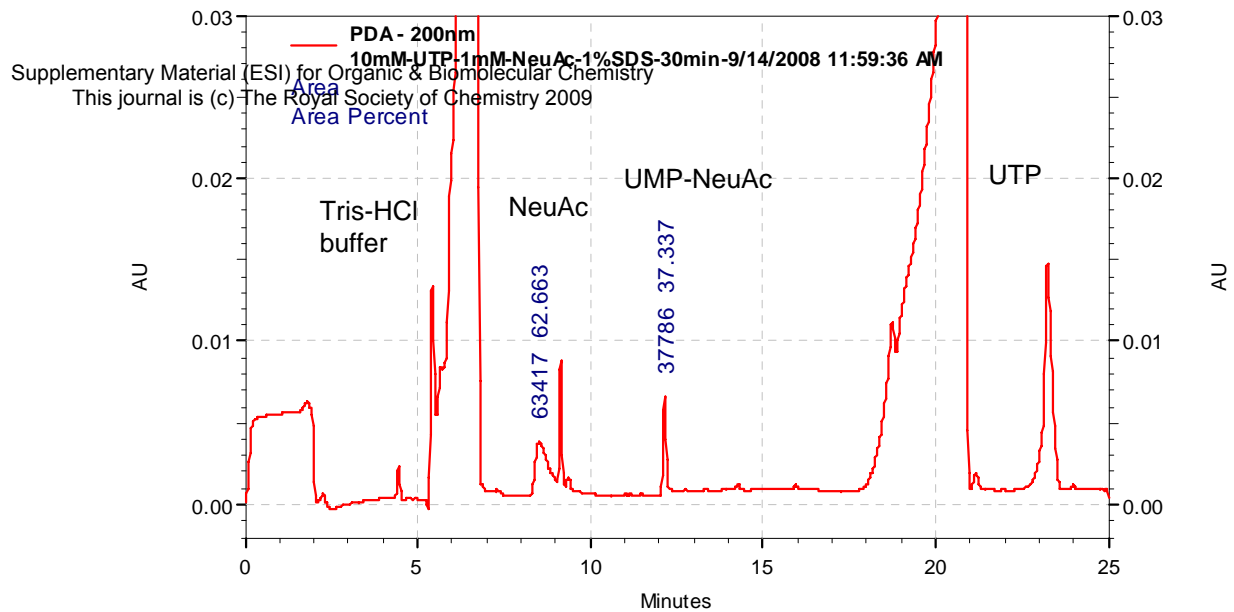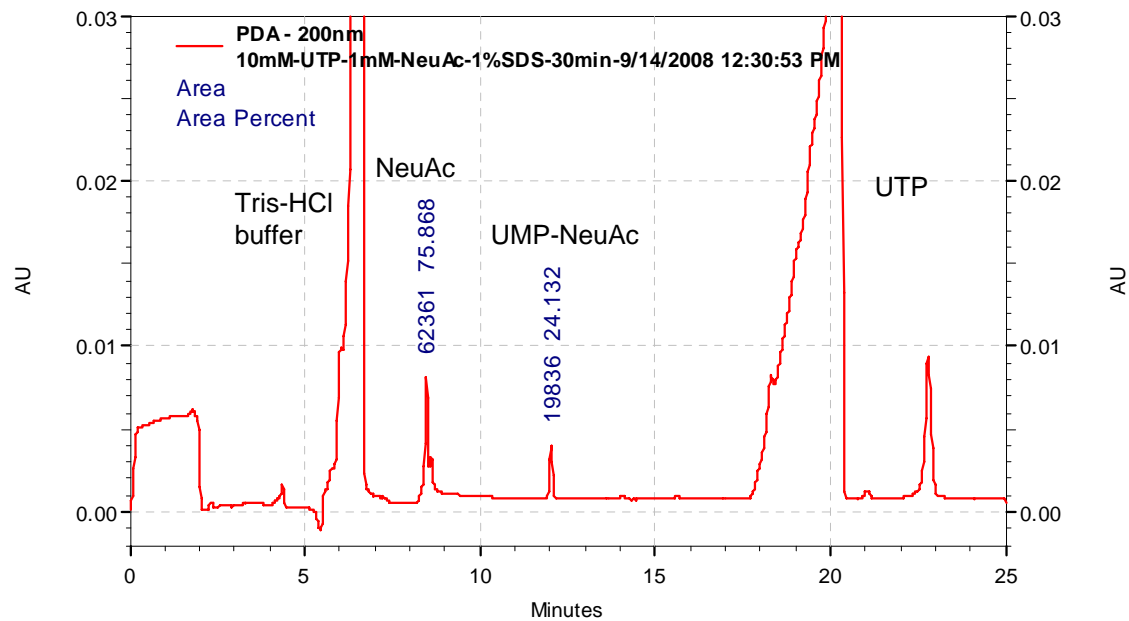

# CDP at 10 mM

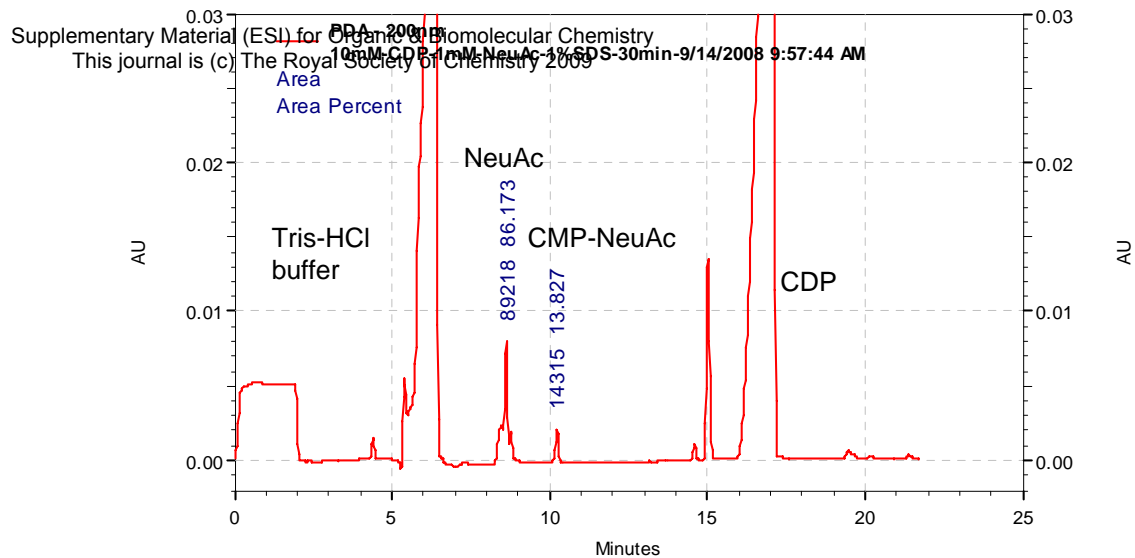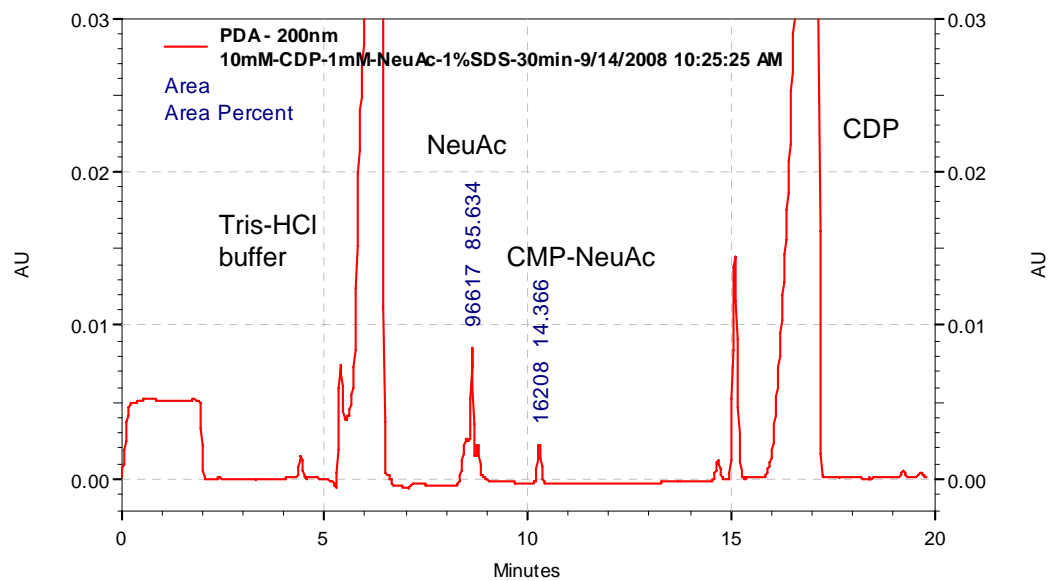

# Controls With no Inhibitors

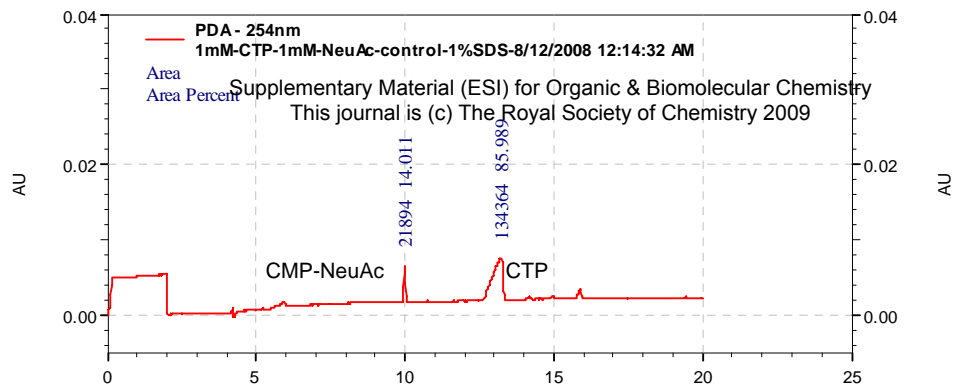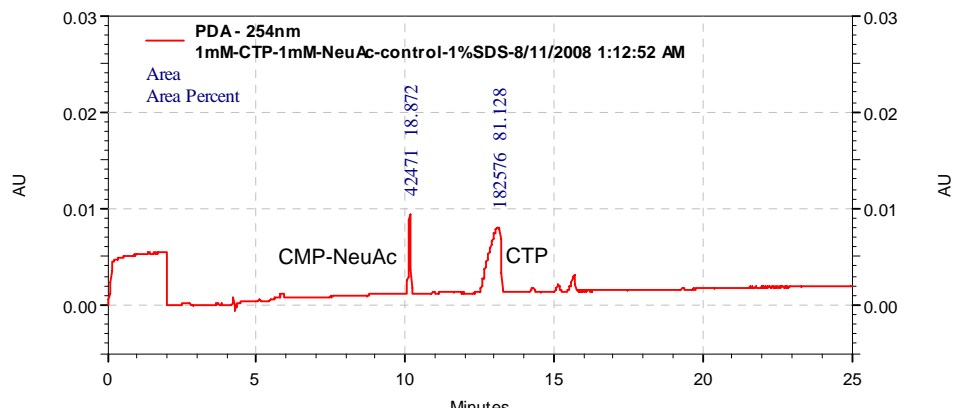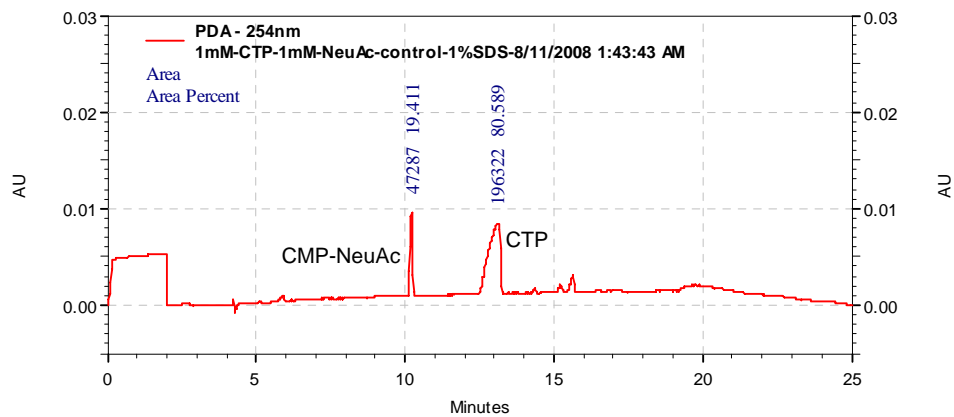

Controls  
With no  
Inhibitors

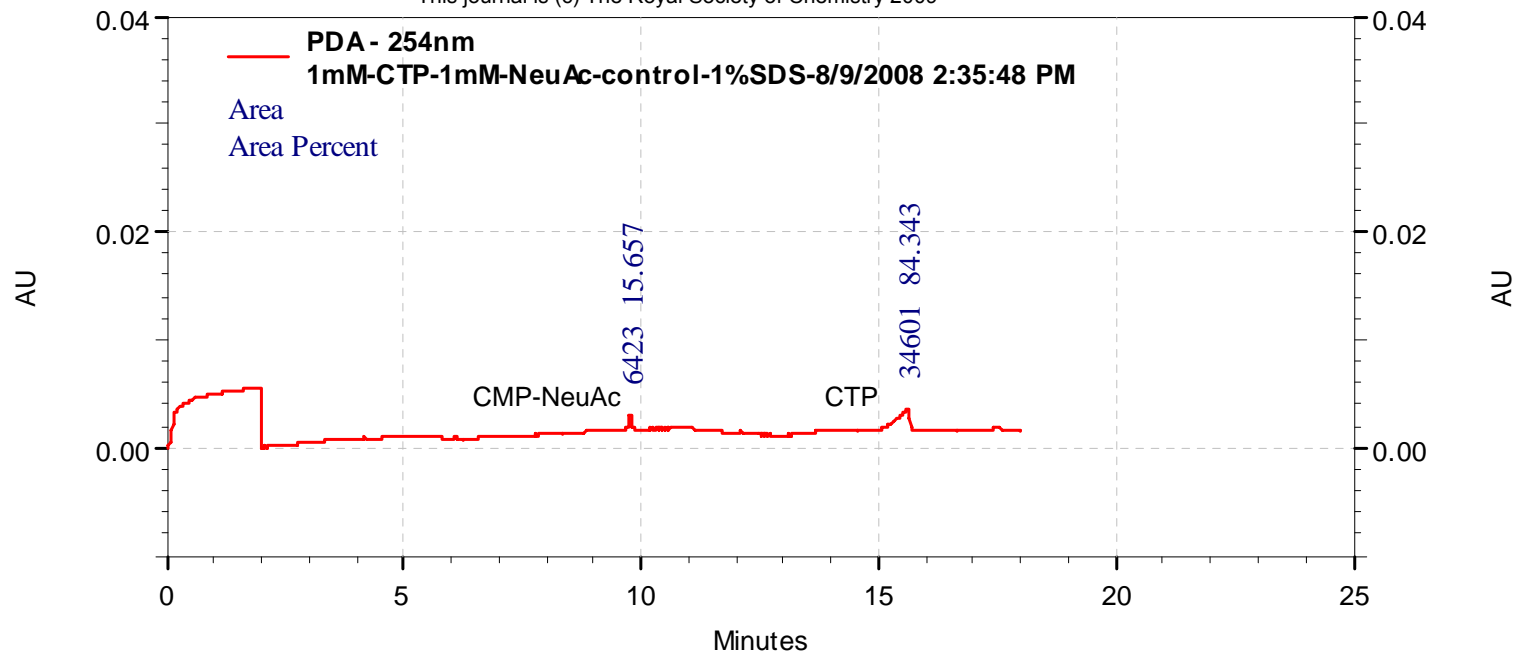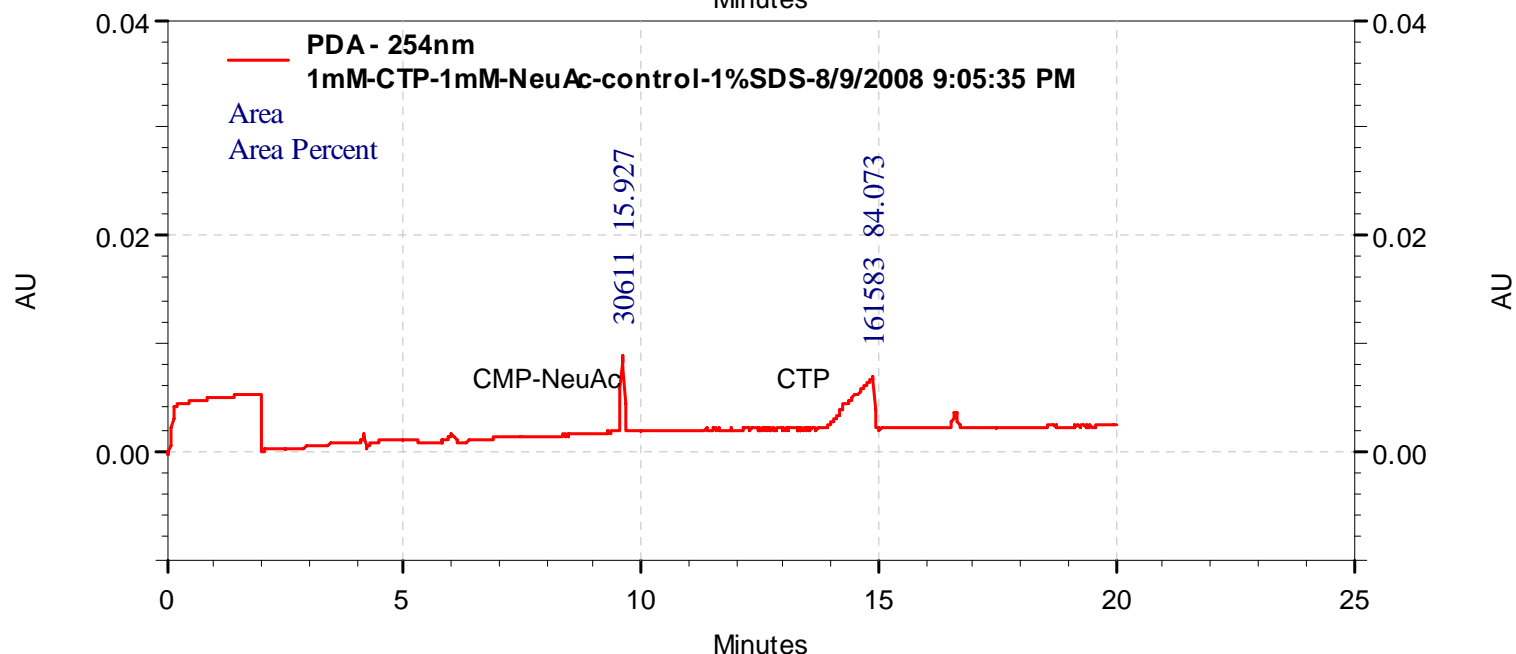

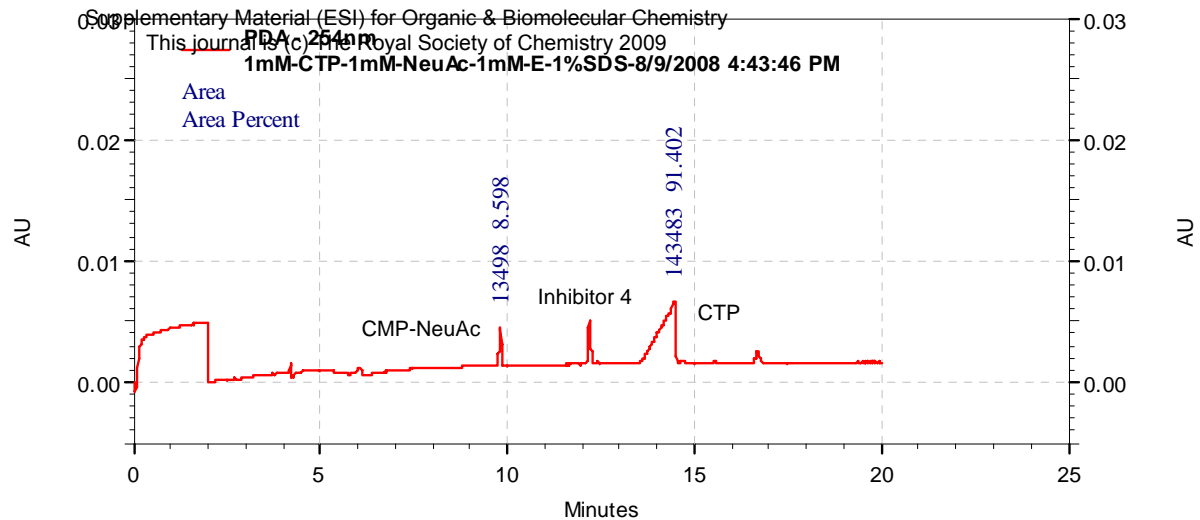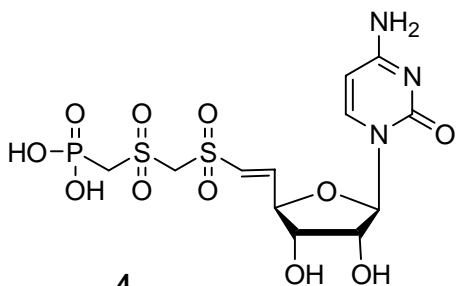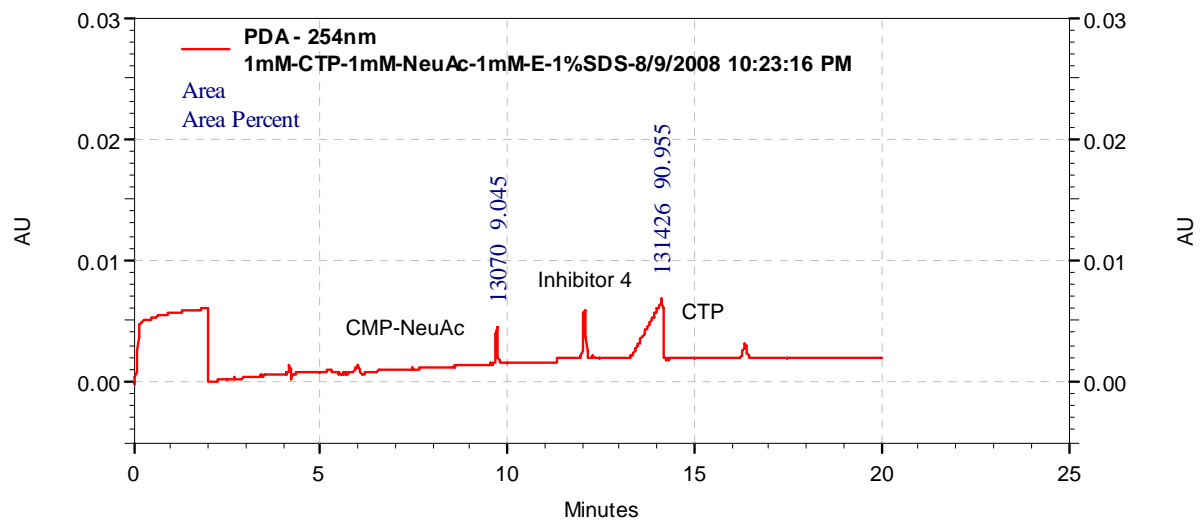



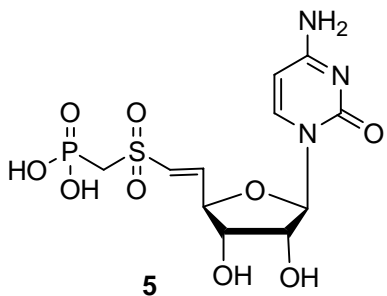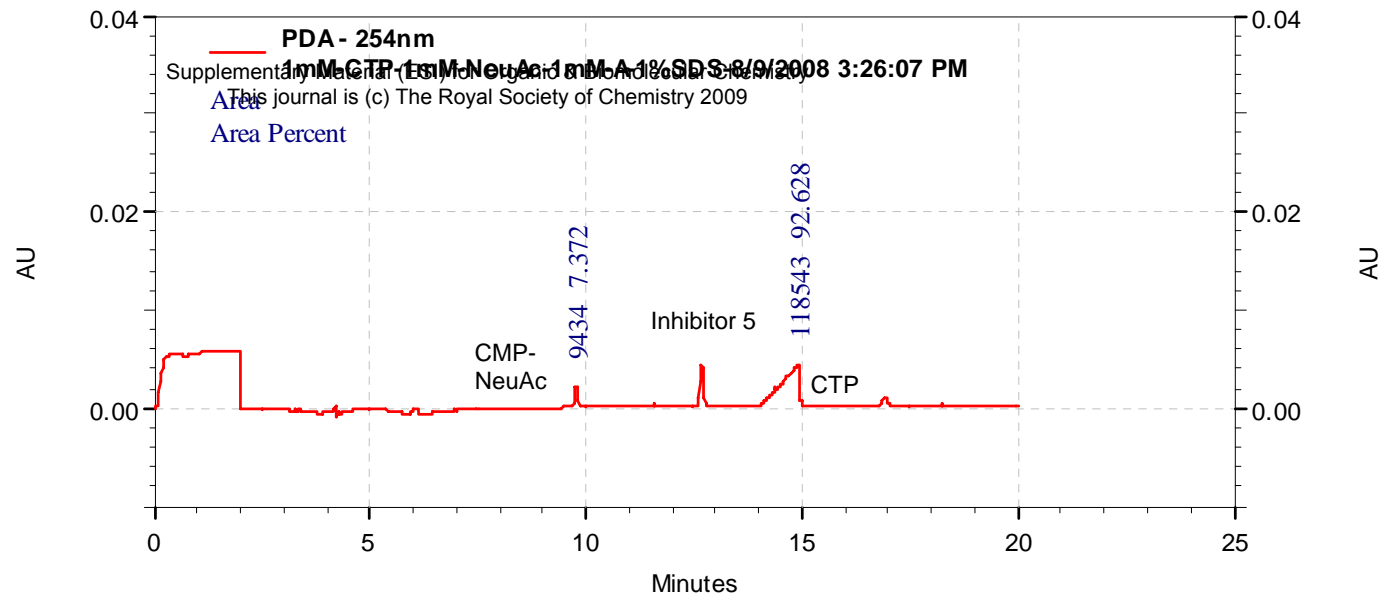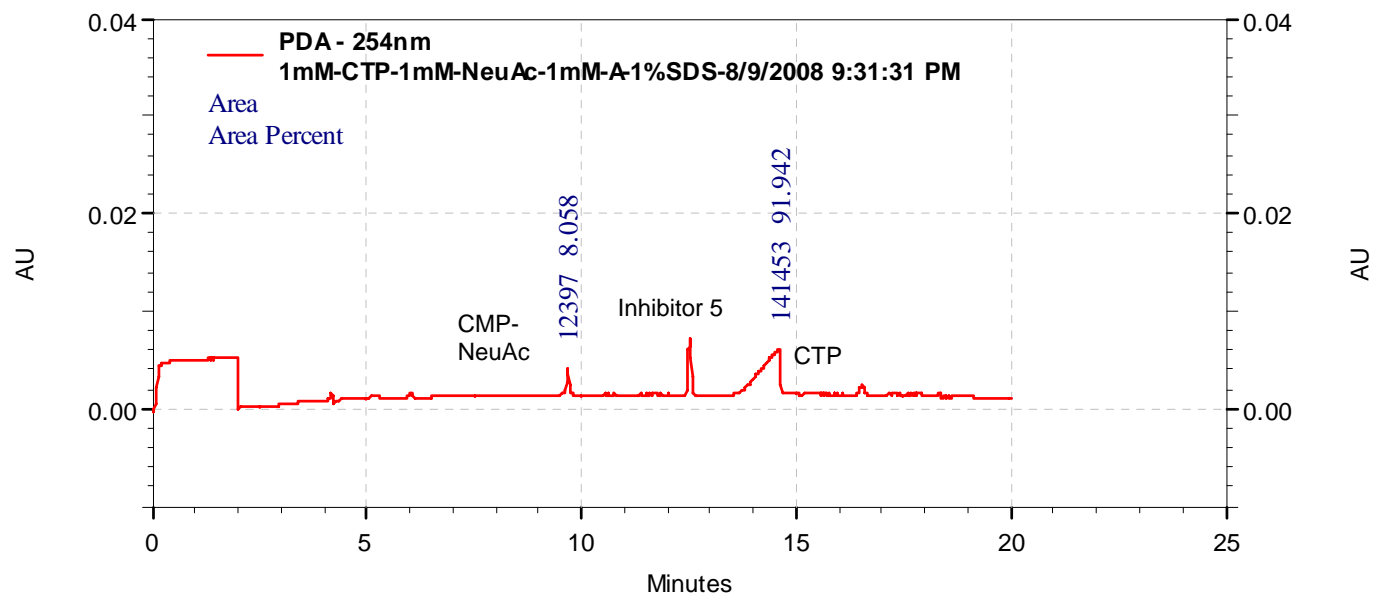

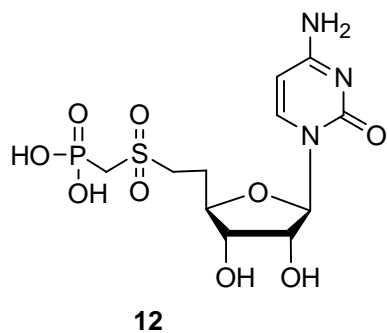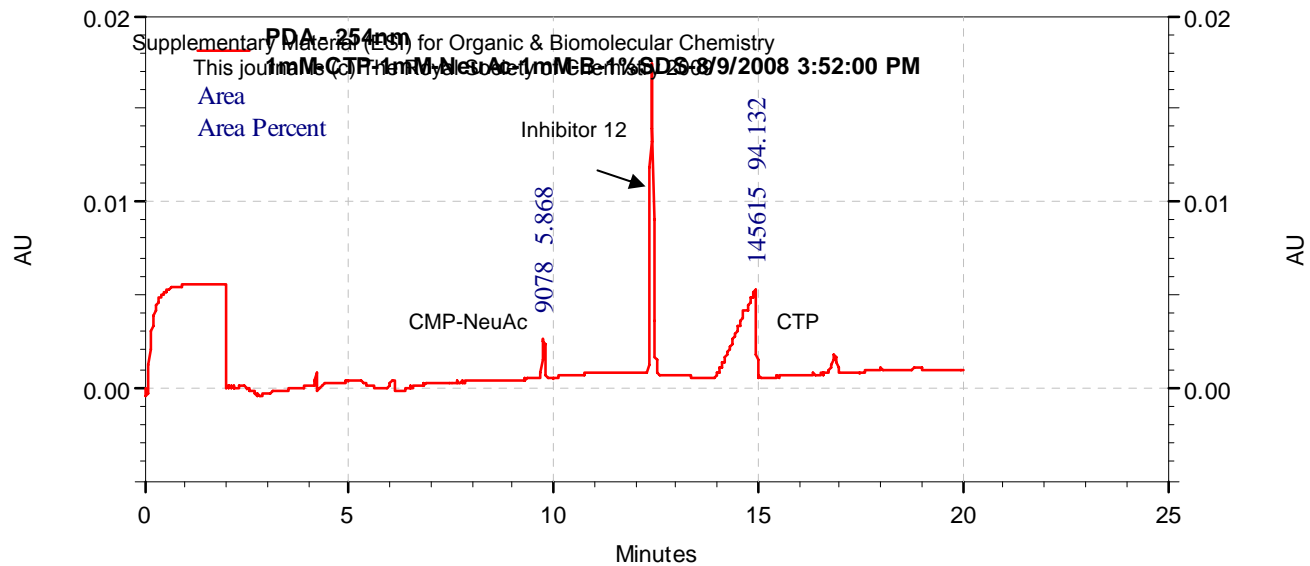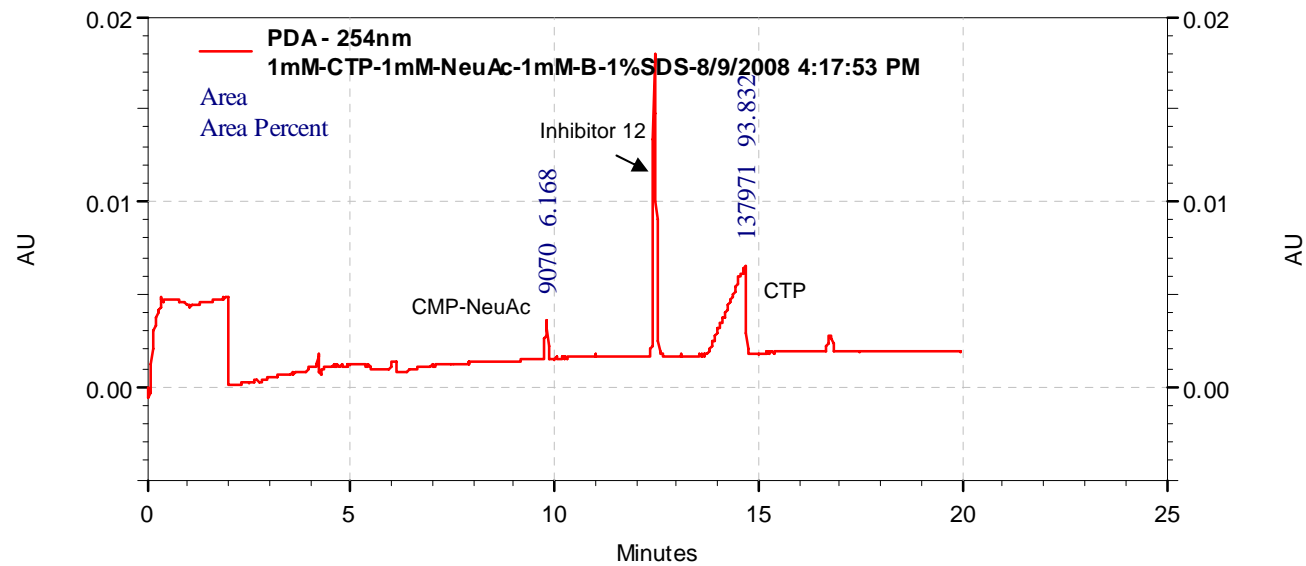

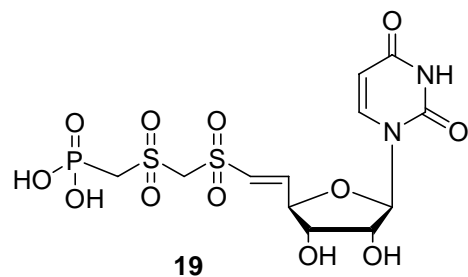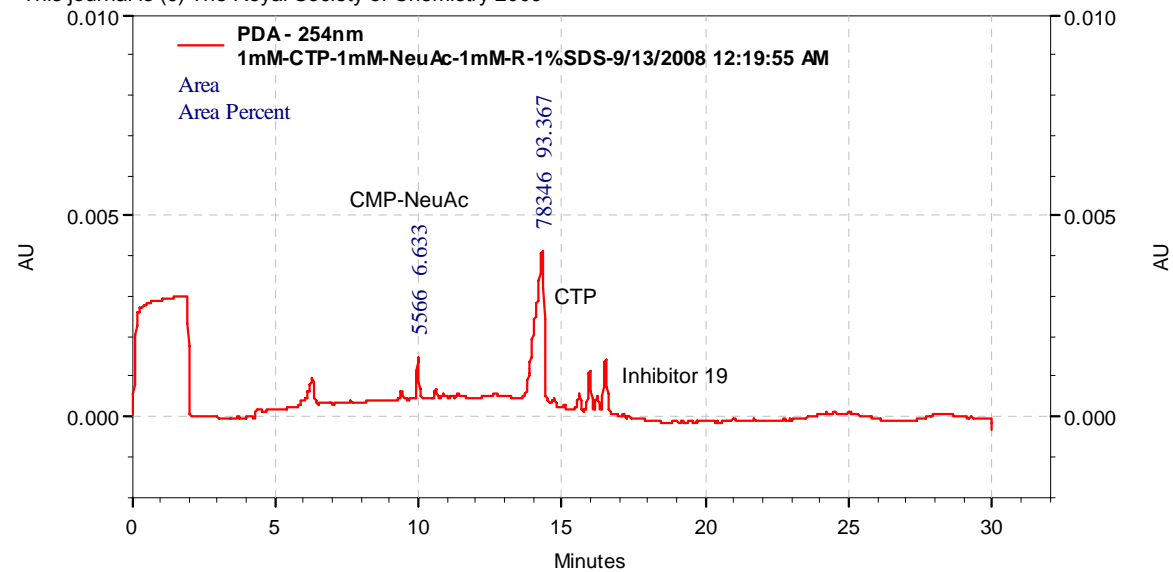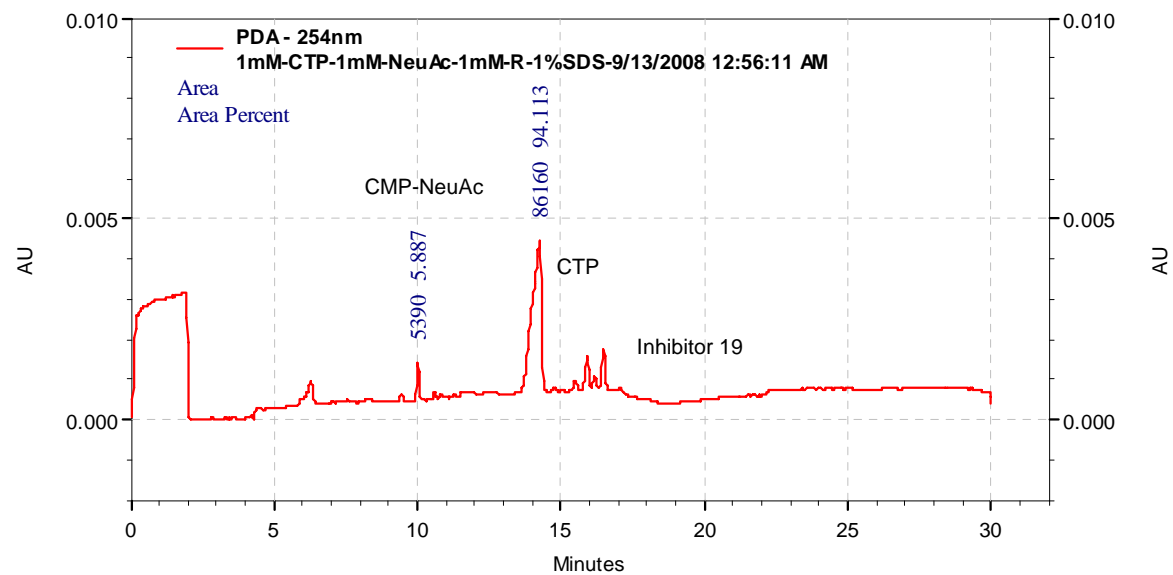

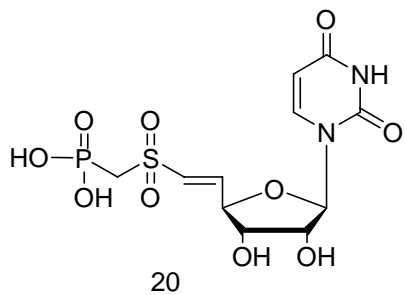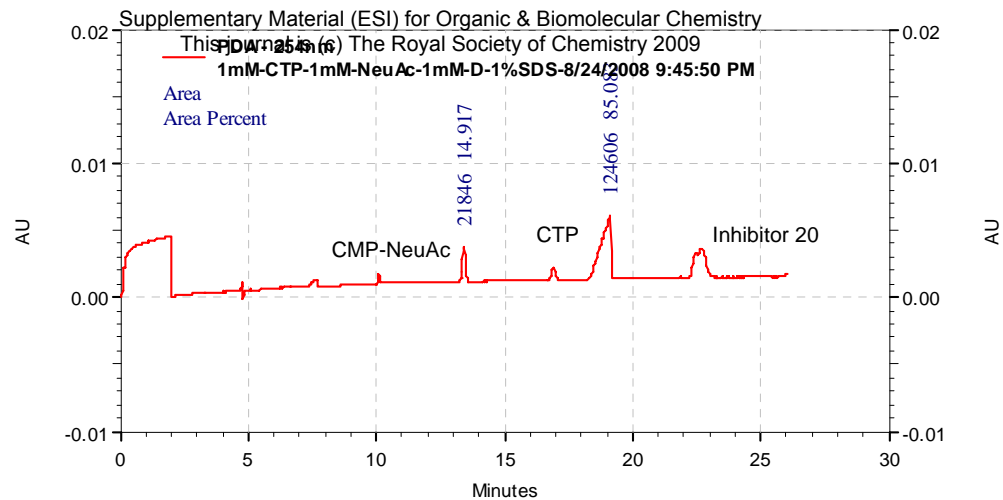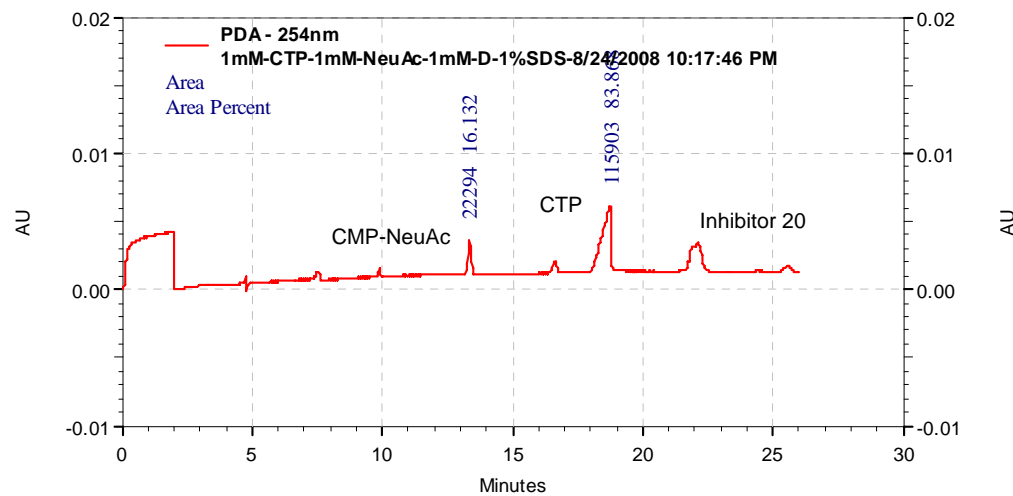

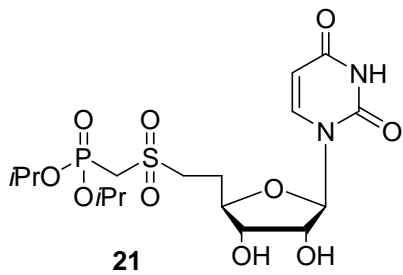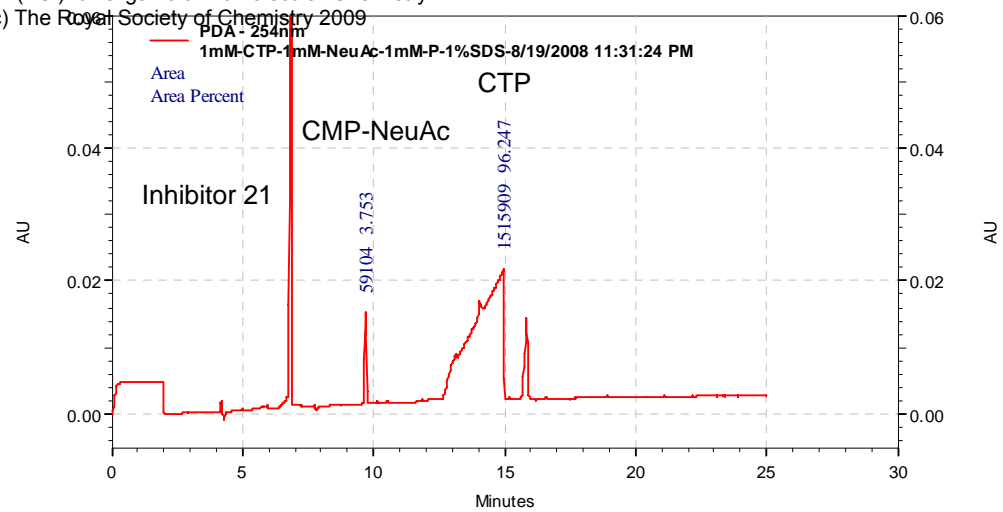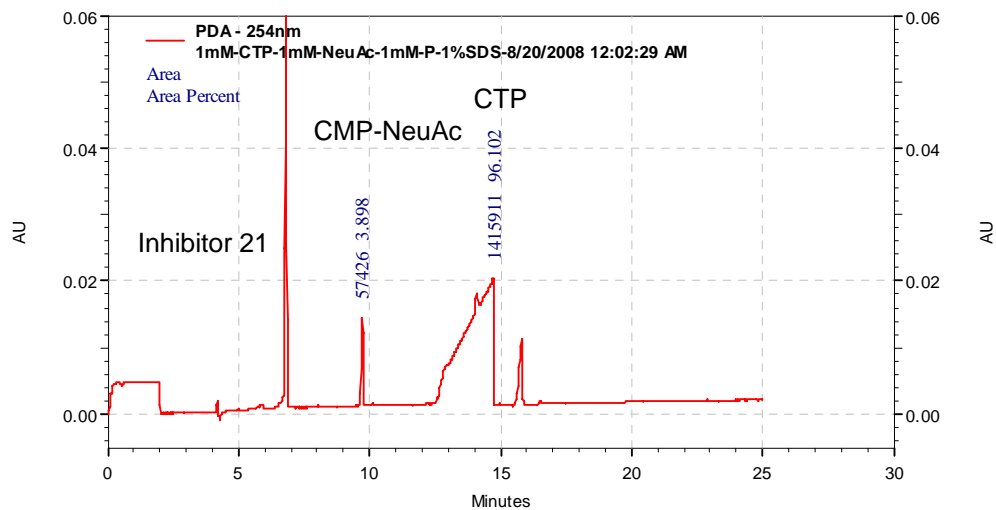

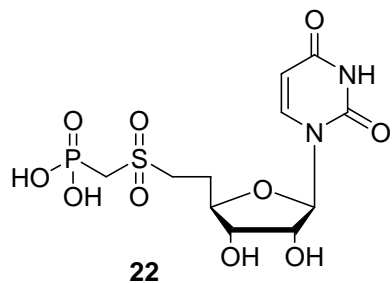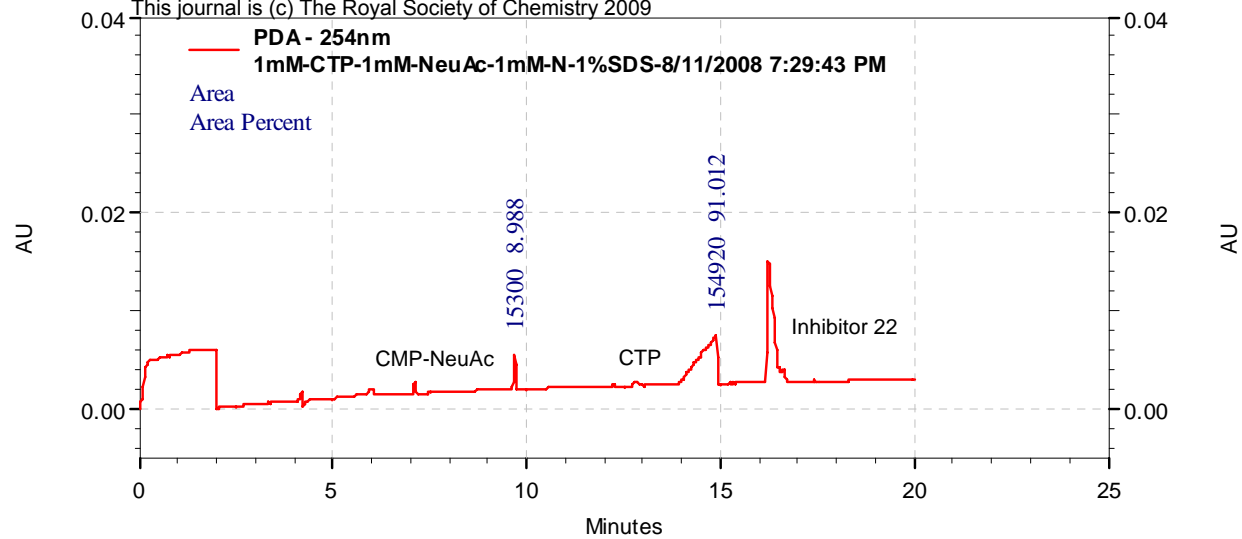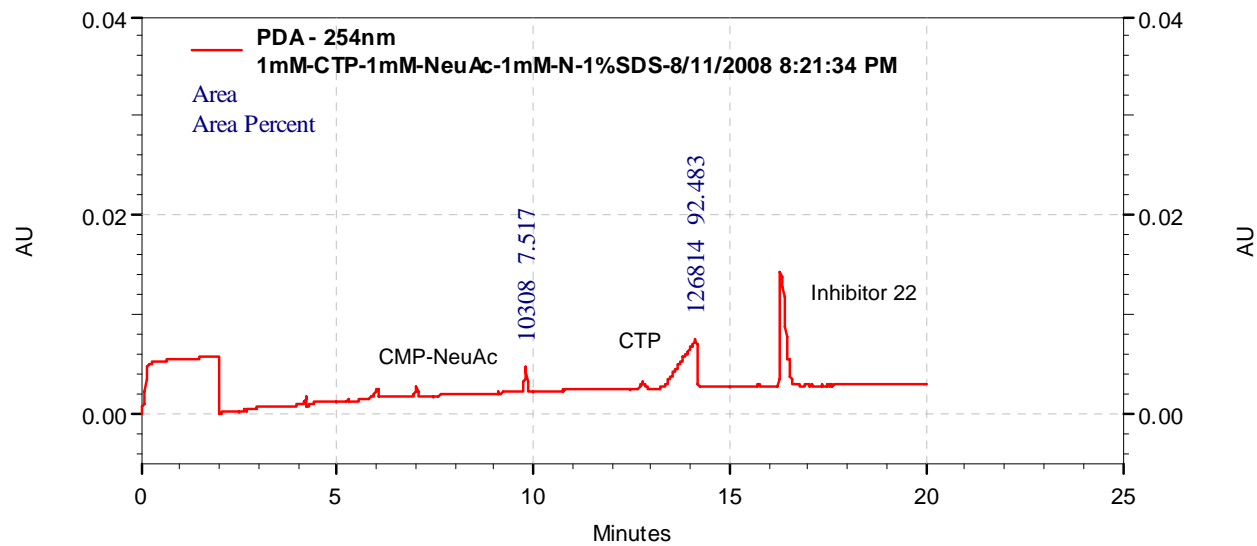

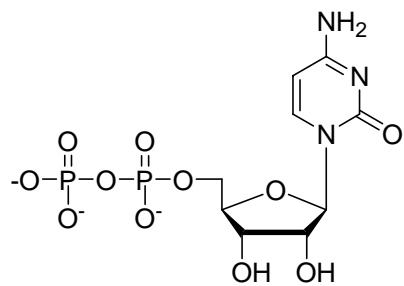

CDP

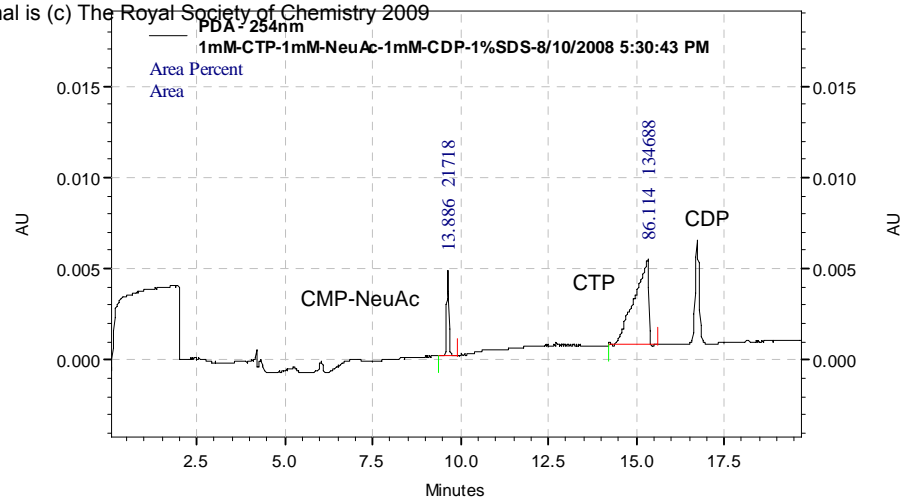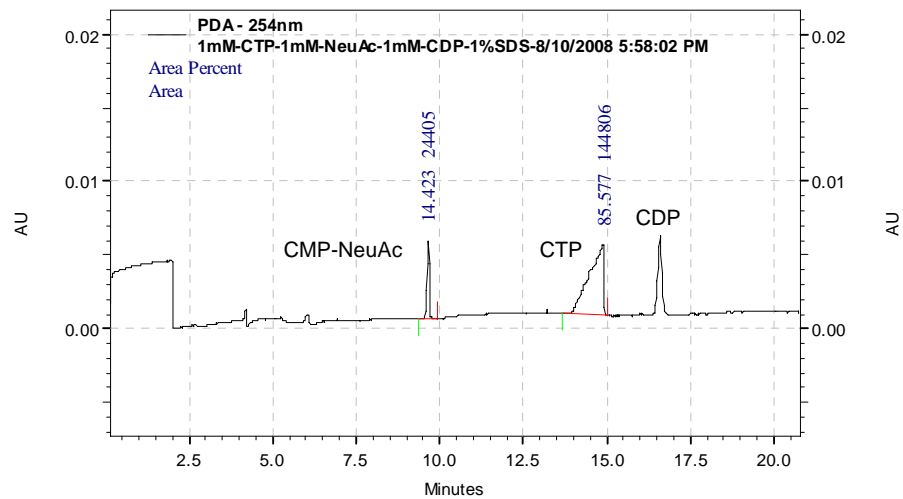

**Reference:**

1. M. J. Hadd, M. A. Smith, M. D. Carducci, J. Gervay-Hague *Tetrahedron Lett.* 2001, **42**, 5137.
2. X. Chen, A. J. Wiemer, R. J. Hohl, D. F. Wiemer *J. Org. Chem.* 2002, **67**, 9331.
3. J. H. Wong, M. M. Olmstead, J. C. Fettinger, J. Gervay-Hague *Acta Cryst. Sec. E.* 2007, **63**, 3046.
4. S. J. Danishefsky, S. L. DeNinno, S. H. Chen, L. Boisvert, M. Barbachyn *J. Am. Chem. Soc.* 1989, **111**, 5810.
5. H. Yu, H. Yu, R. Karpel, X. Chen *Bioorg. Med. Chem.* 2004, **12**, 6427.
